# Supplementary material for: Quantitative Proteomic Analyses of a Pathogenic Strain and Its Highly Passaged Attenuated Strain of Mycoplasma hyopneumoniae
Source: Biomed Res Int. 2019 Jul 1;2019:4165735. doi: 10.1155/2019/4165735 (PMC6634062; doi:10.1155/2019/4165735)
Supplement: Supplementary 1 — Table S1: information of all proteins identified in this study. [file 4165735.f1.xlsx]

## Sheet: Protein information
Supplementary Table 1: Information of all proteins identified in this study
Identified Proteins	Accession Number	Molecular Weight	Total Spectrum	Unique Spectrum	Unique Peptide	Percentage Coverage	Mann-Whitney Test (p-value) Benjamini-Hochberg (p<0.02238)	Log2 Fold Change by Category (168 / 168L)	Fold change (168/168L)	Log2 Intensity (116)	Std Dev(116)	CV (116)	Log2 Intensity (117)	Std Dev(117)	CV (117)	Log2 Intensity (119)	Std Dev(119)	CV (119)	Log2 Intensity (113)	Std Dev(113)	CV (113)	Log2 Intensity (114)	Std Dev(114)	CV (114)	Log2 Intensity (115)	Std Dev(115)	CV (115)
pep:novel chromosome:ASM18318v1:Chromosome:286553:287359:1 gene:MHP168_246 transcript:ADQ90457 description: Myo-inositol catabolism protein	ADQ90457	32 kDa	35	12	10	0.45	0.00016	-3.04	-8.22491	10.61	0.816989	0.106	10.79	0.706885	0.106	10.92	0.802876	0.106	7.56	1.01016	0.235	7.55	1.21187	0.235	8.13	0.902988	0.235
pep:novel chromosome:ASM18318v1:Chromosome:287349:288368:1 gene:MHP168_247 transcript:ADQ90458 description: Myo-inositol 2-dehydrogenase	ADQ90458	39 kDa	79	24	16	0.43	0.0001	-2.89	-7.4127	10.43	0.92809	0.0624	10.57	0.889647	0.0624	10.6	0.987975	0.0624	7.5	1.14816	0.102	7.56	1.1115	0.102	7.78	0.953838	0.102
pep:novel chromosome:ASM18318v1:Chromosome:294631:295836:1 gene:MHP168_252 transcript:ADQ90463 description: Periplasmic sugar-binding protein	ADQ90463	44 kDa	82	34	21	0.61	0.0001	-2.76	-6.77396	10.85	0.734334	0.115	10.99	0.722585	0.115	11.18	0.780356	0.115	8.22	0.710679	0.174	8.05	0.870396	0.174	8.54	0.833937	0.174
pep:novel chromosome:ASM18318v1:Chromosome:284084:285553:1 gene:MHP168_244 transcript:ADQ90455 description: Methylmalonate-semialdehyde dehydrogenase	ADQ90455	54 kDa	86	36	21	0.48	0.0001	-2.53	-5.77572	10.25	0.941181	0.0468	10.34	0.927804	0.0468	10.39	0.950833	0.0468	7.76	1.15288	0.0566	7.68	1.04199	0.0566	7.85	0.841627	0.0566
pep:novel chromosome:ASM18318v1:Chromosome:282417:283688:-1 gene:MHP168_243 transcript:ADQ90454 description: Serine hydroxymethyltransferase	ADQ90454	47 kDa	73	25	14	0.36	0.0001	-2.4	-5.27803	10.44	0.65038	0.0614	10.5	0.63674	0.0614	10.61	0.690829	0.0614	7.93	0.781692	0.109	8.1	0.729304	0.109	8.24	0.686897	0.109
pep:novel chromosome:ASM40085v1:Chromosome:133261:136170:-1 gene:MHP168L_748 transcript:AGM21887 description: Protein P102	AGM21887	110 kDa	357	104	56	0.54	0.0001	-2.37	-5.16941	10.77	0.718853	0.0621	10.95	0.677478	0.0621	10.89	0.799348	0.0621	8.55	0.831571	0.0907	8.35	0.7842	0.0907	8.59	0.768006	0.0907
pep:novel chromosome:ASM18318v1:Chromosome:285541:286569:1 gene:MHP168_245 transcript:ADQ90456 description: 5-dehydro-2-deoxygluconokinase	ADQ90456	39 kDa	32	16	11	0.3	0.0001	-2.25	-4.75683	10.16	0.668772	0.0991	10.19	0.727622	0.0991	10.42	0.615461	0.0991	7.92	0.734539	0.145	7.81	0.789609	0.145	8.21	0.825121	0.145
pep:novel chromosome:ASM40085v1:Chromosome:369039:370187:1 gene:MHP168L_312 transcript:AGM22092 description: hypothetical protein	AGM22092	46 kDa	73	20	13	0.42	0.0001	-2.22	-4.65893	10.68	0.691435	0.07	10.85	0.775638	0.07	10.86	0.719029	0.07	8.48	0.898128	0.0726	8.54	0.746231	0.0726	8.69	0.848784	0.0726
pep:novel chromosome:ASM18318v1:Chromosome:295859:296902:1 gene:MHP168_253 transcript:ADQ90464 description: Myo-inositol 2-dehydrogenase	ADQ90464	40 kDa	22	16	11	0.39	0.0001	-2.07	-4.19887	9.8	0.521591	0.0858	9.9	0.574908	0.0858	10.04	0.588914	0.0858	7.78	0.670044	0.0741	7.77	0.85301	0.0741	7.96	0.571504	0.0741
pep:novel chromosome:ASM18318v1:Chromosome:288368:290338:1 gene:MHP168_248 transcript:ADQ90459 description: Myo-inositol catabolism	ADQ90459	73 kDa	52	25	17	0.27	0.0001	-2.04	-4.11246	10.33	0.669067	0.0486	10.42	0.669611	0.0486	10.47	0.770178	0.0486	8.38	0.804287	0.0652	8.27	0.897705	0.0652	8.46	0.66541	0.0652
pep:novel chromosome:ASM18318v1:Chromosome:290338:291240:1 gene:MHP168_249 transcript:ADQ90460 description: myo-inositol catabolism protein	ADQ90460	35 kDa	7	6	5	0.2	0.009	-2.04	-4.11246	10.84	0.626364	0.0475	10.78	0.729177	0.0475	10.91	0.631226	0.0475	8.73	0.764307	0.0487	8.85	0.724026	0.0487	8.85	0.694582	0.0487
pep:novel chromosome:ASM18318v1:Chromosome:377080:378183:-1 gene:MHP168_318 transcript:ADQ90525 description: Site-specific DNA-methyltransferase	ADQ90525	43 kDa	17	7	7	0.27	0.0017	-1.65	-3.13834	9.33	0.696828	0.0414	9.23	0.649162	0.0414	9.35	0.755345	0.0414	7.23	1.16106	0.217	7.53	0.658877	0.217	7.85	0.611044	0.217
pep:novel chromosome:ASM18318v1:Chromosome:76043:78808:1 gene:MHP168_066 transcript:ADQ90289 description: hypothetical protein	ADQ90289	106 kDa	8	5	5	0.058	0.009	-1.54	-2.90795	9.77	0.603997	0.0521	9.78	0.571465	0.0521	9.9	0.807206	0.0521	8.32	0.590032	0.11	8.14	0.710312	0.11	8.46	0.881267	0.11
pep:novel chromosome:ASM18318v1:Chromosome:291252:292781:1 gene:MHP168_250 transcript:ADQ90461 description: Ribose ABC transport ATP-binding protein	ADQ90461	57 kDa	24	15	14	0.35	0.0001	-1.39	-2.62079	10.12	0.600538	0.0503	10.26	0.618023	0.0503	10.16	0.594099	0.0503	8.84	0.676095	0.0247	8.77	0.678046	0.0247	8.81	0.632244	0.0247
pep:novel chromosome:ASM18318v1:Chromosome:474452:476578:1 gene:MHP168_392 transcript:ADQ90594 description: lipoprotein	ADQ90594	80 kDa	103	52	36	0.54	0.0001	-1.21	-2.31338	10.09	0.50737	0.073	10.12	0.550793	0.073	10.28	0.545764	0.073	8.95	0.563173	0.0284	8.89	0.543176	0.0284	8.97	0.564809	0.0284
pep:novel chromosome:ASM18318v1:Chromosome:686626:692550:1 gene:MHP168_531 transcript:ADQ90727 description: Putative uncharacterized protein	ADQ90727	230 kDa	164	81	63	0.33	0.0001	-1.21	-2.31338	10.16	0.525036	0.029	10.23	0.535694	0.029	10.24	0.542913	0.029	9.03	0.580397	0.0317	8.95	0.573445	0.0317	9.01	0.532746	0.0317
pep:novel chromosome:ASM18318v1:Chromosome:214570:217758:1 gene:MHP168_195 transcript:ADQ90409 description: Protein P97-copy 2	ADQ90409	120 kDa	120	45	34	0.38	0.0001	-1.12	-2.17347	10.53	0.502889	0.0197	10.59	0.504515	0.0197	10.56	0.547519	0.0197	9.44	0.536838	0.00371	9.44	0.535626	0.00371	9.43	0.533824	0.00371
pep:novel chromosome:ASM18318v1:Chromosome:535602:537287:-1 gene:MHP168_435 transcript:ADQ90637 description: Putative type III restriction-modification system: methylase	ADQ90637	66 kDa	25	6	5	0.14	0.021	-1.07	-2.09943	9.3	0.450813	0.0575	9.46	0.724518	0.0575	9.38	0.456595	0.0575	8.24	0.477302	0.112	8.15	0.557195	0.112	8.46	0.429572	0.112
pep:novel chromosome:ASM18318v1:Chromosome:679983:680876:1 gene:MHP168_526 transcript:ADQ90722 description: Glucose kinase	ADQ90722	33 kDa	15	9	7	0.25	0.0027	-1.04	-2.05623	10.6	0.662762	0.0542	10.75	0.52931	0.0542	10.64	0.611354	0.0542	9.75	0.614595	0.0867	9.5	0.617259	0.0867	9.66	0.644885	0.0867
pep:novel chromosome:ASM18318v1:Chromosome:136237:139485:-1 gene:MHP168_110 transcript:ADQ90328 description: Protein p97, cilium adhesin	ADQ90328	122 kDa	1055	169	70	0.64	0.0001	-1.03	-2.04202	10.35	0.538099	0.0292	10.37	0.570556	0.0292	10.43	0.554573	0.0292	9.36	0.644545	0.052	9.42	0.56594	0.052	9.27	0.609155	0.052
pep:novel chromosome:ASM18318v1:Chromosome:2777:4636:1 gene:MHP168_003 transcript:ADQ90231 description: tRNA uridine 5-carboxymethylaminomethyl modification enzyme mnmG	ADQ90231	69 kDa	17	13	12	0.2	0.0001	-1.01	-2.01391	10	0.548154	0.0298	10.01	0.458996	0.0298	10.08	0.547274	0.0298	8.89	0.514416	0.116	8.96	0.617292	0.116	9.21	0.524857	0.116
pep:novel chromosome:ASM18318v1:Chromosome:597634:598071:1 gene:MHP168_736 transcript:ADQ90913 description: neutrophil activating factor	ADQ90913	17 kDa	91	11	6	0.41	0.0039	-0.98	-1.97247	9.71	0.55369	0.094	9.57	0.568875	0.094	9.84	0.636123	0.094	8.82	0.638424	0.08	8.68	0.694015	0.08	8.59	0.588052	0.08
pep:novel chromosome:ASM18318v1:Chromosome:676640:678178:1 gene:MHP168_523 transcript:ADQ90719 description: Xylose ABC transporter ATP-binding protein	ADQ90719	57 kDa	46	23	15	0.35	0.0001	-0.93	-1.90528	9.91	0.499152	0.0309	9.88	0.529349	0.0309	9.97	0.5182	0.0309	9.04	0.589154	0.0513	8.9	0.549181	0.0513	9.02	0.48823	0.0513
pep:novel chromosome:ASM18318v1:Chromosome:678178:679428:1 gene:MHP168_524 transcript:ADQ90720 description: Xylose ABC transporter permease protein	ADQ90720	45 kDa	21	7	4	0.082	0.021	-0.93	-1.90528	10.57	0.452448	0.0262	10.57	0.451765	0.0262	10.64	0.524256	0.0262	9.66	0.565139	0.00615	9.66	0.560165	0.00615	9.67	0.468736	0.00615
pep:novel chromosome:ASM18318v1:Chromosome:20130:22421:-1 gene:MHP168_019 transcript:ADQ90246 description: ABC transporter ATP-binding protein	ADQ90246	88 kDa	8	7	6	0.085	0.0039	-0.91	-1.87905	8.55	0.490882	0.0668	8.57	0.472611	0.0668	8.4	0.544236	0.0668	7.77	0.528155	0.124	7.42	0.647044	0.124	7.59	0.592936	0.124
pep:novel chromosome:ASM18318v1:Chromosome:476605:477537:1 gene:MHP168_393 transcript:ADQ90595 description: Lipoprotein	ADQ90595	36 kDa	22	10	9	0.28	0.00035	-0.88	-1.84038	8.35	0.443939	0.064	8.32	0.433705	0.064	8.49	0.619874	0.064	7.48	0.543677	0.0305	7.47	0.486777	0.0305	7.55	0.616132	0.0305
pep:novel chromosome:ASM18318v1:Chromosome:47662:48765:1 gene:MHP168_042 transcript:ADQ90265 description: GTPase obg	ADQ90265	42 kDa	10	7	6	0.17	0.0039	-0.88	-1.84038	10.07	0.476354	0.0991	10.03	0.491891	0.0991	10.3	0.496003	0.0991	9.25	0.651046	0.0189	9.29	0.61543	0.0189	9.24	0.470778	0.0189
pep:novel chromosome:ASM18318v1:Chromosome:217779:220628:1 gene:MHP168_196 transcript:ADQ90410 description: Protein P102-copy 2	ADQ90410	108 kDa	46	23	21	0.25	0.0001	-0.83	-1.77769	10.03	0.503787	0.0407	10.11	0.527636	0.0407	10.15	0.522913	0.0407	9.25	0.548964	0.0363	9.22	0.546626	0.0363	9.32	0.573059	0.0363
pep:novel chromosome:ASM18318v1:Chromosome:147053:147376:1 gene:MHP168_121 transcript:ADQ90339 description: 50S ribosomal protein L24	ADQ90339	12 kDa	91	15	6	0.48	0.0039	-0.81	-1.75321	11.89	0.487017	0.0857	11.78	0.451767	0.0857	12.03	0.595957	0.0857	11.04	0.798087	0.135	11.27	0.469966	0.135	10.88	0.64904	0.135
pep:novel chromosome:ASM18318v1:Chromosome:11093:12100:1 gene:MHP168_011 transcript:ADQ90238 description: Heat-inducible transcription repressor hrcA	ADQ90238	38 kDa	44	18	13	0.36	0.0001	-0.78	-1.71713	10.38	0.439162	0.0191	10.38	0.461887	0.0191	10.43	0.474668	0.0191	9.59	0.468214	0.0417	9.57	0.487171	0.0417	9.68	0.46673	0.0417
pep:novel chromosome:ASM18318v1:Chromosome:142558:143061:1 gene:MHP168_113 transcript:ADQ90331 description: 50S ribosomal protein L23	ADQ90331	19 kDa	239	32	11	0.56	0.0001	-0.77	-1.70527	10.73	0.515299	0.109	10.48	0.520874	0.109	10.77	0.600385	0.109	9.72	0.694056	0.155	10.13	0.539737	0.155	9.79	0.599615	0.155
pep:novel chromosome:ASM18318v1:Chromosome:501317:501649:1 gene:MHP168_411 transcript:ADQ90613 description: Thioredoxin	ADQ90613	13 kDa	257	26	11	0.91	0.0001	-0.77	-1.70527	11.03	0.570396	0.0692	11.17	0.531679	0.0692	11.22	0.499699	0.0692	10.25	0.643773	0.0766	10.46	0.538314	0.0766	10.39	0.566548	0.0766
pep:novel chromosome:ASM18318v1:Chromosome:374664:377075:-1 gene:MHP168_317 transcript:ADQ90524 description: Putative uncharacterized protein	ADQ90524	94 kDa	21	14	13	0.16	0.0001	-0.76	-1.69349	10.55	0.461387	0.0218	10.53	0.436714	0.0218	10.59	0.478679	0.0218	9.79	0.449081	0.031	9.75	0.484188	0.031	9.84	0.439602	0.031
pep:novel chromosome:ASM18318v1:Chromosome:357800:359710:-1 gene:MHP168_305 transcript:ADQ90512 description: DNA topoisomerase I	ADQ90512	73 kDa	27	19	16	0.28	0.0001	-0.71	-1.6358	9.97	0.476585	0.0556	9.89	0.486811	0.0556	10.05	0.495182	0.0556	9.2	0.508551	0.0362	9.29	0.604292	0.0362	9.29	0.4892	0.0362
pep:novel chromosome:ASM18318v1:Chromosome:146680:147048:1 gene:MHP168_120 transcript:ADQ90338 description: 50S ribosomal protein L14	ADQ90338	13 kDa	80	18	10	0.64	0.00021	-0.71	-1.6358	11.39	0.457547	0.0244	11.34	0.461404	0.0244	11.41	0.506547	0.0244	10.59	0.574685	0.0547	10.73	0.503015	0.0547	10.71	0.511336	0.0547
pep:novel chromosome:ASM18318v1:Chromosome:529822:530487:1 gene:MHP168_430 transcript:ADQ90632 description: Holliday junction ATP-dependent DNA helicase ruvA	ADQ90632	26 kDa	14	10	8	0.36	0.0011	-0.67	-1.59107	10.45	0.46815	0.057	10.51	0.492951	0.057	10.61	0.487067	0.057	9.8	0.503994	0.0663	9.97	0.462637	0.0663	9.8	0.503642	0.0663
pep:novel chromosome:ASM18318v1:Chromosome:763387:765231:-1 gene:MHP168_593 transcript:ADQ90786 description: Transcription termination-antitermination factor nusA	ADQ90786	70 kDa	91	30	21	0.34	0.0001	-0.65	-1.56917	9.67	0.470604	0.0464	9.75	0.51454	0.0464	9.8	0.528478	0.0464	9.1	0.582834	0.043	9.02	0.509436	0.043	9.15	0.534698	0.043
pep:novel chromosome:ASM18318v1:Chromosome:141225:141917:1 gene:MHP168_111 transcript:ADQ90329 description: 50S ribosomal protein L3	ADQ90329	25 kDa	90	28	14	0.58	0.0001	-0.6	-1.51572	11.09	0.480803	0.0762	11.09	0.506993	0.0762	11.28	0.540766	0.0762	10.5	0.608735	0.0338	10.6	0.520778	0.0338	10.57	0.502919	0.0338
pep:novel chromosome:ASM18318v1:Chromosome:765224:765451:-1 gene:MHP168_594 transcript:ADQ90787 description: Putative uncharacterized protein	ADQ90787	9 kDa	16	5	4	0.36	0.021	-0.58	-1.49485	8.23	0.497868	0.0508	8.09	0.4887	0.0508	8.12	0.450261	0.0508	7.67	0.461891	0.0871	7.43	0.531144	0.0871	7.58	0.453157	0.0871
pep:novel chromosome:ASM18318v1:Chromosome:412769:413329:1 gene:MHP168_342 transcript:ADQ90548 description: Single-stranded DNA-binding protein	ADQ90548	21 kDa	19	6	6	0.37	0.0039	-0.55	-1.46409	9.67	0.427284	0.0757	9.87	0.431032	0.0757	9.7	0.509282	0.0757	8.9	0.563895	0.18	9.27	0.4217	0.18	9.39	0.532367	0.18
pep:novel chromosome:ASM18318v1:Chromosome:495042:496421:1 gene:MHP168_408 transcript:ADQ90610 description: Putative uncharacterized protein	ADQ90610	55 kDa	25	11	9	0.24	0.012	-0.53	-1.44393	9.43	0.501927	0.0893	9.41	0.554244	0.0893	9.64	0.530035	0.0893	8.84	0.679542	0.0836	9.08	0.489673	0.0836	8.95	0.497893	0.0836
pep:novel chromosome:ASM18318v1:Chromosome:12103:12849:1 gene:MHP168_012 transcript:ADQ90239 description: Heat shock protein	ADQ90239	29 kDa	96	30	15	0.67	0.0001	-0.51	-1.42405	10.56	0.464934	0.022	10.63	0.57476	0.022	10.59	0.503445	0.022	10.2	0.479125	0.0715	10.03	0.539404	0.0715	10.02	0.473999	0.0715
pep:novel chromosome:ASM18318v1:Chromosome:152775:153527:1 gene:MHP168_130 transcript:ADQ90347 description: Methionine aminopeptidase	ADQ90347	28 kDa	20	10	7	0.3	0.0017	-0.51	-1.42405	9.42	0.471995	0.0569	9.58	0.473666	0.0569	9.5	0.455538	0.0569	8.97	0.490114	0.0554	8.92	0.497952	0.0554	9.07	0.549651	0.0554
pep:novel chromosome:ASM18318v1:Chromosome:775868:776614:1 gene:MHP168_601 transcript:ADQ90794 description: ribonuclease HII	ADQ90794	29 kDa	7	6	4	0.17	0.021	-0.5	-1.41421	9.2	0.494992	0.0586	9.04	0.450452	0.0586	9.1	0.620684	0.0586	8.77	0.506851	0.109	8.6	0.450889	0.109	8.46	0.545018	0.109
pep:novel chromosome:ASM18318v1:Chromosome:129354:131432:-1 gene:MHP168_105 transcript:ADQ90325 description: ATP-dependent protease binding protein	ADQ90325	80 kDa	40	24	21	0.34	0.0001	-0.48	-1.39474	9.91	0.441026	0.0278	9.9	0.44218	0.0278	9.97	0.461011	0.0278	9.44	0.539182	0.0115	9.44	0.470425	0.0115	9.47	0.488618	0.0115
pep:novel chromosome:ASM18318v1:Chromosome:813310:813807:-1 gene:MHP168_627 transcript:ADQ90817 description: 50S ribosomal protein L10	ADQ90817	18 kDa	52	14	7	0.39	0.0017	-0.48	-1.39474	11.1	0.468326	0.0306	11.07	0.471597	0.0306	11.01	0.478689	0.0306	10.67	0.50001	0.0653	10.62	0.451945	0.0653	10.49	0.500077	0.0653
pep:novel chromosome:ASM18318v1:Chromosome:148589:149104:1 gene:MHP168_124 transcript:ADQ90341 description: 50S ribosomal protein L6	ADQ90341	19 kDa	27	12	8	0.52	0.00078	-0.47	-1.38511	11.49	0.473309	0.0078	11.47	0.50485	0.0078	11.48	0.458541	0.0078	11.02	0.46836	0.0978	10.85	0.515005	0.0978	11.13	0.446662	0.0978
pep:novel chromosome:ASM18318v1:Chromosome:196399:197052:1 gene:MHP168_178 transcript:ADQ90393 description: translation initiation factor IF-3	ADQ90393	26 kDa	84	16	9	0.37	0.00049	-0.45	-1.36604	10.64	0.493486	0.0735	10.46	0.445058	0.0735	10.64	0.478739	0.0735	10.14	0.490698	0.0727	10.22	0.496418	0.0727	10.02	0.471868	0.0727
pep:novel chromosome:ASM18318v1:Chromosome:86286:86558:1 gene:MHP168_074 transcript:ADQ90296 description: Bacterial nucleoid DNA-binding protein	ADQ90296	10 kDa	40	9	4	0.54	0.021	-0.44	-1.3566	11.58	0.407088	0.113	11.55	0.421767	0.113	11.85	0.450213	0.113	11.08	0.526889	0.223	11.59	0.507679	0.223	11	0.492195	0.223
pep:novel chromosome:ASM18318v1:Chromosome:911790:912272:1 gene:MHP168_697 transcript:ADQ90879 description: Transcription elongation factor greA	ADQ90879	18 kDa	148	22	11	0.77	0.0014	-0.43	-1.34723	10.53	0.535407	0.0585	10.69	0.514516	0.0585	10.66	0.537759	0.0585	10.13	0.679811	0.0986	10.36	0.57724	0.0986	10.11	0.57858	0.0986
pep:novel chromosome:ASM18318v1:Chromosome:240794:241759:1 gene:MHP168_214 transcript:ADQ90427 description: oligopeptide transport system permease protein	ADQ90427	36 kDa	24	12	7	0.21	0.0017	-0.42	-1.33793	10.48	0.415006	0.042	10.44	0.483172	0.042	10.56	0.482739	0.042	9.88	0.515897	0.111	10.12	0.457621	0.111	10.18	0.505064	0.111
pep:novel chromosome:ASM18318v1:Chromosome:154888:155886:1 gene:MHP168_134 transcript:ADQ90351 description: DNA-directed RNA polymerase subunit alpha	ADQ90351	37 kDa	65	25	14	0.44	0.0001	-0.41	-1.32869	10.9	0.434261	0.0424	10.98	0.44638	0.0424	11.02	0.497686	0.0424	10.57	0.516073	0.0278	10.5	0.469327	0.0278	10.57	0.459278	0.0278
pep:novel chromosome:ASM18318v1:Chromosome:243163:244494:1 gene:MHP168_216 transcript:ADQ90429 description: Oligopeptide ABC transporter ATP-binding protein	ADQ90429	51 kDa	97	42	23	0.57	0.0001	-0.41	-1.32869	10.38	0.453487	0.0301	10.35	0.473347	0.0301	10.43	0.460477	0.0301	10.03	0.477121	0.0434	9.92	0.471881	0.0434	10.03	0.468687	0.0434
pep:novel chromosome:ASM18318v1:Chromosome:666464:667384:1 gene:MHP168_513 transcript:ADQ90709 description: Dihydrolipoamide acetyltransferase	ADQ90709	33 kDa	155	33	14	0.41	0.0001	-0.41	-1.32869	10.3	0.484157	0.0511	10.42	0.503253	0.0511	10.44	0.55152	0.0511	9.94	0.563526	0.0244	9.95	0.48449	0.0244	10	0.538657	0.0244
pep:novel chromosome:ASM18318v1:Chromosome:800464:802551:-1 gene:MHP168_622 transcript:ADQ90812 description: Putative uncharacterized protein	ADQ90812	79 kDa	34	14	9	0.15	0.00035	-0.41	-1.32869	10.83	0.433816	0.053	10.96	0.448327	0.053	10.97	0.451787	0.053	10.58	0.531197	0.128	10.65	0.458356	0.128	10.3	0.491952	0.128
pep:novel chromosome:ASM18318v1:Chromosome:12833:14437:1 gene:MHP168_013 transcript:ADQ90240 description: Arginyl-tRNA synthetase	ADQ90240	62 kDa	44	26	20	0.41	0.0001	-0.39	-1.31039	10.37	0.456411	0.0321	10.35	0.450706	0.0321	10.28	0.48389	0.0321	10	0.480809	0.0574	9.85	0.495433	0.0574	9.98	0.452213	0.0574
pep:novel chromosome:ASM18318v1:Chromosome:66190:68220:1 gene:MHP168_060 transcript:ADQ90283 description: RNA polymerase sigma factor	ADQ90283	79 kDa	25	16	14	0.25	0.0001	-0.38	-1.30134	9.88	0.453284	0.0302	9.97	0.453492	0.0302	9.94	0.502536	0.0302	9.56	0.515473	0.022	9.56	0.506535	0.022	9.51	0.561596	0.022
pep:novel chromosome:ASM18318v1:Chromosome:676152:676514:1 gene:MHP168_522 transcript:ADQ90718 description: 46 kDa surface antigen	ADQ90718	13 kDa	131	19	9	0.64	0.00035	-0.36	-1.28343	10.52	0.419791	0.0822	10.57	0.427355	0.0822	10.74	0.47921	0.0822	10.21	0.503529	0.0179	10.26	0.48273	0.0179	10.25	0.45339	0.0179
pep:novel chromosome:ASM18318v1:Chromosome:228542:228970:1 gene:MHP168_722 transcript:ADQ90903 description: hypothetical protein	ADQ90903	17 kDa	25	11	7	0.6	0.0017	-0.36	-1.28343	10.32	0.430017	0.0368	10.22	0.50762	0.0368	10.27	0.475398	0.0368	9.98	0.475988	0.082	9.97	0.498946	0.082	9.77	0.568837	0.082
pep:novel chromosome:ASM18318v1:Chromosome:156740:158266:1 gene:MHP168_136 transcript:ADQ90353 description: ISMHp1 transposase	ADQ90353	60 kDa	8	5	5	0.094	0.009	-0.35	-1.27456	9.81	0.408281	0.0418	9.69	0.430352	0.0418	9.74	0.441198	0.0418	9.38	0.471127	0.0445	9.33	0.446486	0.0445	9.46	0.413283	0.0445
pep:novel chromosome:ASM18318v1:Chromosome:752003:752767:-1 gene:MHP168_583 transcript:ADQ90776 description: Glucosamine-6-phosphate isomerase	ADQ90776	29 kDa	18	10	8	0.44	0.016	-0.35	-1.27456	10.15	0.429671	0.0492	10.01	0.45962	0.0492	10.09	0.502388	0.0492	9.71	0.563124	0.0733	9.65	0.52463	0.0733	9.85	0.52541	0.0733
pep:novel chromosome:ASM18318v1:Chromosome:14442:15623:1 gene:MHP168_014 transcript:ADQ90241 description: Fructose-bisphosphate aldolase	ADQ90241	44 kDa	142	41	20	0.57	0.0001	-0.34	-1.26576	10.53	0.457014	0.0385	10.46	0.485847	0.0385	10.57	0.48374	0.0385	10.21	0.528341	0.0568	10.24	0.488481	0.0568	10.09	0.501527	0.0568
pep:novel chromosome:ASM18318v1:Chromosome:244481:250624:1 gene:MHP168_217 transcript:ADQ90430 description: hypothetical protein	ADQ90430	236 kDa	651	198	112	0.61	0.0001	-0.34	-1.26576	10.3	0.449698	0.0125	10.27	0.479653	0.0125	10.3	0.479229	0.0125	9.96	0.514187	0.0236	9.94	0.498782	0.0236	10	0.4841	0.0236
pep:novel chromosome:ASM18318v1:Chromosome:144318:144929:1 gene:MHP168_116 transcript:ADQ90334 description: 50S ribosomal protein L22	ADQ90334	22 kDa	103	20	10	0.72	0.00016	-0.34	-1.26576	9.44	0.454433	0.0631	9.51	0.461542	0.0631	9.62	0.522441	0.0631	9.11	0.5236	0.0406	9.18	0.505981	0.0406	9.23	0.459029	0.0406
pep:novel chromosome:ASM18318v1:Chromosome:809064:812726:-1 gene:MHP168_625 transcript:ADQ90815 description: DNA-directed RNA polymerase subunit beta	ADQ90815	138 kDa	136	67	46	0.41	0.0001	-0.33	-1.25701	9.89	0.447095	0.0272	9.89	0.458162	0.0272	9.96	0.504518	0.0272	9.56	0.535681	0.0336	9.52	0.493873	0.0336	9.62	0.52211	0.0336
pep:novel chromosome:ASM18318v1:Chromosome:599024:599719:-1 gene:MHP168_468 transcript:ADQ90666 description: 50S ribosomal protein L1	ADQ90666	26 kDa	82	25	9	0.49	0.00035	-0.33	-1.25701	10.02	0.455489	0.0211	10.01	0.468488	0.0211	10.06	0.503015	0.0211	9.7	0.509158	0.0101	9.69	0.471573	0.0101	9.72	0.435986	0.0101
pep:novel chromosome:ASM18318v1:Chromosome:333684:335762:1 gene:MHP168_287 transcript:ADQ90496 description: DNA ligase	ADQ90496	79 kDa	24	14	13	0.18	0.00065	-0.33	-1.25701	9.76	0.436386	0.0224	9.78	0.486916	0.0224	9.83	0.486643	0.0224	9.46	0.544878	0.0105	9.44	0.453079	0.0105	9.47	0.449301	0.0105
pep:novel chromosome:ASM18318v1:Chromosome:599721:600170:-1 gene:MHP168_469 transcript:ADQ90667 description: 50S ribosomal protein L11	ADQ90667	17 kDa	45	12	6	0.3	0.0039	-0.33	-1.25701	11.58	0.41019	0.144	11.6	0.43192	0.144	11.95	0.529289	0.144	11.17	0.522048	0.13	11.35	0.616252	0.13	11.55	0.430343	0.13
pep:novel chromosome:ASM18318v1:Chromosome:390216:396143:-1 gene:MHP168_326 transcript:ADQ90533 description: hypothetical protein	ADQ90533	228 kDa	68	40	35	0.19	0.0001	-0.32	-1.24833	9.93	0.436052	0.0279	10.01	0.448971	0.0279	9.94	0.448086	0.0279	9.51	0.479472	0.103	9.61	0.478417	0.103	9.8	0.465996	0.103
pep:novel chromosome:ASM18318v1:Chromosome:606592:607197:-1 gene:MHP168_475 transcript:ADQ90671 description: tRNA (guanine-N(7)-)-methyltransferase	ADQ90671	24 kDa	12	8	7	0.32	0.0017	-0.32	-1.24833	9.72	0.418851	0.0391	9.82	0.430291	0.0391	9.81	0.416899	0.0391	9.38	0.42877	0.0698	9.45	0.423414	0.0698	9.58	0.512989	0.0698
pep:novel chromosome:ASM18318v1:Chromosome:667384:669231:1 gene:MHP168_514 transcript:ADQ90710 description: Dihydrolipoamide dehydrogenase	ADQ90710	66 kDa	197	47	26	0.52	0.0001	-0.3	-1.23114	9.99	0.449427	0.0457	9.96	0.478816	0.0457	10.08	0.477615	0.0457	9.72	0.5481	0.0437	9.65	0.469981	0.0437	9.78	0.504438	0.0437
pep:novel chromosome:ASM18318v1:Chromosome:141910:142554:1 gene:MHP168_112 transcript:ADQ90330 description: 50S ribosomal protein L4	ADQ90330	24 kDa	56	21	12	0.52	0.00066	-0.3	-1.23114	10.56	0.4192	0.0384	10.47	0.45111	0.0384	10.57	0.458936	0.0384	10.21	0.528235	0.0306	10.2	0.449692	0.0306	10.28	0.450079	0.0306
pep:novel chromosome:ASM18318v1:Chromosome:146033:146398:1 gene:MHP168_118 transcript:ADQ90336 description: 50S ribosomal protein L29	ADQ90336	14 kDa	66	11	5	0.32	0.009	-0.3	-1.23114	11.32	0.432531	0.0059	11.32	0.479177	0.0059	11.31	0.4621	0.0059	10.95	0.609891	0.0718	11.14	0.605688	0.0718	10.96	0.473708	0.0718
pep:novel chromosome:ASM18318v1:Chromosome:812933:813298:-1 gene:MHP168_626 transcript:ADQ90816 description: 50S ribosomal protein L7/L12	ADQ90816	13 kDa	472	27	10	0.78	0.0019	-0.29	-1.22264	10.2	0.449852	0.046	10.31	0.446253	0.046	10.18	0.496229	0.046	9.96	0.562413	0.0775	10.06	0.553762	0.0775	9.84	0.518312	0.0775
pep:novel chromosome:ASM18318v1:Chromosome:250635:253313:1 gene:MHP168_218 transcript:ADQ90431 description: Lipoprotein	ADQ90431	102 kDa	190	74	44	0.55	0.0001	-0.28	-1.21419	10.16	0.43992	0.0131	10.19	0.468842	0.0131	10.19	0.46525	0.0131	9.89	0.518766	0.00836	9.89	0.479939	0.00836	9.91	0.453456	0.00836
pep:novel chromosome:ASM18318v1:Chromosome:515345:515824:1 gene:MHP168_422 transcript:ADQ90624 description: Pentitol phosphotransferase enzyme II, A component	ADQ90624	18 kDa	91	10	5	0.32	0.009	-0.28	-1.21419	10.37	0.449181	0.0175	10.42	0.43734	0.0175	10.4	0.470665	0.0175	10.14	0.628954	0.115	10.28	0.490259	0.115	9.95	0.495228	0.115
pep:novel chromosome:ASM18318v1:Chromosome:143184:144032:1 gene:MHP168_114 transcript:ADQ90332 description: 50S ribosomal protein L2	ADQ90332	31 kDa	85	19	9	0.32	0.0013	-0.24	-1.18099	10.49	0.504412	0.133	10.87	0.452848	0.133	10.71	0.495511	0.133	10.35	0.522107	0.0896	10.6	0.519941	0.0896	10.41	0.514399	0.0896
pep:novel chromosome:ASM18318v1:Chromosome:235025:236353:-1 gene:MHP168_208 transcript:ADQ90421 description: tRNA modification GTPase mnmE	ADQ90421	49 kDa	20	15	12	0.28	0.0032	-0.22	-1.16473	9.69	0.439651	0.0429	9.75	0.429341	0.0429	9.82	0.45725	0.0429	9.57	0.479768	0.0502	9.45	0.490765	0.0502	9.58	0.513355	0.0502
pep:novel chromosome:ASM18318v1:Chromosome:412026:412751:1 gene:MHP168_341 transcript:ADQ90547 description: 30S ribosomal protein S6	ADQ90547	29 kDa	98	21	9	0.45	0.019	-0.22	-1.16473	9.65	0.475261	0.0386	9.66	0.49885	0.0386	9.75	0.549124	0.0386	9.47	0.615769	0.0278	9.43	0.481448	0.0278	9.51	0.506245	0.0278
pep:novel chromosome:ASM18318v1:Chromosome:1585:2673:1 gene:MHP168_002 transcript:ADQ90230 description: DNA polymerase III beta subunit	ADQ90230	41 kDa	64	30	18	0.56	0.0049	-0.21	-1.15669	10.22	0.441197	0.0315	10.15	0.484329	0.0315	10.23	0.472292	0.0315	10.09	0.514464	0.0586	9.95	0.468458	0.0586	9.94	0.48189	0.0586
pep:novel chromosome:ASM18318v1:Chromosome:560123:571624:-1 gene:MHP168_456 transcript:ADQ90656 description: Putative uncharacterized protein	ADQ90656	433 kDa	28	23	21	0.063	0.00094	-0.2	-1.1487	8.84	0.506183	0.0146	8.84	0.482951	0.0146	8.8	0.489743	0.0146	8.6	0.484448	0.0138	8.63	0.470306	0.0138	8.64	0.534693	0.0138
pep:novel chromosome:ASM18318v1:Chromosome:154477:154881:1 gene:MHP168_133 transcript:ADQ90350 description: 30S ribosomal protein S11	ADQ90350	15 kDa	48	12	5	0.49	0.009	-0.2	-1.1487	9.9	0.435105	0.0824	10.09	0.42992	0.0824	10.11	0.440043	0.0824	9.73	0.456365	0.105	9.77	0.473822	0.105	10.01	0.439305	0.105
pep:novel chromosome:ASM18318v1:Chromosome:241761:243173:1 gene:MHP168_215 transcript:ADQ90428 description: Oligopeptide ABC transporter ATP-binding protein	ADQ90428	54 kDa	86	36	19	0.52	0.0001	-0.18	-1.13288	9.8	0.435869	0.0223	9.8	0.457341	0.0223	9.75	0.459968	0.0223	9.62	0.488562	0.0719	9.48	0.499749	0.0719	9.69	0.462128	0.0719
pep:novel chromosome:ASM18318v1:Chromosome:753135:753752:1 gene:MHP168_585 transcript:ADQ90778 description: 30S ribosomal protein S4	ADQ90778	24 kDa	62	25	17	0.64	0.0021	-0.16	-1.11729	11.01	0.420339	0.0216	11	0.419032	0.0216	11.06	0.453287	0.0216	10.76	0.532688	0.0727	10.87	0.501286	0.0727	10.97	0.455325	0.0727
pep:novel chromosome:ASM18318v1:Chromosome:41609:43693:-1 gene:MHP168_036 transcript:ADQ90260 description: VACB-like ribonuclease II	ADQ90260	81 kDa	47	30	23	0.35	0.0034	-0.16	-1.11729	9.79	0.439063	0.0314	9.82	0.453902	0.0314	9.88	0.478456	0.0314	9.68	0.497091	0.034	9.62	0.499862	0.034	9.71	0.477275	0.034
pep:novel chromosome:ASM18318v1:Chromosome:89926:92010:-1 gene:MHP168_078 transcript:ADQ90300 description: Elongation factor G	ADQ90300	77 kDa	259	77	32	0.55	0.012	-0.16	-1.11729	9.74	0.47225	0.0316	9.69	0.472351	0.0316	9.78	0.516175	0.0316	9.59	0.550503	0.0273	9.53	0.514098	0.0273	9.61	0.528794	0.0273
pep:novel chromosome:ASM18318v1:Chromosome:804769:809007:-1 gene:MHP168_624 transcript:ADQ90814 description: DNA-directed RNA polymerase subunit beta	ADQ90814	159 kDa	142	76	46	0.39	0.00022	-0.14	-1.10191	9.18	0.460124	0.0395	9.17	0.507848	0.0395	9.28	0.476035	0.0395	9.07	0.52593	0.00784	9.05	0.486496	0.00784	9.07	0.490053	0.00784
pep:novel chromosome:ASM18318v1:Chromosome:662618:665434:-1 gene:MHP168_512 transcript:ADQ90708 description: Lipoprotein	ADQ90708	107 kDa	107	52	36	0.41	0.0035	-0.14	-1.10191	9.96	0.432413	0.059	9.88	0.473924	0.059	10.05	0.464825	0.059	9.79	0.497405	0.0228	9.82	0.469948	0.0228	9.85	0.489151	0.0228
pep:novel chromosome:ASM18318v1:Chromosome:515029:515319:1 gene:MHP168_421 transcript:ADQ90623 description: Pentitol phosphotransferase enzyme II, B component	ADQ90623	10 kDa	311	24	7	0.8	0.0088	-0.14	-1.10191	10.35	0.480976	0.0153	10.38	0.5006	0.0153	10.34	0.530939	0.0153	10.19	0.55959	0.0414	10.28	0.512466	0.0414	10.17	0.551926	0.0414
pep:novel chromosome:ASM18318v1:Chromosome:239694:240794:1 gene:MHP168_212 transcript:ADQ90425 description: Oligopeptide transport system permease protein	ADQ90425	42 kDa	21	9	5	0.16	0.016	-0.14	-1.10191	10.32	0.443274	0.0696	10.22	0.460437	0.0696	10.42	0.45631	0.0696	10.24	0.4976	0.0505	10.1	0.487293	0.0505	10.21	0.458786	0.0505
pep:novel chromosome:ASM18318v1:Chromosome:797985:800441:-1 gene:MHP168_621 transcript:ADQ90811 description: hypothetical protein	ADQ90811	95 kDa	163	71	43	0.57	0.0066	-0.11	-1.07923	10.04	0.449382	0.0174	10.02	0.478142	0.0174	10.07	0.497887	0.0174	9.89	0.539771	0.0256	9.95	0.479135	0.0256	9.96	0.52446	0.0256
pep:novel chromosome:ASM18318v1:Chromosome:657052:659376:-1 gene:MHP168_508 transcript:ADQ90704 description: Oligopeptide transport system permease protein	ADQ90704	91 kDa	67	31	26	0.37	0.00036	-0.1	-1.07177	9.53	0.46076	0.0341	9.44	0.496174	0.0341	9.51	0.457417	0.0341	9.4	0.501209	0.0799	9.23	0.552312	0.0799	9.45	0.465859	0.0799
pep:novel chromosome:ASM18318v1:Chromosome:210440:212359:1 gene:MHP168_192 transcript:ADQ90406 description: DNA gyrase subunit B	ADQ90406	72 kDa	75	36	24	0.39	0.0083	0.08	1.05702	9.21	0.481963	0.025	9.2	0.514434	0.025	9.27	0.501372	0.025	9.35	0.556556	0.0324	9.26	0.498922	0.0324	9.31	0.474995	0.0324
pep:novel chromosome:ASM18318v1:Chromosome:111353:114196:-1 gene:MHP168_096 transcript:ADQ90316 description: Excinuclease ABC subunit A	ADQ90316	106 kDa	50	28	26	0.31	0.0054	0.1	1.07177	9.56	0.456061	0.0256	9.58	0.464536	0.0256	9.63	0.453742	0.0256	9.72	0.464638	0.0217	9.66	0.454293	0.0217	9.7	0.475965	0.0217
pep:novel chromosome:ASM18318v1:Chromosome:877867:881742:-1 gene:MHP168_676 transcript:ADQ90862 description: P146 adhesin like-protein, p97 paralog	ADQ90862	146 kDa	817	137	60	0.55	0.0039	0.12	1.08673	10.21	0.478392	0.0377	10.13	0.516115	0.0377	10.23	0.517812	0.0377	10.34	0.569497	0.0125	10.31	0.492926	0.0125	10.31	0.571326	0.0125
pep:novel chromosome:ASM18318v1:Chromosome:181419:182492:-1 gene:MHP168_164 transcript:ADQ90380 description: Peptide chain release factor 1	ADQ90380	40 kDa	73	25	16	0.47	0.0075	0.12	1.08673	9.96	0.419396	0.0202	9.98	0.453931	0.0202	9.93	0.471539	0.0202	10.13	0.501865	0.0578	10.13	0.474719	0.0578	9.98	0.432299	0.0578
pep:novel chromosome:ASM18318v1:Chromosome:499811:501250:1 gene:MHP168_410 transcript:ADQ90612 description: Prolyl-tRNA synthetase	ADQ90612	56 kDa	45	25	20	0.48	0.002	0.13	1.09429	9.41	0.484617	0.0108	9.38	0.474255	0.0108	9.38	0.4954	0.0108	9.56	0.490101	0.0422	9.45	0.467971	0.0422	9.55	0.477263	0.0422
pep:novel chromosome:ASM18318v1:Chromosome:28252:29652:1 gene:MHP168_026 transcript:ADQ90251 description: Glutamyl-tRNA amidotransferase subunit B	ADQ90251	54 kDa	38	20	14	0.35	0.0044	0.13	1.09429	9.33	0.430617	0.0518	9.18	0.46173	0.0518	9.28	0.460235	0.0518	9.43	0.461503	0.0278	9.35	0.451345	0.0278	9.4	0.524585	0.0278
pep:novel chromosome:ASM18318v1:Chromosome:634330:636978:-1 gene:MHP168_499 transcript:ADQ90695 description: hypothetical protein	ADQ90695	102 kDa	126	54	34	0.49	0.00071	0.14	1.10191	10.24	0.466868	0.0421	10.12	0.496738	0.0421	10.18	0.480939	0.0421	10.34	0.516117	0.0207	10.3	0.49225	0.0207	10.35	0.511493	0.0207
pep:novel chromosome:ASM18318v1:Chromosome:511721:512773:1 gene:MHP168_419 transcript:ADQ90621 description: Putative uncharacterized protein	ADQ90621	39 kDa	189	44	19	0.69	0.0058	0.15	1.10957	9.3	0.493549	0.0573	9.15	0.55382	0.0573	9.3	0.510523	0.0573	9.42	0.579636	0.0269	9.37	0.56166	0.0269	9.44	0.49604	0.0269
pep:novel chromosome:ASM18318v1:Chromosome:622811:624349:-1 gene:MHP168_489 transcript:ADQ90685 description: ATP synthase alpha chain	ADQ90685	58 kDa	24	13	11	0.26	0.011	0.16	1.11729	9.72	0.446813	0.0389	9.64	0.446119	0.0389	9.61	0.481443	0.0389	9.81	0.461224	0.0856	9.7	0.506126	0.0856	9.95	0.501411	0.0856
pep:novel chromosome:ASM18318v1:Chromosome:533356:534453:-1 gene:MHP168_433 transcript:ADQ90635 description: Putative uncharacterized protein	ADQ90635	42 kDa	18	11	9	0.28	0.0017	0.17	1.12506	8.67	0.434375	0.05	8.6	0.476045	0.05	8.52	0.456845	0.05	8.72	0.480058	0.0934	8.66	0.452804	0.0934	8.92	0.467784	0.0934
pep:novel chromosome:ASM18318v1:Chromosome:550108:551034:-1 gene:MHP168_447 transcript:ADQ90649 description: hypothetical protein	ADQ90649	36 kDa	64	25	13	0.44	0.0061	0.17	1.12506	10.07	0.422563	0.0147	10.07	0.469329	0.0147	10.03	0.471279	0.0147	10.3	0.492308	0.0417	10.21	0.478373	0.0417	10.18	0.499628	0.0417
pep:novel chromosome:ASM18318v1:Chromosome:194733:196169:1 gene:MHP168_177 transcript:ADQ90392 description: Pyruvate kinase	ADQ90392	53 kDa	109	36	19	0.41	0.0001	0.19	1.14076	9.81	0.44796	0.0383	9.7	0.475126	0.0383	9.74	0.484435	0.0383	9.94	0.499841	0.0318	9.9	0.470062	0.0318	9.99	0.478781	0.0318
pep:novel chromosome:ASM18318v1:Chromosome:596133:596717:1 gene:MHP168_464 transcript:ADQ90662 description: Acyl carrier protein phosphodiesterase	ADQ90662	22 kDa	60	13	8	0.51	0.00078	0.19	1.14076	10.45	0.433452	0.0359	10.35	0.448039	0.0359	10.38	0.427167	0.0359	10.64	0.462668	0.0332	10.55	0.456382	0.0332	10.57	0.435861	0.0332
pep:novel chromosome:ASM18318v1:Chromosome:916817:919285:1 gene:MHP168_702 transcript:ADQ90883 description: Valyl-tRNA synthetase	ADQ90883	97 kDa	22	15	14	0.19	0.0088	0.19	1.14076	9.08	0.499331	0.0408	9.09	0.497834	0.0408	8.98	0.506914	0.0408	9.3	0.485872	0.0515	9.16	0.500531	0.0515	9.27	0.538583	0.0515
pep:novel chromosome:ASM18318v1:Chromosome:174131:175366:-1 gene:MHP168_155 transcript:ADQ90371 description: Putative uncharacterized protein	ADQ90371	47 kDa	13	8	5	0.16	0.009	0.19	1.14076	8.94	0.42652	0.0915	9.18	0.477849	0.0915	8.97	0.467967	0.0915	9.23	0.428939	0.0984	9.05	0.528044	0.0984	9.33	0.471157	0.0984
pep:novel chromosome:ASM18318v1:Chromosome:182549:185446:-1 gene:MHP168_165 transcript:ADQ90381 description: hypothetical protein	ADQ90381	110 kDa	103	50	33	0.38	0.0001	0.2	1.1487	10.08	0.429421	0.045	10	0.447188	0.045	9.95	0.44708	0.045	10.18	0.469763	0.072	10.15	0.456535	0.072	10.34	0.487862	0.072
pep:novel chromosome:ASM18318v1:Chromosome:472458:474446:1 gene:MHP168_391 transcript:ADQ90593 description: lipoprotein	ADQ90593	76 kDa	105	48	31	0.48	0.0001	0.2	1.1487	9.63	0.464039	0.0106	9.63	0.454736	0.0106	9.6	0.487922	0.0106	9.92	0.483751	0.0626	9.79	0.464406	0.0626	9.75	0.485631	0.0626
pep:novel chromosome:ASM18318v1:Chromosome:33740:35989:-1 gene:MHP168_030 transcript:ADQ90254 description: Topoisomerase IV subunit A	ADQ90254	86 kDa	47	27	20	0.29	0.00014	0.2	1.1487	9.11	0.479044	0.0312	9.06	0.489121	0.0312	9.02	0.486834	0.0312	9.3	0.502683	0.0428	9.2	0.464056	0.0428	9.31	0.496656	0.0428
pep:novel chromosome:ASM18318v1:Chromosome:719439:720773:-1 gene:MHP168_554 transcript:ADQ90750 description: Spermidine/putrescine import ATP-binding protein potA	ADQ90750	52 kDa	13	10	9	0.24	0.0071	0.2	1.1487	9.12	0.465755	0.0306	9.05	0.436405	0.0306	9.14	0.536799	0.0306	9.38	0.469906	0.0525	9.29	0.4997	0.0525	9.22	0.447285	0.0525
pep:novel chromosome:ASM18318v1:Chromosome:382968:385286:-1 gene:MHP168_321 transcript:ADQ90528 description: ABC transporter ATP-binding protein	ADQ90528	87 kDa	28	15	13	0.2	0.00012	0.21	1.15669	8.85	0.486984	0.0385	8.75	0.495445	0.0385	8.76	0.497322	0.0385	9	0.48244	0.0474	8.94	0.47645	0.0474	9.07	0.486855	0.0474
pep:novel chromosome:ASM18318v1:Chromosome:45529:46542:-1 gene:MHP168_039 transcript:ADQ90262 description: recombinase A	ADQ90262	37 kDa	15	9	8	0.26	0.012	0.21	1.15669	9.8	0.421272	0.0541	9.65	0.474398	0.0541	9.76	0.442068	0.0541	9.99	0.496354	0.0354	9.98	0.447601	0.0354	9.9	0.431906	0.0354
pep:novel chromosome:ASM18318v1:Chromosome:585756:586892:-1 gene:MHP168_461 transcript:ADQ90659 description: S-adenosylmethionine synthetase	ADQ90659	42 kDa	16	9	7	0.21	0.013	0.21	1.15669	10.21	0.410986	0.0157	10.18	0.499175	0.0157	10.22	0.477936	0.0157	10.38	0.416739	0.0199	10.44	0.476663	0.0199	10.4	0.446498	0.0199
pep:novel chromosome:ASM18318v1:Chromosome:232738:234204:1 gene:MHP168_206 transcript:ADQ90419 description: lysyl-tRNA synthetase	ADQ90419	57 kDa	56	24	15	0.32	0.0001	0.22	1.16473	10.19	0.428237	0.0221	10.21	0.45249	0.0221	10.15	0.479387	0.0221	10.48	0.48225	0.0357	10.38	0.450846	0.0357	10.39	0.464533	0.0357
pep:novel chromosome:ASM18318v1:Chromosome:696105:698717:-1 gene:MHP168_534 transcript:ADQ90730 description: Heat shock ATP-dependent protease	ADQ90730	99 kDa	176	65	36	0.48	0.0001	0.22	1.16473	9.67	0.445448	0.0254	9.64	0.476749	0.0254	9.59	0.477933	0.0254	9.91	0.512739	0.0557	9.75	0.482565	0.0557	9.85	0.482952	0.0557
pep:novel chromosome:ASM18318v1:Chromosome:746620:747984:-1 gene:MHP168_578 transcript:ADQ90771 description: Dihydrolipoyl dehydrogenase	ADQ90771	51 kDa	66	22	14	0.33	0.00011	0.22	1.16473	10.33	0.426036	0.0277	10.33	0.464523	0.0277	10.4	0.46956	0.0277	10.63	0.534736	0.0385	10.52	0.455635	0.0385	10.57	0.452042	0.0385
pep:novel chromosome:ASM18318v1:Chromosome:236397:238013:-1 gene:MHP168_209 transcript:ADQ90422 description: ABC transporter ATP-binding protein	ADQ90422	61 kDa	53	25	15	0.3	0.00015	0.22	1.16473	10.35	0.429534	0.00756	10.33	0.459701	0.00756	10.35	0.445099	0.00756	10.67	0.521987	0.0651	10.53	0.497349	0.0651	10.5	0.476173	0.0651
pep:novel chromosome:ASM18318v1:Chromosome:492932:493822:-1 gene:MHP168_406 transcript:ADQ90608 description: S-adenosyl-L-methionine-dependent methyltransferase mraW	ADQ90608	34 kDa	18	8	8	0.26	0.0033	0.22	1.16473	9.63	0.451169	0.0347	9.53	0.509586	0.0347	9.57	0.546221	0.0347	9.84	0.480129	0.0389	9.74	0.474813	0.0389	9.84	0.462003	0.0389
pep:novel chromosome:ASM18318v1:Chromosome:303579:304865:1 gene:MHP168_260 transcript:ADQ90471 description: Histidyl-tRNA synthetase	ADQ90471	51 kDa	16	11	9	0.21	0.0041	0.22	1.16473	9.39	0.444949	0.0367	9.31	0.485154	0.0367	9.29	0.419833	0.0367	9.69	0.462382	0.129	9.34	0.443024	0.129	9.62	0.424227	0.129
pep:novel chromosome:ASM18318v1:Chromosome:846509:847741:-1 gene:MHP168_652 transcript:ADQ90840 description: Hemolysin C	ADQ90840	48 kDa	7	6	6	0.13	0.016	0.22	1.16473	9.59	0.416894	0.0148	9.55	0.500047	0.0148	9.58	0.436311	0.0148	9.82	0.418389	0.0221	9.76	0.450658	0.0221	9.81	0.425728	0.0221
pep:novel chromosome:ASM18318v1:Chromosome:914893:916806:1 gene:MHP168_700 transcript:ADQ90882 description: Putative uncharacterized protein	ADQ90882	77 kDa	14	12	11	0.16	0.0028	0.23	1.17283	9.83	0.436121	0.00668	9.84	0.458004	0.00668	9.82	0.451146	0.00668	10.05	0.495508	0.0227	10.04	0.433419	0.0227	10.1	0.459306	0.0227
pep:novel chromosome:ASM18318v1:Chromosome:432478:433704:-1 gene:MHP168_361 transcript:ADQ90565 description: hypothetical protein	ADQ90565	48 kDa	9	7	6	0.18	0.0039	0.23	1.17283	9.38	0.53004	0.0579	9.54	0.422951	0.0579	9.44	0.427453	0.0579	9.64	0.433357	0.0458	9.65	0.457293	0.0458	9.76	0.445004	0.0458
pep:novel chromosome:ASM18318v1:Chromosome:332718:333680:1 gene:MHP168_286 transcript:ADQ90495 description: ABC Transporter permease protein	ADQ90495	37 kDa	9	5	4	0.11	0.021	0.23	1.17283	9.47	0.434392	0.145	9.17	0.462924	0.145	9.58	0.448047	0.145	9.75	0.484817	0.0713	9.61	0.427773	0.0713	9.54	0.557791	0.0713
pep:novel chromosome:ASM18318v1:Chromosome:348053:350209:1 gene:MHP168_295 transcript:ADQ90504 description: Phenylalanyl-tRNA synthetase beta chain	ADQ90504	83 kDa	70	34	25	0.36	0.0001	0.24	1.18099	10.52	0.409969	0.0308	10.47	0.441565	0.0308	10.43	0.478195	0.0308	10.8	0.522705	0.0777	10.6	0.439274	0.0777	10.77	0.457241	0.0777
pep:novel chromosome:ASM18318v1:Chromosome:518947:521811:1 gene:MHP168_424 transcript:ADQ90626 description: Lppt protein	ADQ90626	109 kDa	316	80	42	0.53	0.0001	0.24	1.18099	10.04	0.469375	0.0235	9.97	0.506724	0.0235	10	0.488823	0.0235	10.25	0.551573	0.0123	10.22	0.515831	0.0123	10.25	0.485369	0.0123
pep:novel chromosome:ASM18318v1:Chromosome:587986:595941:-1 gene:MHP168_463 transcript:ADQ90661 description: ABC transporter permease protein	ADQ90661	305 kDa	109	67	59	0.24	0.0001	0.24	1.18099	9.62	0.477555	0.0146	9.63	0.479689	0.0146	9.59	0.477563	0.0146	9.9	0.493813	0.0315	9.82	0.46087	0.0315	9.9	0.495363	0.0315
pep:novel chromosome:ASM18318v1:Chromosome:144929:145612:1 gene:MHP168_117 transcript:ADQ90335 description: 30S ribosomal protein S3	ADQ90335	26 kDa	48	20	13	0.5	0.00013	0.24	1.18099	10.01	0.420354	0.0373	9.98	0.459288	0.0373	9.91	0.47142	0.0373	10.37	0.457577	0.116	10.04	0.430188	0.116	10.24	0.517467	0.116
pep:novel chromosome:ASM18318v1:Chromosome:62968:64335:1 gene:MHP168_058 transcript:ADQ90281 description: Glycyl-tRNA synthetase	ADQ90281	53 kDa	26	14	11	0.29	0.00035	0.24	1.18099	9.47	0.454336	0.00865	9.46	0.438717	0.00865	9.45	0.456428	0.00865	9.68	0.478139	0.0757	9.59	0.439824	0.0757	9.81	0.43754	0.0757
pep:novel chromosome:ASM18318v1:Chromosome:119876:120367:1 gene:MHP168_100 transcript:ADQ90320 description: Thiol peroxidase	ADQ90320	18 kDa	176	19	8	0.67	0.0011	0.24	1.18099	9.68	0.485243	0.056	9.68	0.523513	0.056	9.54	0.478537	0.056	9.91	0.593627	0.0433	9.92	0.512959	0.0433	9.81	0.455106	0.0433
pep:novel chromosome:ASM18318v1:Chromosome:543163:544281:1 gene:MHP168_442 transcript:ADQ90644 description: tRNA-specific 2-thiouridylase mnmA	ADQ90644	42 kDa	14	10	8	0.22	0.0063	0.24	1.18099	9.35	0.508777	0.0534	9.21	0.503951	0.0534	9.34	0.483092	0.0534	9.56	0.529255	0.0416	9.48	0.444103	0.0416	9.59	0.459757	0.0416
pep:novel chromosome:ASM18318v1:Chromosome:152146:152784:1 gene:MHP168_129 transcript:ADQ90346 description: Adenylate kinase	ADQ90346	24 kDa	35	13	7	0.34	0.018	0.24	1.18099	9.63	0.493422	0.00588	9.61	0.500209	0.00588	9.62	0.445186	0.00588	9.83	0.520913	0.0406	9.82	0.492529	0.0406	9.93	0.519786	0.0406
pep:novel chromosome:ASM18318v1:Chromosome:221689:224403:1 gene:MHP168_198 transcript:ADQ90412 description: Protein P102	ADQ90412	102 kDa	306	16	9	0.5	0.00078	0.25	1.18921	10.33	0.432644	0.0309	10.25	0.432782	0.0309	10.33	0.471795	0.0309	10.56	0.486171	0.017	10.58	0.462953	0.017	10.53	0.441277	0.017
pep:novel chromosome:ASM18318v1:Chromosome:705036:706325:-1 gene:MHP168_542 transcript:ADQ90738 description: Glucose-6-phosphate isomerase	ADQ90738	49 kDa	27	16	11	0.31	0.0018	0.25	1.18921	9.36	0.50749	0.0524	9.21	0.537008	0.0524	9.28	0.534343	0.0524	9.52	0.52656	0.0812	9.44	0.519707	0.0812	9.67	0.525567	0.0812
pep:novel chromosome:ASM18318v1:Chromosome:753873:754307:1 gene:MHP168_586 transcript:ADQ90779 description: Ribose 5-phosphate isomerase B	ADQ90779	16 kDa	112	23	11	0.64	0.00057	0.26	1.19748	10.87	0.456543	0.0477	11	0.489719	0.0477	10.99	0.447458	0.0477	11.23	0.507868	0.0271	11.25	0.506446	0.0271	11.17	0.46369	0.0271
pep:novel chromosome:ASM18318v1:Chromosome:608152:609093:-1 gene:MHP168_477 transcript:ADQ90673 description: Putative uncharacterized protein	ADQ90673	37 kDa	13	8	8	0.21	0.00078	0.26	1.19748	10.26	0.410619	0.0547	10.11	0.451808	0.0547	10.13	0.423959	0.0547	10.41	0.470808	0.0579	10.52	0.426772	0.0579	10.35	0.4066	0.0579
pep:novel chromosome:ASM18318v1:Chromosome:611161:611877:-1 gene:MHP168_479 transcript:ADQ90675 description: ABC transporter ATP binding protein	ADQ90675	28 kDa	16	10	8	0.31	0.0046	0.26	1.19748	9.34	0.463346	0.0193	9.34	0.442663	0.0193	9.29	0.469819	0.0193	9.58	0.513473	0.0161	9.61	0.442318	0.0161	9.57	0.489786	0.0161
pep:novel chromosome:ASM18318v1:Chromosome:867299:868336:1 gene:MHP168_671 transcript:ADQ90857 description: XAA-PRO aminopeptidase	ADQ90857	39 kDa	73	27	17	0.55	0.00024	0.27	1.20581	10.56	0.449556	0.0345	10.52	0.452525	0.0345	10.46	0.451736	0.0345	10.84	0.491676	0.0376	10.73	0.450981	0.0376	10.81	0.50205	0.0376
pep:novel chromosome:ASM18318v1:Chromosome:162722:163738:-1 gene:MHP168_142 transcript:ADQ90359 description: Phosphopentomutase	ADQ90359	38 kDa	46	17	12	0.4	0.0027	0.28	1.21419	9.76	0.42863	0.039	9.65	0.472871	0.039	9.72	0.451576	0.039	10	0.545225	0.0451	10.03	0.472811	0.0451	9.9	0.468707	0.0451
pep:novel chromosome:ASM18318v1:Chromosome:166862:167257:1 gene:MHP168_146 transcript:ADQ90363 description: Cytidine deaminase	ADQ90363	15 kDa	25	7	5	0.45	0.009	0.28	1.21419	9.93	0.535891	0.00645	9.91	0.527073	0.00645	9.92	0.419178	0.00645	10.26	0.427621	0.0417	10.15	0.461597	0.0417	10.16	0.418102	0.0417
pep:novel chromosome:ASM18318v1:Chromosome:61619:62941:1 gene:MHP168_057 transcript:ADQ90280 description: Signal recognition particle protein	ADQ90280	49 kDa	68	29	18	0.41	0.0001	0.29	1.22264	9.55	0.441495	0.0243	9.53	0.44398	0.0243	9.48	0.45821	0.0243	9.84	0.469618	0.0248	9.81	0.457282	0.0248	9.77	0.489936	0.0248
pep:novel chromosome:ASM18318v1:Chromosome:71156:75856:1 gene:MHP168_064 transcript:ADQ90287 description: hypothetical protein	ADQ90287	184 kDa	34	24	19	0.13	0.0001	0.29	1.22264	8.3	0.480547	0.0555	8.15	0.533894	0.0555	8.18	0.489258	0.0555	8.55	0.546393	0.0321	8.46	0.468444	0.0321	8.5	0.510359	0.0321
pep:novel chromosome:ASM18318v1:Chromosome:515989:518934:1 gene:MHP168_423 transcript:ADQ90625 description: Putative uncharacterized protein	ADQ90625	114 kDa	411	105	51	0.54	0.0001	0.29	1.22264	10.22	0.455861	0.0433	10.11	0.503277	0.0433	10.22	0.50121	0.0433	10.52	0.555326	0.0233	10.48	0.488237	0.0233	10.46	0.520766	0.0233
pep:novel chromosome:ASM18318v1:Chromosome:433952:435130:-1 gene:MHP168_362 transcript:ADQ90566 description: Putative uncharacterized protein	ADQ90566	47 kDa	14	11	11	0.27	0.00057	0.29	1.22264	10.04	0.446475	0.0485	9.97	0.471916	0.0485	10.11	0.448163	0.0485	10.41	0.511359	0.0773	10.38	0.475307	0.0773	10.21	0.42158	0.0773
pep:novel chromosome:ASM18318v1:Chromosome:238183:239235:1 gene:MHP168_210 transcript:ADQ90423 description: Putative uncharacterized protein	ADQ90423	41 kDa	18	11	8	0.24	0.00078	0.29	1.22264	10.1	0.408755	0.0548	10.06	0.452183	0.0548	10.21	0.435247	0.0548	10.47	0.410787	0.0567	10.44	0.433315	0.0567	10.32	0.405721	0.0567
pep:novel chromosome:ASM18318v1:Chromosome:706463:710872:-1 gene:MHP168_543 transcript:ADQ90739 description: DNA polymerase III, alpha chain	ADQ90739	170 kDa	41	26	23	0.15	0.0001	0.3	1.23114	9.41	0.460294	0.00584	9.43	0.459453	0.00584	9.42	0.45393	0.00584	9.81	0.471811	0.0589	9.7	0.467663	0.0589	9.65	0.488261	0.0589
pep:novel chromosome:ASM18318v1:Chromosome:280699:281760:-1 gene:MHP168_242 transcript:ADQ90453 description: Ribonucleoside-diphosphate reductase beta chain	ADQ90453	41 kDa	72	25	13	0.35	0.00011	0.31	1.23971	9.87	0.434036	0.0392	9.76	0.448873	0.0392	9.81	0.469124	0.0392	10.17	0.483561	0.043	10.06	0.460311	0.043	10.17	0.469983	0.043
pep:novel chromosome:ASM18318v1:Chromosome:531437:533329:-1 gene:MHP168_432 transcript:ADQ90634 description: hypothetical protein	ADQ90634	75 kDa	10	9	7	0.11	0.0017	0.31	1.23971	8.19	0.502894	0.0309	8.28	0.515549	0.0309	8.22	0.45366	0.0309	8.5	0.475211	0.0913	8.44	0.47198	0.0913	8.69	0.508663	0.0913
pep:novel chromosome:ASM18318v1:Chromosome:618237:618893:-1 gene:MHP168_485 transcript:ADQ90681 description: 5'-methylthioadenosine nucleosidase / S-adenosylhomocysteine nucleosidase	ADQ90681	25 kDa	21	10	6	0.24	0.0039	0.31	1.23971	9.32	0.47373	0.0442	9.44	0.511174	0.0442	9.42	0.463107	0.0442	9.68	0.484472	0.0514	9.65	0.438058	0.0514	9.79	0.49259	0.0514
pep:novel chromosome:ASM18318v1:Chromosome:340681:343713:-1 gene:MHP168_292 transcript:ADQ90501 description: P102-like protein	ADQ90501	116 kDa	118	57	38	0.46	0.0001	0.32	1.24833	9.79	0.477408	0.0197	9.75	0.509945	0.0197	9.73	0.48975	0.0197	10.11	0.500542	0.0462	9.99	0.501431	0.0462	10.1	0.490963	0.0462
pep:novel chromosome:ASM18318v1:Chromosome:453332:455437:1 gene:MHP168_377 transcript:ADQ90581 description: Putative uncharacterized protein	ADQ90581	81 kDa	162	57	32	0.5	0.0001	0.32	1.24833	9.63	0.455927	0.00182	9.64	0.465153	0.00182	9.64	0.475293	0.00182	9.99	0.508002	0.0242	9.98	0.469391	0.0242	9.92	0.477521	0.0242
pep:novel chromosome:ASM18318v1:Chromosome:761321:763120:-1 gene:MHP168_592 transcript:ADQ90785 description: Translation initiation factor IF-2	ADQ90785	67 kDa	47	21	16	0.33	0.0001	0.32	1.24833	10.32	0.438222	0.0221	10.31	0.437273	0.0221	10.37	0.444967	0.0221	10.73	0.499163	0.103	10.47	0.491261	0.103	10.73	0.494147	0.103
pep:novel chromosome:ASM18318v1:Chromosome:851544:853916:-1 gene:MHP168_657 transcript:ADQ90845 description: Leucyl-tRNA synthetase	ADQ90845	92 kDa	46	29	21	0.31	0.0001	0.32	1.24833	9.97	0.44027	0.037	9.92	0.479751	0.037	9.86	0.476942	0.037	10.36	0.479914	0.0817	10.13	0.4475	0.0817	10.23	0.446596	0.0817
pep:novel chromosome:ASM18318v1:Chromosome:331826:332728:1 gene:MHP168_285 transcript:ADQ90494 description: Cobalt import ATP-binding protein cbiO 2	ADQ90494	34 kDa	17	11	7	0.29	0.0027	0.32	1.24833	9.96	0.434132	0.0272	9.89	0.458594	0.0272	9.9	0.455821	0.0272	10.3	0.455616	0.0586	10.14	0.440982	0.0586	10.26	0.446805	0.0586
pep:novel chromosome:ASM18318v1:Chromosome:351951:352760:1 gene:MHP168_298 transcript:ADQ90506 description: Putative uncharacterized protein	ADQ90506	31 kDa	7	6	5	0.19	0.009	0.32	1.24833	10.03	0.417733	0.0306	9.94	0.427293	0.0306	9.96	0.445586	0.0306	10.29	0.43706	0.037	10.25	0.427318	0.037	10.36	0.423426	0.037
pep:novel chromosome:ASM18318v1:Chromosome:617479:618207:1 gene:MHP168_484 transcript:ADQ90680 description: hypothetical protein	ADQ90680	27 kDa	14	6	4	0.19	0.021	0.32	1.24833	10.93	0.439713	0.0365	10.92	0.426815	0.0365	11.02	0.434699	0.0365	11.29	0.420625	0.0368	11.34	0.438185	0.0368	11.23	0.413879	0.0368
pep:novel chromosome:ASM18318v1:Chromosome:31080:33740:-1 gene:MHP168_029 transcript:ADQ90253 description: Isoleucyl-tRNA synthetase	ADQ90253	104 kDa	144	56	34	0.41	0.0001	0.33	1.25701	9.85	0.433132	0.0497	9.73	0.476537	0.0497	9.73	0.48091	0.0497	10.16	0.466634	0.0571	10.01	0.455394	0.0571	10.14	0.475399	0.0571
pep:novel chromosome:ASM18318v1:Chromosome:60773:61534:1 gene:MHP168_056 transcript:ADQ90279 description: Elongation factor Ts	ADQ90279	28 kDa	102	29	12	0.59	0.0001	0.33	1.25701	9.84	0.436807	0.0201	9.78	0.471609	0.0201	9.81	0.471411	0.0201	10.21	0.486453	0.0402	10.11	0.438562	0.0402	10.1	0.450122	0.0402
pep:novel chromosome:ASM18318v1:Chromosome:833411:835543:-1 gene:MHP168_639 transcript:ADQ90828 description: 5'-nucleotidase precursor	ADQ90828	81 kDa	207	67	34	0.58	0.0001	0.33	1.25701	9.87	0.455218	0.0165	9.83	0.492659	0.0165	9.84	0.471527	0.0165	10.25	0.491287	0.0422	10.15	0.481933	0.0422	10.14	0.459373	0.0422
pep:novel chromosome:ASM18318v1:Chromosome:92023:92493:-1 gene:MHP168_079 transcript:ADQ90301 description: 30S ribosomal protein S7	ADQ90301	18 kDa	51	16	9	0.56	0.0013	0.34	1.26576	10.36	0.413239	0.018	10.31	0.439177	0.018	10.35	0.461843	0.018	10.64	0.463077	0.0644	10.62	0.436405	0.0644	10.79	0.466812	0.0644
pep:novel chromosome:ASM18318v1:Chromosome:701400:703961:1 gene:MHP168_538 transcript:ADQ90734 description: DNA gyrase subunit A	ADQ90734	95 kDa	80	38	25	0.32	0.0001	0.36	1.28343	9.66	0.448947	0.0242	9.63	0.49447	0.0242	9.59	0.481797	0.0242	10.03	0.483231	0.0284	9.95	0.471464	0.0284	9.97	0.480895	0.0284
pep:novel chromosome:ASM18318v1:Chromosome:93095:93475:-1 gene:MHP168_081 transcript:ADQ90303 description: Putative uncharacterized protein	ADQ90303	14 kDa	4	4	4	0.22	0.021	0.36	1.28343	10.45	0.386999	0.0342	10.44	0.396365	0.0342	10.36	0.399549	0.0342	10.79	0.482257	0.0226	10.74	0.453334	0.0226	10.79	0.41913	0.0226
pep:novel chromosome:ASM18318v1:Chromosome:278028:280190:-1 gene:MHP168_240 transcript:ADQ90451 description: ribonucleotide-diphosphate reductase subunit alpha	ADQ90451	82 kDa	175	62	34	0.57	0.0001	0.37	1.29235	9.97	0.470189	0.0498	9.82	0.523339	0.0498	9.91	0.455781	0.0498	10.31	0.491748	0.0396	10.2	0.484296	0.0396	10.29	0.482066	0.0396
pep:novel chromosome:ASM18318v1:Chromosome:300892:303489:1 gene:MHP168_259 transcript:ADQ90470 description: Protein-export membrane protein secD	ADQ90470	98 kDa	36	18	17	0.22	0.0001	0.37	1.29235	9.75	0.424672	0.0443	9.62	0.448139	0.0443	9.67	0.491682	0.0443	10.09	0.441353	0.0603	9.95	0.432318	0.0603	10.11	0.471836	0.0603
pep:novel chromosome:ASM18318v1:Chromosome:797059:797655:1 gene:MHP168_620 transcript:ADQ90810 description: Putative uncharacterized protein	ADQ90810	22 kDa	26	15	8	0.39	0.00078	0.37	1.29235	10.11	0.426587	0.0434	10.06	0.469007	0.0434	9.98	0.469631	0.0434	10.47	0.498411	0.0234	10.43	0.496295	0.0234	10.41	0.418681	0.0234
pep:novel chromosome:ASM18318v1:Chromosome:380926:382878:-1 gene:MHP168_320 transcript:ADQ90527 description: ABC transporter ATP-binding protein	ADQ90527	75 kDa	32	22	19	0.32	0.0001	0.38	1.30134	9.21	0.445454	0.0331	9.25	0.459313	0.0331	9.15	0.464351	0.0331	9.64	0.502389	0.0657	9.48	0.454718	0.0657	9.64	0.513254	0.0657
pep:novel chromosome:ASM18318v1:Chromosome:525984:528293:1 gene:MHP168_428 transcript:ADQ90630 description: ATP-dependent helicase PcrA	ADQ90630	89 kDa	62	32	26	0.35	0.0001	0.38	1.30134	9.94	0.453912	0.0199	9.89	0.489094	0.0199	9.94	0.492304	0.0199	10.4	0.477869	0.0694	10.2	0.472752	0.0694	10.32	0.45828	0.0694
pep:novel chromosome:ASM18318v1:Chromosome:538218:538775:1 gene:MHP168_437 transcript:ADQ90639 description: Elongation factor P	ADQ90639	21 kDa	30	13	7	0.39	0.0027	0.39	1.31039	9.4	0.439915	0.0308	9.35	0.505549	0.0308	9.31	0.500565	0.0308	9.81	0.521159	0.0877	9.6	0.449078	0.0877	9.83	0.518384	0.0877
pep:novel chromosome:ASM18318v1:Chromosome:796572:796841:1 gene:MHP168_619 transcript:ADQ90809 description: Phosphocarrier protein HPr	ADQ90809	10 kDa	279	17	5	0.47	0.009	0.39	1.31039	10.01	0.45057	0.0232	10.04	0.487827	0.0232	9.97	0.491299	0.0232	10.36	0.485743	0.0936	10.53	0.49807	0.0936	10.27	0.487581	0.0936
pep:novel chromosome:ASM18318v1:Chromosome:670671:671624:-1 gene:MHP168_516 transcript:ADQ90712 description: Phosphate acetyltransferase	ADQ90712	35 kDa	149	37	16	0.68	0.00022	0.4	1.31951	9.47	0.537926	0.0383	9.43	0.580938	0.0383	9.36	0.552605	0.0383	9.75	0.703184	0.044	9.79	0.612095	0.044	9.88	0.512713	0.044
pep:novel chromosome:ASM18318v1:Chromosome:596659:597336:1 gene:MHP168_465 transcript:ADQ90663 description: Acyl carrier protein phosphodiesterase	ADQ90663	26 kDa	59	19	10	0.55	0.00067	0.4	1.31951	10.15	0.486845	0.0392	10.04	0.443985	0.0392	10.11	0.521123	0.0392	10.42	0.527374	0.0464	10.56	0.530382	0.0464	10.48	0.471382	0.0464
pep:novel chromosome:ASM18318v1:Chromosome:760980:761309:-1 gene:MHP168_740 transcript:ADQ90917 description: ribosome-binding factor A	ADQ90917	13 kDa	27	7	5	0.44	0.009	0.41	1.32869	10.03	0.419953	0.0994	9.82	0.483211	0.0994	9.76	0.423653	0.0994	10.4	0.440616	0.0837	10.16	0.432773	0.0837	10.29	0.414563	0.0837
pep:novel chromosome:ASM18318v1:Chromosome:406592:407656:-1 gene:MHP168_335 transcript:ADQ90541 description: Putative uncharacterized protein	ADQ90541	42 kDa	115	36	19	0.5	0.0001	0.42	1.33793	9.18	0.474994	0.0437	9.31	0.505688	0.0437	9.23	0.478843	0.0437	9.72	0.502941	0.0369	9.67	0.474671	0.0369	9.62	0.461792	0.0369
pep:novel chromosome:ASM18318v1:Chromosome:322298:322834:1 gene:MHP168_273 transcript:ADQ90482 description: Putative uncharacterized protein	ADQ90482	20 kDa	25	13	7	0.53	0.018	0.42	1.33793	9.13	0.52258	0.0646	9.12	0.500307	0.0646	8.96	0.553755	0.0646	9.57	0.607277	0.143	9.26	0.480031	0.143	9.65	0.556303	0.143
pep:novel chromosome:ASM18318v1:Chromosome:605069:606448:-1 gene:MHP168_474 transcript:ADQ90670 description: Leucyl aminopeptidase	ADQ90670	51 kDa	128	51	25	0.57	0.0001	0.43	1.34723	9.91	0.474722	0.0454	9.8	0.511082	0.0454	9.91	0.500434	0.0454	10.31	0.543402	0.036	10.26	0.504156	0.036	10.36	0.500041	0.036
pep:novel chromosome:ASM18318v1:Chromosome:920349:922958:-1 gene:MHP168_704 transcript:ADQ90885 description: Putative uncharacterized protein	ADQ90885	102 kDa	182	63	36	0.46	0.0001	0.43	1.34723	9.56	0.460681	0.0494	9.49	0.529212	0.0494	9.63	0.479318	0.0494	9.98	0.510175	0.00796	10	0.496972	0.00796	10	0.47446	0.00796
pep:novel chromosome:ASM18318v1:Chromosome:616739:617479:1 gene:MHP168_483 transcript:ADQ90679 description: NH(3)-dependent NAD+ synthetase	ADQ90679	28 kDa	19	10	7	0.35	0.0017	0.44	1.3566	9.42	0.439055	0.0498	9.3	0.467165	0.0498	9.43	0.490522	0.0498	9.88	0.500414	0.0521	9.75	0.421848	0.0521	9.88	0.451749	0.0521
pep:novel chromosome:ASM18318v1:Chromosome:304858:306561:1 gene:MHP168_261 transcript:ADQ90472 description: Aspartyl-tRNA synthetase	ADQ90472	66 kDa	44	21	16	0.29	0.0001	0.45	1.36604	9.67	0.434601	0.0179	9.68	0.486594	0.0179	9.63	0.463818	0.0179	10.11	0.503038	0.0544	10.03	0.470156	0.0544	10.18	0.461811	0.0544
pep:novel chromosome:ASM18318v1:Chromosome:637329:638543:1 gene:MHP168_500 transcript:ADQ90696 description: Phosphoglycerate kinase	ADQ90696	44 kDa	84	26	17	0.42	0.0001	0.45	1.36604	10.24	0.449481	0.0338	10.16	0.476822	0.0338	10.26	0.478105	0.0338	10.7	0.50275	0.0191	10.65	0.47881	0.0191	10.68	0.528718	0.0191
pep:novel chromosome:ASM18318v1:Chromosome:769495:771234:-1 gene:MHP168_597 transcript:ADQ90790 description: Threonyl-tRNA synthetase	ADQ90790	68 kDa	53	19	18	0.3	0.0001	0.45	1.36604	9.73	0.440743	0.025	9.66	0.467787	0.025	9.69	0.429725	0.025	10.18	0.445574	0.0538	10.05	0.45423	0.0538	10.2	0.450889	0.0538
pep:novel chromosome:ASM18318v1:Chromosome:320903:322144:1 gene:MHP168_272 transcript:ADQ90481 description: Seryl-tRNA synthetase	ADQ90481	48 kDa	18	11	9	0.24	0.00035	0.45	1.36604	9.67	0.447379	0.019	9.61	0.461892	0.019	9.63	0.486627	0.019	10.14	0.500097	0.0785	9.97	0.463761	0.0785	10.18	0.439963	0.0785
pep:novel chromosome:ASM18318v1:Chromosome:175382:176194:-1 gene:MHP168_156 transcript:ADQ90372 description: Putative uncharacterized protein	ADQ90372	32 kDa	21	11	10	0.44	0.00051	0.45	1.36604	9.13	0.469372	0.0533	9.04	0.544525	0.0533	8.97	0.518467	0.0533	9.5	0.497476	0.0894	9.36	0.521488	0.0894	9.62	0.495619	0.0894
pep:novel chromosome:ASM18318v1:Chromosome:68994:69824:1 gene:MHP168_062 transcript:ADQ90285 description: Probable endonuclease 4	ADQ90285	32 kDa	16	9	9	0.43	0.00067	0.45	1.36604	9.49	0.444336	0.0498	9.38	0.484377	0.0498	9.36	0.471232	0.0498	9.97	0.485164	0.0673	9.8	0.450545	0.0673	9.81	0.51279	0.0673
pep:novel chromosome:ASM18318v1:Chromosome:919292:920332:-1 gene:MHP168_703 transcript:ADQ90884 description: hypothetical protein	ADQ90884	40 kDa	15	11	8	0.29	0.00078	0.45	1.36604	9.14	0.463159	0.0488	9.26	0.467956	0.0488	9.26	0.444717	0.0488	9.73	0.455545	0.0384	9.64	0.443777	0.0384	9.64	0.461506	0.0384
pep:novel chromosome:ASM18318v1:Chromosome:538814:540661:1 gene:MHP168_438 transcript:ADQ90640 description: Transketolase	ADQ90640	69 kDa	112	40	21	0.47	0.0001	0.46	1.37554	9.76	0.481125	0.0314	9.7	0.514298	0.0314	9.67	0.475613	0.0314	10.22	0.51609	0.0787	10.06	0.488082	0.0787	10.28	0.533298	0.0787
pep:novel chromosome:ASM18318v1:Chromosome:772681:775881:1 gene:MHP168_600 transcript:ADQ90793 description: ABC transporter ATP binding protein	ADQ90793	124 kDa	158	70	38	0.38	0.0001	0.46	1.37554	10.02	0.468709	0.0345	9.94	0.484559	0.0345	9.93	0.504853	0.0345	10.43	0.539799	0.0536	10.34	0.486177	0.0536	10.49	0.511299	0.0536
pep:novel chromosome:ASM18318v1:Chromosome:771238:772221:-1 gene:MHP168_598 transcript:ADQ90791 description: Tryptophanyl-tRNA synthetase	ADQ90791	37 kDa	30	11	6	0.19	0.0039	0.46	1.37554	11.07	0.425232	0.011	11.07	0.441991	0.011	11.04	0.420157	0.011	11.59	0.433022	0.0455	11.46	0.429484	0.0455	11.51	0.415562	0.0455
pep:novel chromosome:ASM18318v1:Chromosome:234206:235036:1 gene:MHP168_207 transcript:ADQ90420 description: Hydrolase of the HAD family	ADQ90420	32 kDa	43	19	11	0.44	0.00012	0.47	1.38511	9.96	0.460419	0.0602	9.91	0.609227	0.0602	9.79	0.517946	0.0602	10.43	0.503067	0.0649	10.25	0.46485	0.0649	10.37	0.561816	0.0649
pep:novel chromosome:ASM18318v1:Chromosome:132463:132729:1 gene:MHP168_107 transcript:ADQ90327 description: 30S ribosomal protein S15	ADQ90327	10 kDa	38	7	4	0.4	0.021	0.47	1.38511	8.7	0.469072	0.0896	8.85	0.439985	0.0896	8.59	0.474327	0.0896	9.29	0.537098	0.0626	9.12	0.573951	0.0626	9.17	0.477743	0.0626
pep:novel chromosome:ASM18318v1:Chromosome:901956:903404:1 gene:MHP168_692 transcript:ADQ90876 description: Putative ABC transporter ATP-binding-Pr2-like protein	ADQ90876	56 kDa	12	7	7	0.14	0.0088	0.48	1.39474	9.32	0.472644	0.0289	9.24	0.499436	0.0289	9.28	0.47461	0.0289	9.73	0.610957	0.0156	9.78	0.469033	0.0156	9.74	0.426422	0.0156
pep:novel chromosome:ASM18318v1:Chromosome:427781:428845:1 gene:MHP168_357 transcript:ADQ90561 description: Putative uncharacterized protein	ADQ90561	41 kDa	15	12	8	0.24	0.0011	0.49	1.40444	9.88	0.429965	0.0342	9.81	0.474629	0.0342	9.79	0.449311	0.0342	10.33	0.476724	0.00992	10.34	0.452377	0.00992	10.31	0.485237	0.00992
pep:novel chromosome:ASM18318v1:Chromosome:169874:170467:1 gene:MHP168_150 transcript:ADQ90367 description: Guanylate kinase	ADQ90367	23 kDa	13	8	7	0.34	0.0017	0.49	1.40444	8.62	0.488905	0.0365	8.52	0.499138	0.0365	8.59	0.483796	0.0365	9.06	0.53352	0.0164	9.05	0.494793	0.0164	9.09	0.462275	0.0164
pep:novel chromosome:ASM18318v1:Chromosome:923052:924881:-1 gene:MHP168_705 transcript:ADQ90886 description: Putative uncharacterized protein	ADQ90886	71 kDa	48	27	18	0.28	0.0001	0.5	1.41421	9.41	0.431444	0.0404	9.32	0.503909	0.0404	9.31	0.517012	0.0404	9.83	0.486754	0.0137	9.86	0.460418	0.0137	9.87	0.490577	0.0137
pep:novel chromosome:ASM18318v1:Chromosome:723519:724214:-1 gene:MHP168_557 transcript:ADQ90753 description: Potassium uptake protein	ADQ90753	26 kDa	18	11	8	0.46	0.00078	0.5	1.41421	8.97	0.496276	0.0562	8.9	0.500658	0.0562	8.81	0.519427	0.0562	9.61	0.540249	0.124	9.26	0.467054	0.124	9.38	0.568527	0.124
pep:novel chromosome:ASM18318v1:Chromosome:179252:180655:-1 gene:MHP168_162 transcript:ADQ90378 description: Glutamyl-tRNA synthetase	ADQ90378	55 kDa	49	24	16	0.34	0.0001	0.51	1.42405	9.23	0.477734	0.0237	9.17	0.492144	0.0237	9.17	0.482136	0.0237	9.75	0.474554	0.0327	9.65	0.501538	0.0327	9.71	0.482592	0.0327
pep:novel chromosome:ASM18318v1:Chromosome:776908:778425:1 gene:MHP168_603 transcript:ADQ90796 description: 2,3-bisphosphoglycerate-independent phosphoglycerate mutase	ADQ90796	57 kDa	36	20	13	0.35	0.0014	0.51	1.42405	10.12	0.488687	0.0405	10.11	0.567454	0.0405	10.02	0.481873	0.0405	10.69	0.527745	0.0609	10.51	0.495921	0.0609	10.6	0.53868	0.0609
pep:novel chromosome:ASM18318v1:Chromosome:843906:844607:-1 gene:MHP168_648 transcript:ADQ90837 description: TRNA/rRNA methyltransferase	ADQ90837	26 kDa	4	4	4	0.2	0.021	0.51	1.42405	9.12	0.424186	0.008	9.14	0.439689	0.008	9.13	0.555494	0.008	9.79	0.545593	0.163	9.37	0.51162	0.163	9.76	0.470195	0.163
pep:novel chromosome:ASM18318v1:Chromosome:552565:553233:-1 gene:MHP168_450 transcript:ADQ90652 description: Hexulose 6 phosphate synthase	ADQ90652	25 kDa	74	19	10	0.58	0.00029	0.52	1.43396	9.38	0.478282	0.0581	9.25	0.527964	0.0581	9.22	0.478594	0.0581	9.87	0.535221	0.0373	9.82	0.503273	0.0373	9.76	0.453099	0.0373
pep:novel chromosome:ASM18318v1:Chromosome:117555:118895:1 gene:MHP168_098 transcript:ADQ90318 description: Putative uncharacterized protein	ADQ90318	53 kDa	57	21	17	0.4	0.0001	0.53	1.44393	9.45	0.469656	0.00631	9.45	0.484977	0.00631	9.47	0.567199	0.00631	9.95	0.557691	0.0271	10.03	0.582824	0.0271	10	0.517002	0.0271
pep:novel chromosome:ASM18318v1:Chromosome:402758:403492:-1 gene:MHP168_331 transcript:ADQ90537 description: Glycerophosphoryl diester phosphodiesterase	ADQ90537	29 kDa	8	6	5	0.2	0.009	0.53	1.44393	8.28	0.470825	0.0566	8.38	0.494522	0.0566	8.44	0.508409	0.0566	9.05	0.459168	0.111	8.73	0.498599	0.111	8.91	0.49753	0.111
pep:novel chromosome:ASM18318v1:Chromosome:225478:228129:1 gene:MHP168_200 transcript:ADQ90414 description: alanyl-tRNA synthetase	ADQ90414	102 kDa	104	42	31	0.36	0.0001	0.54	1.45397	9.71	0.454314	0.0182	9.66	0.46817	0.0182	9.68	0.480202	0.0182	10.28	0.516966	0.0594	10.13	0.455183	0.0594	10.27	0.470499	0.0594
pep:novel chromosome:ASM18318v1:Chromosome:154061:154474:1 gene:MHP168_132 transcript:ADQ90349 description: 30S ribosomal protein S13	ADQ90349	16 kDa	27	9	5	0.3	0.009	0.54	1.45397	10.42	0.404204	0.0289	10.45	0.419208	0.0289	10.37	0.442076	0.0289	10.95	0.466994	0.0281	10.99	0.450772	0.0281	10.91	0.432699	0.0281
pep:novel chromosome:ASM18318v1:Chromosome:325109:327274:1 gene:MHP168_277 transcript:ADQ90486 description: DNA polymerase III gamma and tau subunit	ADQ90486	84 kDa	22	15	11	0.17	0.0001	0.56	1.47427	9.39	0.481895	0.0352	9.29	0.511037	0.0352	9.38	0.444732	0.0352	9.88	0.458421	0.0445	9.85	0.462167	0.0445	9.98	0.454382	0.0445
pep:novel chromosome:ASM40085v1:Chromosome:504699:506999:-1 gene:MHP168L_413 transcript:AGM22191 description: ABC transporter ATP-binding protein	AGM22191	86 kDa	32	20	17	0.26	0.0001	0.56	1.47427	9.09	0.471247	0.036	8.99	0.560354	0.036	9.05	0.603568	0.036	9.59	0.498901	0.0143	9.63	0.527313	0.0143	9.61	0.477321	0.0143
pep:novel chromosome:ASM18318v1:Chromosome:551700:552629:-1 gene:MHP168_449 transcript:ADQ90651 description: Hexulose-6-phosphate isomerase	ADQ90651	36 kDa	34	18	10	0.38	0.00021	0.57	1.48452	9.56	0.471909	0.0292	9.5	0.500652	0.0292	9.49	0.455475	0.0292	10.15	0.546834	0.0535	10	0.503768	0.0535	10.12	0.465156	0.0535
pep:novel chromosome:ASM18318v1:Chromosome:230469:232616:1 gene:MHP168_205 transcript:ADQ90418 description: Cell division protein	ADQ90418	79 kDa	94	44	25	0.47	0.0001	0.58	1.49485	9.63	0.465129	0.0368	9.53	0.504227	0.0368	9.54	0.494505	0.0368	10.15	0.513777	0.0213	10.11	0.474715	0.0213	10.17	0.515592	0.0213
pep:novel chromosome:ASM18318v1:Chromosome:322837:323637:-1 gene:MHP168_274 transcript:ADQ90483 description: Triacylglycerol lipase	ADQ90483	31 kDa	29	13	13	0.46	0.0001	0.59	1.50525	9.29	0.473441	0.0764	9.13	0.546976	0.0764	9.08	0.487229	0.0764	9.85	0.526859	0.061	9.67	0.530813	0.061	9.74	0.470326	0.061
pep:novel chromosome:ASM18318v1:Chromosome:630363:631166:1 gene:MHP168_495 transcript:ADQ90691 description: Putative uncharacterized protein	ADQ90691	31 kDa	15	8	8	0.3	0.00078	0.59	1.50525	9.97	0.474813	0.0342	9.93	0.435114	0.0342	9.87	0.532029	0.0342	10.55	0.453253	0.0391	10.46	0.487902	0.0391	10.57	0.485063	0.0391
pep:novel chromosome:ASM18318v1:Chromosome:319749:320894:1 gene:MHP168_271 transcript:ADQ90480 description: Enolase	ADQ90480	42 kDa	90	25	14	0.48	0.0001	0.61	1.52626	9.58	0.467954	0.0428	9.58	0.516136	0.0428	9.47	0.486474	0.0428	10.26	0.552992	0.0771	10.04	0.547848	0.0771	10.15	0.492625	0.0771
pep:novel chromosome:ASM18318v1:Chromosome:694588:695796:-1 gene:MHP168_533 transcript:ADQ90729 description: translation elongation factor Tu	ADQ90729	44 kDa	758	69	23	0.66	0.0001	0.61	1.52626	9.02	0.478148	0.0579	8.86	0.603149	0.0579	8.9	0.53613	0.0579	9.51	0.629776	0.0307	9.58	0.556834	0.0307	9.5	0.493093	0.0307
pep:novel chromosome:ASM18318v1:Chromosome:330475:331011:1 gene:MHP168_283 transcript:ADQ90492 description: Hypoxanthine phosphoribosyltransferase	ADQ90492	20 kDa	57	15	9	0.5	0.00035	0.61	1.52626	10.67	0.435392	0.0563	10.51	0.522093	0.0563	10.54	0.424694	0.0563	11.34	0.4625	0.0871	11.12	0.437695	0.0871	11.13	0.448476	0.0871
pep:novel chromosome:ASM18318v1:Chromosome:512837:514606:1 gene:MHP168_420 transcript:ADQ90622 description: Transport protein sgaT	ADQ90622	63 kDa	37	10	7	0.13	0.004	0.62	1.53688	9.77	0.498368	0.0496	9.63	0.518268	0.0496	9.67	0.539184	0.0496	10.35	0.643734	0.0619	10.23	0.475076	0.0619	10.41	0.594331	0.0619
pep:novel chromosome:ASM18318v1:Chromosome:336782:339397:-1 gene:MHP168_289 transcript:ADQ90498 description: Cation-transporting P-type ATPase	ADQ90498	98 kDa	14	9	8	0.13	0.00078	0.63	1.54756	8.54	0.504661	0.0868	8.52	0.476151	0.0868	8.32	0.51276	0.0868	9.05	0.492089	0.0513	9.17	0.477704	0.0513	9.04	0.469318	0.0513
pep:novel chromosome:ASM18318v1:Chromosome:386834:387697:1 gene:MHP168_323 transcript:ADQ90530 description: hypothetical protein	ADQ90530	34 kDa	6	6	5	0.14	0.009	0.63	1.54756	8.56	0.549446	0.099	8.4	0.522257	0.099	8.68	0.528804	0.099	9.24	0.473872	0.071	9.23	0.492338	0.071	9.06	0.662056	0.071
pep:novel chromosome:ASM18318v1:Chromosome:825511:827868:-1 gene:MHP168_634 transcript:ADQ90824 description: Putative uncharacterized protein	ADQ90824	91 kDa	51	28	22	0.28	0.0001	0.66	1.58008	9.46	0.498806	0.071	9.34	0.544472	0.071	9.25	0.54274	0.071	10.02	0.563651	0.0418	9.96	0.522853	0.0418	10.08	0.519018	0.0418
pep:novel chromosome:ASM18318v1:Chromosome:715203:716039:-1 gene:MHP168_549 transcript:ADQ90745 description: Putative uncharacterized protein	ADQ90745	32 kDa	27	12	11	0.46	0.0001	0.68	1.60214	9.93	0.463931	0.0209	9.87	0.42068	0.0209	9.88	0.460029	0.0209	10.55	0.459426	0.0292	10.55	0.448088	0.0292	10.62	0.446962	0.0292
pep:novel chromosome:ASM18318v1:Chromosome:669463:670671:-1 gene:MHP168_515 transcript:ADQ90711 description: Acetate kinase AckA	ADQ90711	44 kDa	120	33	17	0.54	0.0001	0.69	1.61328	9.48	0.465912	0.0436	9.38	0.498822	0.0436	9.36	0.534503	0.0436	10.16	0.543799	0.0533	10.01	0.47679	0.0533	10.09	0.516233	0.0533
pep:novel chromosome:ASM18318v1:Chromosome:844641:845855:-1 gene:MHP168_650 transcript:ADQ90838 description: Cysteinyl-tRNA synthetase	ADQ90838	48 kDa	14	9	7	0.15	0.0027	0.69	1.61328	10.1	0.440742	0.0443	9.98	0.490569	0.0443	10.06	0.46362	0.0443	10.8	0.531025	0.0723	10.62	0.483473	0.0723	10.79	0.446802	0.0723
pep:novel chromosome:ASM18318v1:Chromosome:870179:871705:1 gene:MHP168_673 transcript:ADQ90859 description: Putative uncharacterized protein	ADQ90859	58 kDa	34	18	11	0.28	0.0001	0.7	1.6245	10.01	0.479871	0.0441	9.89	0.47901	0.0441	9.92	0.504164	0.0441	10.68	0.485154	0.0413	10.69	0.494215	0.0413	10.58	0.483516	0.0413
pep:novel chromosome:ASM18318v1:Chromosome:46695:47504:1 gene:MHP168_041 transcript:ADQ90264 description: Pts system, lichenan-specific IIa component	ADQ90264	32 kDa	28	14	9	0.33	0.00035	0.71	1.6358	8.38	0.472204	0.0457	8.36	0.557646	0.0457	8.26	0.621329	0.0457	9.03	0.517145	0.0145	9.06	0.558924	0.0145	9.07	0.488211	0.0145
pep:novel chromosome:ASM18318v1:Chromosome:840787:841755:-1 gene:MHP168_644 transcript:ADQ90833 description: Probable O-sialoglycoprotein endopeptidase	ADQ90833	36 kDa	30	14	10	0.37	0.00016	0.73	1.65864	8.74	0.448903	0.053	8.65	0.522806	0.053	8.59	0.500919	0.053	9.47	0.520556	0.0459	9.37	0.455737	0.0459	9.35	0.438856	0.0459
pep:novel chromosome:ASM18318v1:Chromosome:354937:356541:1 gene:MHP168_302 transcript:ADQ90509 description: CTP synthase	ADQ90509	60 kDa	42	17	14	0.25	0.0001	0.74	1.67018	9.87	0.464953	0.0766	9.67	0.425961	0.0766	9.69	0.444255	0.0766	10.63	0.479889	0.1	10.34	0.430712	0.1	10.51	0.457126	0.1
pep:novel chromosome:ASM18318v1:Chromosome:387700:388731:1 gene:MHP168_324 transcript:ADQ90531 description: Lipoate-protein ligase A	ADQ90531	40 kDa	33	23	14	0.33	0.0001	0.75	1.68179	9.54	0.481359	0.0886	9.28	0.51796	0.0886	9.4	0.576652	0.0886	10.17	0.533773	0.0104	10.16	0.535254	0.0104	10.19	0.570422	0.0104
pep:novel chromosome:ASM18318v1:Chromosome:900200:901798:1 gene:MHP168_691 transcript:ADQ90875 description: ABC transporter ATP-binding-Pr1	ADQ90875	62 kDa	17	8	7	0.16	0.0017	0.75	1.68179	8.93	0.43385	0.0159	8.93	0.513385	0.0159	8.89	0.449416	0.0159	9.7	0.436403	0.0744	9.55	0.429934	0.0744	9.76	0.476004	0.0744
pep:novel chromosome:ASM18318v1:Chromosome:386521:386853:1 gene:MHP168_731 transcript:ADQ90910 description: hypothetical protein	ADQ90910	13 kDa	20	6	4	0.35	0.021	0.76	1.69349	10.46	0.442624	0.075	10.34	0.495231	0.075	10.25	0.520118	0.075	11.27	0.512538	0.0899	11.1	0.513771	0.0899	11.02	0.46256	0.0899
pep:novel chromosome:ASM18318v1:Chromosome:795781:796335:1 gene:MHP168_618 transcript:ADQ90808 description: Thymidine kinase	ADQ90808	21 kDa	36	13	8	0.4	0.00078	0.78	1.71713	9.45	0.494657	0.0612	9.28	0.518083	0.0612	9.32	0.531593	0.0612	10.13	0.535795	0.051	10.05	0.465901	0.051	10.2	0.523839	0.051
pep:novel chromosome:ASM18318v1:Chromosome:323638:324648:-1 gene:MHP168_275 transcript:ADQ90484 description: lipoate-protein ligase A	ADQ90484	39 kDa	11	5	5	0.16	0.009	0.78	1.71713	10.09	0.466745	0.0743	9.97	0.483015	0.0743	9.88	0.491136	0.0743	10.93	0.493524	0.127	10.57	0.455829	0.127	10.8	0.514554	0.127
pep:novel chromosome:ASM18318v1:Chromosome:99159:99857:-1 gene:MHP168_087 transcript:ADQ90309 description: Purine-nucleoside phosphorylase	ADQ90309	26 kDa	47	12	7	0.29	0.0017	0.8	1.7411	9.23	0.446469	0.0696	9.02	0.531033	0.0696	9.11	0.510202	0.0696	9.97	0.546467	0.0242	9.9	0.467936	0.0242	9.93	0.521054	0.0242
pep:novel chromosome:ASM18318v1:Chromosome:192397:193467:1 gene:MHP168_174 transcript:ADQ90389 description: Endo-1,4-beta-glucanase	ADQ90389	39 kDa	119	41	20	0.64	0.0001	0.84	1.79005	9.5	0.492418	0.0475	9.38	0.519096	0.0475	9.39	0.522618	0.0475	10.24	0.529669	0.0406	10.2	0.532672	0.0406	10.32	0.511953	0.0406
pep:novel chromosome:ASM18318v1:Chromosome:388734:389906:1 gene:MHP168_325 transcript:ADQ90532 description: NADH dependent flavin oxidoreductase	ADQ90532	44 kDa	8	5	4	0.11	0.021	0.85	1.8025	9.18	0.485118	0.0428	9.22	0.464059	0.0428	9.1	0.413909	0.0428	9.95	0.545766	0.0549	9.98	0.435273	0.0549	10.1	0.554695	0.0549
pep:novel chromosome:ASM18318v1:Chromosome:793099:794811:1 gene:MHP168_616 transcript:ADQ90806 description: ABC transporter protein	ADQ90806	66 kDa	23	9	6	0.11	0.0039	0.87	1.82766	8.22	0.50721	0.0678	8.41	0.567516	0.0678	8.27	0.575295	0.0678	9.06	0.545933	0.071	9.18	0.521266	0.071	9.26	0.535827	0.071
pep:novel chromosome:ASM18318v1:Chromosome:791582:793096:1 gene:MHP168_615 transcript:ADQ90805 description: Sugar ABC transporter ATP-binding protein	ADQ90805	57 kDa	25	14	10	0.26	0.00016	0.9	1.86607	7.9	0.505228	0.0249	7.83	0.527706	0.0249	7.89	0.602502	0.0249	8.79	0.510663	0.0835	8.64	0.50765	0.0835	8.88	0.53384	0.0835
pep:novel chromosome:ASM18318v1:Chromosome:632016:633476:-1 gene:MHP168_497 transcript:ADQ90693 description: MG2+ ion transporter	ADQ90693	55 kDa	15	10	9	0.23	0.00035	0.9	1.86607	8.79	0.448766	0.0835	8.55	0.586567	0.0835	8.64	0.466739	0.0835	9.62	0.501921	0.0901	9.67	0.485128	0.0901	9.42	0.46828	0.0901
pep:novel chromosome:ASM18318v1:Chromosome:260038:261063:1 gene:MHP168_225 transcript:ADQ90437 description: hypothetical protein	ADQ90437	41 kDa	6	5	4	0.11	0.021	0.92	1.89212	9.24	0.407093	0.141	9.25	0.464046	0.141	8.9	0.534527	0.141	10.03	0.480344	0.0713	10	0.471312	0.0713	10.19	0.464027	0.0713
pep:novel chromosome:ASM18318v1:Chromosome:486624:487307:1 gene:MHP168_400 transcript:ADQ90602 description: Ribonuclease III	ADQ90602	26 kDa	27	12	9	0.34	0.00035	0.94	1.91853	9.08	0.525785	0.0702	8.88	0.544759	0.0702	9	0.500233	0.0702	9.86	0.540365	0.0441	9.91	0.497202	0.0441	9.99	0.485827	0.0441
pep:novel chromosome:ASM18318v1:Chromosome:860248:861240:1 gene:MHP168_664 transcript:ADQ90852 description: Ribose-phosphate pyrophosphokinase	ADQ90852	36 kDa	52	18	12	0.39	0.0001	0.98	1.97247	9.76	0.466058	0.0256	9.74	0.482862	0.0256	9.69	0.484295	0.0256	10.82	0.524938	0.0886	10.58	0.471125	0.0886	10.76	0.516784	0.0886
pep:novel chromosome:ASM18318v1:Chromosome:602478:604862:1 gene:MHP168_473 transcript:ADQ90669 description: hypothetical protein	ADQ90669	93 kDa	10	8	6	0.093	0.0039	0.98	1.97247	7.51	0.549799	0.0281	7.51	0.543262	0.0281	7.44	0.481351	0.0281	8.45	0.548646	0.00701	8.46	0.512537	0.00701	8.45	0.588195	0.00701
pep:novel chromosome:ASM18318v1:Chromosome:497580:499361:-1 gene:MHP168_409 transcript:ADQ90611 description: Putative type III restriction-modification system: methylase	ADQ90611	70 kDa	27	10	9	0.16	0.0039	1.07	2.09943	8.25	0.513471	0.0836	8.07	0.485774	0.0836	8.03	0.473106	0.0836	9.15	0.493863	0.0901	9.09	0.477114	0.0901	9.34	0.511256	0.0901
pep:novel chromosome:ASM18318v1:Chromosome:508417:509604:-1 gene:MHP168_417 transcript:ADQ90619 description: Glycerol transporter subunit A	ADQ90619	46 kDa	7	6	4	0.11	0.021	1.13	2.18859	7.79	0.563674	0.0853	7.76	0.566239	0.0853	7.56	0.605186	0.0853	8.77	0.46655	0.0613	8.82	0.475385	0.0613	8.94	0.56127	0.0613
pep:novel chromosome:ASM40085v1:Chromosome:205059:207176:-1 gene:MHP168L_187 transcript:AGM21970 description: Adenine phosphoribosyltransferase	AGM21970	79 kDa	116	20	10	0.14	0.00016	1.15	2.21914	9.28	0.538162	0.0775	9.11	0.55389	0.0775	9.07	0.598209	0.0775	10.38	0.635932	0.0416	10.27	0.537638	0.0416	10.28	0.525487	0.0416
pep:novel chromosome:ASM18318v1:Chromosome:831531:833336:-1 gene:MHP168_638 transcript:ADQ90827 description: Putative uncharacterized protein	ADQ90827	69 kDa	4	4	4	0.075	0.021	1.16	2.23457	9.13	0.421741	0.0761	9.3	0.771419	0.0761	9.1	0.474975	0.0761	10.27	0.631824	0.0555	10.27	0.55587	0.0555	10.41	0.462564	0.0555
pep:novel chromosome:ASM18318v1:Chromosome:122976:126410:1 gene:MHP168_103 transcript:ADQ90323 description: Outer membrane protein-P95	ADQ90323	132 kDa	60	36	27	0.27	0.0001	1.34	2.53151	8.65	0.620577	0.0304	8.6	0.740796	0.0304	8.56	0.787278	0.0304	9.99	0.628423	0.0696	10.05	0.616909	0.0696	9.85	0.622317	0.0696
pep:novel chromosome:ASM18318v1:Chromosome:126419:129349:1 gene:MHP168_104 transcript:ADQ90324 description: hypothetical protein	ADQ90324	112 kDa	35	22	19	0.23	0.0001	1.59	3.01049	9.28	0.552001	0.152	9.04	0.828942	0.152	8.84	0.740771	0.152	10.72	0.570033	0.0581	10.73	0.549847	0.0581	10.58	0.624519	0.0581
pep:novel chromosome:ASM18318v1:Chromosome:463598:465130:-1 gene:MHP168_385 transcript:ADQ90587 description: Glycerol kinase	ADQ90587	57 kDa	127	39	22	0.49	0.0001	1.59	3.01049	9.1	0.58947	0.118	8.77	0.663736	0.118	8.87	0.80293	0.118	10.53	0.600131	0.0136	10.49	0.589978	0.0136	10.51	0.617876	0.0136
pep:novel chromosome:ASM18318v1:Chromosome:509721:511535:1 gene:MHP168_418 transcript:ADQ90620 description: Lipoprotein	ADQ90620	68 kDa	186	55	31	0.55	0.0001	1.7	3.24901	9.24	0.529844	0.0986	9.03	0.611823	0.0986	8.97	0.602663	0.0986	10.77	0.60427	0.0148	10.81	0.566293	0.0148	10.77	0.529473	0.0148
pep:novel chromosome:ASM18318v1:Chromosome:736346:736621:-1 gene:MHP168_564 transcript:ADQ90760 description: PTS system galactitol-specific enzyme IIB component	ADQ90760	10 kDa	32	8	4	0.57	0.021	1.78	3.43426	8.08	0.474883	0.18	7.74	0.60436	0.18	7.57	0.651048	0.18	9.61	0.584284	0.127	9.8	0.78006	0.127	9.44	0.487987	0.127
pep:novel chromosome:ASM18318v1:Chromosome:54761:56284:1 gene:MHP168_050 transcript:ADQ90273 description: ATP synthase subunit alpha	ADQ90273	56 kDa	62	28	20	0.46	0.023	0.09		8.96	0.441193	0.0218	8.99	0.438998	0.0218	8.93	0.459463	0.0218	9.06	0.455218	0.0294	9	0.482021	0.0294	9.08	0.532861	0.0294
pep:novel chromosome:ASM18318v1:Chromosome:148163:148558:1 gene:MHP168_123 transcript:ADQ90340 description: 30S ribosomal protein S8	ADQ90340	15 kDa	37	13	9	0.66	0.024	0.18		10.8	0.45809	0.00985	10.79	0.447389	0.00985	10.82	0.471537	0.00985	11.01	0.501814	0.0201	10.96	0.470371	0.0201	11.01	0.486893	0.0201
pep:novel chromosome:ASM18318v1:Chromosome:609098:611161:-1 gene:MHP168_478 transcript:ADQ90674 description: Putative uncharacterized protein	ADQ90674	82 kDa	21	16	12	0.19	0.024	0.11		9.18	0.506943	0.032	9.14	0.498709	0.032	9.23	0.469962	0.032	9.34	0.499989	0.034	9.31	0.522934	0.034	9.24	0.553602	0.034
pep:novel chromosome:ASM18318v1:Chromosome:857176:857574:-1 gene:MHP168_660 transcript:ADQ90848 description: 30S ribosomal protein S9	ADQ90848	15 kDa	32	11	6	0.48	0.025	0.28		9.12	0.49764	0.0435	9.25	0.554163	0.0435	9.19	0.549257	0.0435	9.29	0.514194	0.124	9.47	0.549524	0.124	9.64	0.516193	0.124
pep:novel chromosome:ASM18318v1:Chromosome:208999:209967:1 gene:MHP168_191 transcript:ADQ90405 description: 6-phosphofructokinase	ADQ90405	35 kDa	60	19	10	0.35	0.028	0.08		9.63	0.455246	0.00934	9.61	0.445335	0.00934	9.64	0.461119	0.00934	9.75	0.469279	0.0356	9.7	0.479841	0.0356	9.65	0.46779	0.0356
pep:novel chromosome:ASM18318v1:Chromosome:328216:328851:1 gene:MHP168_280 transcript:ADQ90489 description: Thymidylate kinase	ADQ90489	24 kDa	13	6	5	0.22	0.028	0.1		9.95	0.449671	0.0518	10.08	0.426536	0.0518	9.96	0.420267	0.0518	10.17	0.454574	0.0462	10.04	0.41185	0.0462	10.09	0.42144	0.0462
pep:novel chromosome:ASM18318v1:Chromosome:624349:626583:-1 gene:MHP168_490 transcript:ADQ90686 description: hypothetical protein	ADQ90686	87 kDa	5	5	5	0.071	0.028	0.53		9.45	0.700721	0.0749	9.5	0.45433	0.0749	9.29	0.592369	0.0749	9.89	0.571322	0.0407	9.98	0.493395	0.0407	10.01	0.625382	0.0407
pep:novel chromosome:ASM18318v1:Chromosome:362042:364360:-1 gene:MHP168_308 transcript:ADQ90515 description: putative ABC transporter ATP-binding protein	ADQ90515	89 kDa	14	9	9	0.14	0.031	-0.13		9.12	0.468904	0.0693	9.31	0.476805	0.0693	9.14	0.428784	0.0693	9.07	0.456528	0.0107	9.05	0.452257	0.0107	9.04	0.51206	0.0107
pep:novel chromosome:ASM18318v1:Chromosome:26940:28259:1 gene:MHP168_025 transcript:ADQ90250 description: Glutamyl-tRNA amidotransferase subunit A	ADQ90250	49 kDa	31	15	11	0.26	0.033	0.09		9.6	0.463541	0.0382	9.58	0.462836	0.0382	9.49	0.462666	0.0382	9.68	0.498813	0.0718	9.53	0.494261	0.0718	9.72	0.50977	0.0718
pep:novel chromosome:ASM18318v1:Chromosome:413620:414723:1 gene:MHP168_344 transcript:ADQ90550 description: GTP-binding protein YchF	ADQ90550	42 kDa	18	11	10	0.36	0.034	-0.23		9.9	0.492893	0.0204	9.95	0.472801	0.0204	9.96	0.464313	0.0204	9.83	0.623434	0.0857	9.59	0.49315	0.0857	9.74	0.478141	0.0857
pep:novel chromosome:ASM18318v1:Chromosome:167264:168145:1 gene:MHP168_147 transcript:ADQ90364 description: GTP-binding protein	ADQ90364	34 kDa	19	8	7	0.29	0.035	-0.69		8.66	0.551799	0.0767	8.63	0.490264	0.0767	8.46	0.651212	0.0767	8	0.742208	0.0642	7.82	0.721376	0.0642	7.93	0.793689	0.0642
pep:novel chromosome:ASM18318v1:Chromosome:357122:357769:-1 gene:MHP168_304 transcript:ADQ90511 description: Putative uncharacterized protein	ADQ90511	26 kDa	9	7	7	0.38	0.035	0.13		7.84	0.454033	0.0516	7.85	0.538079	0.0516	7.71	0.513263	0.0516	7.95	0.469509	0.0511	7.84	0.553271	0.0511	7.98	0.463233	0.0511
pep:novel chromosome:ASM18318v1:Chromosome:767859:769022:-1 gene:MHP168_596 transcript:ADQ90789 description: Glycerol-3-phosphate dehydrogenase	ADQ90789	43 kDa	45	22	16	0.4	0.035	-0.14		10.43	0.45853	0.00612	10.42	0.458415	0.00612	10.43	0.508324	0.00612	10.27	0.449229	0.00614	10.28	0.507456	0.00614	10.29	0.49691	0.00614
pep:novel chromosome:ASM18318v1:Chromosome:64328:66169:1 gene:MHP168_059 transcript:ADQ90282 description: DNA primase	ADQ90282	71 kDa	8	6	6	0.11	0.037	-0.39		8.21	0.590194	0.0341	8.28	0.509218	0.0341	8.3	0.492484	0.0341	8	0.656369	0.0722	7.82	0.575073	0.0722	7.82	0.623017	0.0722
pep:novel chromosome:ASM18318v1:Chromosome:203789:204913:-1 gene:MHP168_186 transcript:ADQ90401 description: Pyruvate dehydrogenase E1-alpha subunit	ADQ90401	42 kDa	294	50	17	0.54	0.037	0.12		10.21	0.483011	0.00517	10.22	0.519939	0.00517	10.21	0.511275	0.00517	10.38	0.596495	0.0368	10.33	0.494302	0.0368	10.28	0.491019	0.0368
pep:novel chromosome:ASM18318v1:Chromosome:397513:399795:1 gene:MHP168_328 transcript:ADQ90535 description: ABC transporter ATP binding protein	ADQ90535	87 kDa	20	8	6	0.13	0.037	0.18		9.08	0.512634	0.0601	8.91	0.478355	0.0601	9	0.433251	0.0601	9.24	0.477541	0.0594	9.08	0.558339	0.0594	9.2	0.435088	0.0594
pep:novel chromosome:ASM18318v1:Chromosome:711834:712394:-1 gene:MHP168_545 transcript:ADQ90741 description: Ribosome recycling factor	ADQ90741	22 kDa	121	26	13	0.52	0.038	0.09		11.15	0.421931	0.0795	11.15	0.423448	0.0795	10.96	0.488404	0.0795	11.33	0.557067	0.0875	11.14	0.46119	0.0875	11.1	0.490389	0.0875
pep:novel chromosome:ASM18318v1:Chromosome:70585:71085:1 gene:MHP168_063 transcript:ADQ90286 description: Tyrosyl-tRNA synthetase	ADQ90286	20 kDa	10	5	4	0.23	0.043	0.25		9.57	0.417856	0.0104	9.54	0.430553	0.0104	9.54	0.4194	0.0104	9.93	0.457653	0.163	9.53	0.460704	0.163	9.94	0.497629	0.163
pep:novel chromosome:ASM18318v1:Chromosome:186867:188321:-1 gene:MHP168_168 transcript:ADQ90383 description: Hexosephosphate transport protein	ADQ90383	55 kDa	27	6	4	0.07	0.043	-0.3		9.83	0.4192	0.0392	9.78	0.433907	0.0392	9.89	0.502326	0.0392	9.54	0.585391	0.0803	9.42	0.425646	0.0803	9.65	0.470733	0.0803
pep:novel chromosome:ASM18318v1:Chromosome:420555:420791:1 gene:MHP168_349 transcript:ADQ90555 description: Putative uncharacterized protein	ADQ90555	9 kDa	78	6	4	0.49	0.043	0.2		10.32	0.441347	0.088	10.16	0.455292	0.088	10.41	0.406052	0.088	10.36	0.70344	0.138	10.72	0.4335	0.138	10.39	0.464128	0.138
pep:novel chromosome:ASM18318v1:Chromosome:557772:559574:-1 gene:MHP168_454 transcript:ADQ90654 description: Putative uncharacterized protein	ADQ90654	69 kDa	5	4	4	0.067	0.043	-0.89		9.87	0.52144	0.0526	9.76	0.778003	0.0526	9.73	0.774388	0.0526	8.65	0.738345	0.123	8.91	0.694015	0.123	8.99	0.596591	0.123
pep:novel chromosome:ASM18318v1:Chromosome:586979:587548:-1 gene:MHP168_462 transcript:ADQ90660 description: ABC transporter ATP-binding protein	ADQ90660	21 kDa	6	4	4	0.32	0.043	0.29		9.17	0.424082	0.0177	9.21	0.527736	0.0177	9.16	0.632002	0.0177	9.58	0.480015	0.0766	9.36	0.462636	0.0766	9.46	0.451549	0.0766
pep:novel chromosome:ASM40085v1:Chromosome:546918:548288:-1 gene:MHP168L_444 transcript:AGM22221 description: hypothetical protein	AGM22221	52 kDa	5	4	4	0.086	0.043	-0.29		9.8	0.481776	0.0465	9.77	0.493672	0.0465	9.9	0.457593	0.0465	9.45	0.432967	0.0622	9.54	0.466024	0.0622	9.63	0.557341	0.0622
pep:novel chromosome:ASM40085v1:Chromosome:789440:790795:1 gene:MHP168L_614 transcript:AGM22380 description: ABC transporter xylose-binding lipoprotein	AGM22380	50 kDa	272	56	26	0.57	0.046	0.08		10.42	0.465105	0.0221	10.44	0.498331	0.0221	10.48	0.553302	0.0221	10.54	0.627711	0.02	10.5	0.520872	0.02	10.56	0.488628	0.02
pep:novel chromosome:ASM18318v1:Chromosome:56313:57146:1 gene:MHP168_051 transcript:ADQ90274 description: ATP synthase gamma chain	ADQ90274	32 kDa	12	6	5	0.22	0.047	0.14		8.93	0.487246	0.0454	8.83	0.471931	0.0454	8.95	0.485896	0.0454	9.09	0.503343	0.0949	8.89	0.469224	0.0949	9.15	0.455074	0.0949
pep:novel chromosome:ASM18318v1:Chromosome:400214:401836:1 gene:MHP168_330 transcript:ADQ90536 description: ABC transporter ATP-binding protein	ADQ90536	62 kDa	13	8	7	0.14	0.048	0.26		9.28	0.452918	0.0576	9.11	0.551778	0.0576	9.21	0.578612	0.0576	9.5	0.446221	0.0328	9.49	0.447688	0.0328	9.41	0.470554	0.0328
pep:novel chromosome:ASM18318v1:Chromosome:611877:613658:-1 gene:MHP168_480 transcript:ADQ90676 description: Putative uncharacterized protein	ADQ90676	69 kDa	29	18	13	0.26	0.048	0.13		9.12	0.443348	0.0591	9.13	0.505292	0.0591	9.27	0.528411	0.0591	9.24	0.470386	0.0395	9.35	0.463072	0.0395	9.29	0.47094	0.0395
pep:novel chromosome:ASM18318v1:Chromosome:104811:105602:1 gene:MHP168_090 transcript:ADQ90311 description: GTP-binding protein	ADQ90311	30 kDa	3	3	3	0.11	0.05	0.99		9.06	0.489813	0.129	8.69	0.443418	0.129	8.89	0.495567	0.129	10.04	0.478888	0.118	9.71	0.508682	0.118	9.83	0.469721	0.118
pep:novel chromosome:ASM18318v1:Chromosome:153528:153755:1 gene:MHP168_131 transcript:ADQ90348 description: translation initiation factor IF-1	ADQ90348	9 kDa	22	5	3	0.49	0.05	-0.35		11.2	0.45741	0.0737	11.34	0.464979	0.0737	11.14	0.47399	0.0737	10.93	0.45863	0.0664	10.95	0.462598	0.0664	10.77	0.48916	0.0664
pep:novel chromosome:ASM18318v1:Chromosome:171306:171956:1 gene:MHP168_152 transcript:ADQ90369 description: ribulose-phosphate 3-epimerase	ADQ90369	25 kDa	7	4	3	0.18	0.05	0.53		8.19	0.451733	0.174	7.69	0.582475	0.174	7.96	0.453369	0.174	8.67	0.522912	0.111	8.37	0.459068	0.111	8.43	0.554984	0.111
pep:novel chromosome:ASM18318v1:Chromosome:193846:194637:1 gene:MHP168_176 transcript:ADQ90391 description: hypothetical protein	ADQ90391	30 kDa	5	5	3	0.12	0.05	0.44		9.01	0.466011	0.115	8.72	0.437231	0.115	9.01	0.439401	0.115	9.5	0.461658	0.0905	9.24	0.461386	0.0905	9.33	0.477299	0.0905
pep:novel chromosome:ASM18318v1:Chromosome:307241:307513:1 gene:MHP168_263 transcript:ADQ90474 description: 30S ribosomal protein S20	ADQ90474	10 kDa	51	7	3	0.32	0.05	-0.26		9.97	0.486437	0.0321	10.05	0.672783	0.0321	10.05	0.472324	0.0321	9.55	0.516967	0.34	10.4	0.787485	0.34	9.59	0.482293	0.34
pep:novel chromosome:ASM18318v1:Chromosome:335832:336785:1 gene:MHP168_288 transcript:ADQ90497 description: hypothetical protein	ADQ90497	37 kDa	4	3	3	0.11	0.05	0.19		9.52	0.418495	0.0377	9.41	0.414138	0.0377	9.44	0.409032	0.0377	9.56	0.40356	0.125	9.54	0.635225	0.125	9.86	0.712201	0.125
pep:novel chromosome:ASM18318v1:Chromosome:417910:419382:-1 gene:MHP168_347 transcript:ADQ90553 description: hypothetical protein	ADQ90553	58 kDa	36	19	15	0.33	0.05	0.2		8.58	0.503387	0.143	8.97	0.536022	0.143	8.9	0.441147	0.143	8.96	0.447113	0.0632	8.98	0.444165	0.0632	9.13	0.57926	0.0632
pep:novel chromosome:ASM18318v1:Chromosome:547525:549480:-1 gene:MHP168_445 transcript:ADQ90647 description: Putative uncharacterized protein	ADQ90647	76 kDa	24	14	12	0.2	0.05	0.16		9.68	0.504335	0.0877	9.93	0.470277	0.0877	9.81	0.450973	0.0877	9.98	0.536388	0.0187	9.94	0.443539	0.0187	9.99	0.473799	0.0187
pep:novel chromosome:ASM18318v1:Chromosome:613839:614753:1 gene:MHP168_481 transcript:ADQ90677 description: L-lactate dehydrogenase	ADQ90677	35 kDa	9	5	3	0.086	0.05	0.28		8.76	0.412045	0.0363	8.68	0.428248	0.0363	8.78	0.418986	0.0363	9.02	0.423533	0.108	9.16	0.413864	0.108	8.85	0.47703	0.108
pep:novel chromosome:ASM18318v1:Chromosome:633486:634094:-1 gene:MHP168_498 transcript:ADQ90694 description: Putative uncharacterized protein	ADQ90694	22 kDa	6	3	3	0.16	0.05	0.99		9.37	0.408684	0.0987	9.24	0.488495	0.0987	9.09	0.439071	0.0987	10.27	0.42329	0.127	10.03	0.409548	0.127	10.39	0.423376	0.127
pep:novel chromosome:ASM18318v1:Chromosome:704003:704440:-1 gene:MHP168_539 transcript:ADQ90735 description: Peptide methionine sulfoxide reductase	ADQ90735	17 kDa	21	5	3	0.14	0.05	-0.25		11.23	0.4347	0.0178	11.28	0.419232	0.0178	11.27	0.437359	0.0178	11	0.665717	0.0876	11.12	0.419879	0.0876	10.87	0.497882	0.0876
pep:novel chromosome:ASM18318v1:Chromosome:714692:715183:1 gene:MHP168_548 transcript:ADQ90744 description: hypothetical protein	ADQ90744	19 kDa	5	3	3	0.15	0.05	0.6		8.61	0.461904	0.0897	8.39	0.524506	0.0897	8.38	0.634369	0.0897	9.19	0.467896	0.0881	9.09	0.505223	0.0881	8.93	0.467202	0.0881
pep:novel chromosome:ASM18318v1:Chromosome:750198:751979:-1 gene:MHP168_582 transcript:ADQ90775 description: PTS system, N-acetylglucosamine-specific II ABC component	ADQ90775	66 kDa	18	5	3	0.049	0.05	-0.7		8.36	0.495951	0.148	8.73	0.495411	0.148	8.73	0.557675	0.148	8	0.477951	0.166	8.15	0.697225	0.166	7.68	0.469613	0.166
pep:novel chromosome:ASM18318v1:Chromosome:828208:829818:1 gene:MHP168_635 transcript:ADQ90825 description: ABC transporter ATP-binding-Pr1-like protein	ADQ90825	63 kDa	4	3	3	0.045	0.05	0.54		6.22	0.502253	0.108	6.52	0.878656	0.108	6.29	0.945272	0.108	6.86	0.498549	0.0263	6.83	0.500725	0.0263	6.9	0.52263	0.0263
pep:novel chromosome:ASM18318v1:Chromosome:849543:850718:-1 gene:MHP168_656 transcript:ADQ90844 description: Putative uncharacterized protein	ADQ90844	44 kDa	4	3	3	0.077	0.05	0.7		9.69	0.402077	0.0941	9.58	0.389338	0.0941	9.85	0.385955	0.0941	10.49	0.466654	0.0746	10.44	0.418253	0.0746	10.28	0.465614	0.0746
pep:novel chromosome:ASM18318v1:Chromosome:131646:132344:1 gene:MHP168_106 transcript:ADQ90326 description: Triosephosphate isomerase	ADQ90326	26 kDa	38	19	11	0.56	0.053	0.2		10.41	0.433437	0.0119	10.45	0.446147	0.0119	10.43	0.478926	0.0119	10.64	0.52943	0.0368	10.57	0.492078	0.0368	10.68	0.435069	0.0368
pep:novel chromosome:ASM18318v1:Chromosome:364347:366227:-1 gene:MHP168_309 transcript:ADQ90516 description: Putative uncharacterized protein	ADQ90516	75 kDa	17	11	11	0.18	0.053	-0.23		9.23	0.482024	0.0393	9.2	0.533443	0.0393	9.31	0.531719	0.0393	9.19	0.548966	0.122	8.84	0.522416	0.122	9.05	0.506888	0.122
pep:novel chromosome:ASM18318v1:Chromosome:343761:346862:-1 gene:MHP168_293 transcript:ADQ90502 description: P97-like protein	ADQ90502	120 kDa	61	38	30	0.34	0.055	-0.07		9.7	0.449229	0.02	9.7	0.494582	0.02	9.65	0.472067	0.02	9.67	0.483637	0.0312	9.58	0.479347	0.0312	9.61	0.508718	0.0312
pep:novel chromosome:ASM18318v1:Chromosome:618874:619959:-1 gene:MHP168_486 transcript:ADQ90682 description: Putative uncharacterized protein	ADQ90682	43 kDa	31	15	12	0.31	0.057	0.09		9.41	0.438153	0.0172	9.36	0.487002	0.0172	9.38	0.47287	0.0172	9.49	0.463379	0.0207	9.44	0.458799	0.0207	9.49	0.499848	0.0207
pep:novel chromosome:ASM18318v1:Chromosome:170468:171325:1 gene:MHP168_151 transcript:ADQ90368 description: Putative ribosome biogenesis GTPase rsgA	ADQ90368	33 kDa	12	10	9	0.34	0.058	0.19		9.31	0.471139	0.0473	9.26	0.542491	0.0473	9.18	0.497373	0.0473	9.34	0.506241	0.123	9.34	0.538602	0.123	9.64	0.534916	0.123
pep:novel chromosome:ASM18318v1:Chromosome:847741:849132:-1 gene:MHP168_653 transcript:ADQ90841 description: Replicative DNA helicase	ADQ90841	53 kDa	22	13	9	0.25	0.058	0.16		8.61	0.509552	0.0376	8.68	0.530789	0.0376	8.58	0.58296	0.0376	8.83	0.509608	0.0379	8.83	0.546013	0.0379	8.73	0.492037	0.0379
pep:novel chromosome:ASM18318v1:Chromosome:83043:84167:1 gene:MHP168_070 transcript:ADQ90293 description: Chaperone protein dnaJ	ADQ90293	42 kDa	58	28	13	0.38	0.061	-0.15		9.75	0.453178	0.0228	9.78	0.478455	0.0228	9.81	0.529279	0.0228	9.57	0.542397	0.042	9.65	0.473751	0.042	9.68	0.561614	0.042
pep:novel chromosome:ASM18318v1:Chromosome:524026:525375:1 gene:MHP168_426 transcript:ADQ90628 description: Asparaginyl-tRNA synthetase	ADQ90628	52 kDa	75	31	20	0.5	0.066	-0.13		9.35	0.474775	0.0368	9.25	0.514141	0.0368	9.28	0.490457	0.0368	9.18	0.519461	0.0443	9.12	0.526465	0.0443	9.25	0.555864	0.0443
pep:novel chromosome:ASM18318v1:Chromosome:347362:348042:1 gene:MHP168_294 transcript:ADQ90503 description: Phenylalanyl-tRNA synthetase alpha chain	ADQ90503	26 kDa	20	14	10	0.5	0.07	0.18		9	0.465858	0.0311	8.92	0.489375	0.0311	9	0.529374	0.0311	9.16	0.515888	0.124	8.99	0.507619	0.124	9.34	0.541375	0.124
pep:novel chromosome:ASM18318v1:Chromosome:191234:191533:-1 gene:MHP168_172 transcript:ADQ90387 description: 50S ribosomal protein L21	ADQ90387	11 kDa	15	8	5	0.48	0.076	-0.15		10.77	0.493226	0.073	10.91	0.430702	0.073	10.97	0.480171	0.073	10.79	0.443413	0.0363	10.68	0.443417	0.0363	10.72	0.517075	0.0363
pep:novel chromosome:ASM18318v1:Chromosome:854064:856103:1 gene:MHP168_658 transcript:ADQ90846 description: excinuclease ABC subunit B	ADQ90846	78 kDa	9	6	6	0.088	0.078	0.07		8.4	0.462297	0.0671	8.3	0.614282	0.0671	8.49	0.477551	0.0671	8.48	0.499428	0.0216	8.5	0.462708	0.0216	8.54	0.467432	0.0216
pep:novel chromosome:ASM18318v1:Chromosome:147461:147925:1 gene:MHP168_717 transcript:ADQ90898 description: 50S ribosomal protein L5	ADQ90898	17 kDa	69	19	10	0.64	0.082	-0.14		10.05	0.423577	0.0505	9.93	0.452874	0.0505	10.06	0.466236	0.0505	9.83	0.534714	0.0347	9.87	0.503716	0.0347	9.93	0.446741	0.0347
pep:novel chromosome:ASM18318v1:Chromosome:484170:485843:-1 gene:MHP168_398 transcript:ADQ90600 description: hypothetical protein	ADQ90600	65 kDa	24	12	11	0.22	0.082	0.12		9.29	0.502691	0.0789	9.46	0.43545	0.0789	9.51	0.537301	0.0789	9.64	0.540562	0.0558	9.49	0.505485	0.0558	9.51	0.502084	0.0558
pep:novel chromosome:ASM18318v1:Chromosome:493824:494264:-1 gene:MHP168_407 transcript:ADQ90609 description: Protein mraZ	ADQ90609	17 kDa	64	21	11	0.68	0.082	0.13		11.37	0.406708	0.0421	11.34	0.422508	0.0421	11.25	0.482715	0.0421	11.49	0.537312	0.0553	11.5	0.479842	0.0553	11.36	0.435008	0.0553
pep:novel chromosome:ASM18318v1:Chromosome:80964:82832:1 gene:MHP168_069 transcript:ADQ90292 description: Chaperone protein dnaK	ADQ90292	68 kDa	794	91	36	0.51	0.083	-0.1		9.83	0.449456	0.0549	9.78	0.466729	0.0549	9.94	0.552416	0.0549	9.71	0.650284	0.0578	9.85	0.561669	0.0578	9.7	0.526376	0.0578
pep:novel chromosome:ASM18318v1:Chromosome:327629:328213:1 gene:MHP168_279 transcript:ADQ90488 description: Recombination protein recR	ADQ90488	22 kDa	6	4	4	0.2	0.083	0.21		10.59	0.406815	0.0481	10.45	0.41535	0.0481	10.49	0.414303	0.0481	10.8	0.434911	0.0569	10.64	0.408804	0.0569	10.73	0.443483	0.0569
pep:novel chromosome:ASM18318v1:Chromosome:84226:84915:1 gene:MHP168_071 transcript:ADQ90294 description: Cytidylate kinase	ADQ90294	27 kDa	21	12	7	0.34	0.11	-0.21		9.28	0.480914	0.0677	9.46	0.476836	0.0677	9.43	0.552879	0.0677	9.11	0.568934	0.0744	9.14	0.501442	0.0744	9.31	0.476093	0.0744
pep:novel chromosome:ASM18318v1:Chromosome:84933:86234:1 gene:MHP168_073 transcript:ADQ90295 description: GTP-binding protein engA	ADQ90295	50 kDa	12	8	7	0.15	0.11	0.17		8.9	0.457681	0.0366	9	0.486317	0.0366	8.98	0.52371	0.0366	9.12	0.531436	0.0252	9.18	0.533178	0.0252	9.11	0.481105	0.0252
pep:novel chromosome:ASM18318v1:Chromosome:100573:103524:-1 gene:MHP168_088 transcript:ADQ90310 description: Protein translocase subunit secA	ADQ90310	112 kDa	145	64	41	0.46	0.11	-0.05		9.68	0.457588	0.0473	9.68	0.471288	0.0473	9.8	0.476578	0.0473	9.64	0.521752	0.025	9.71	0.498289	0.025	9.66	0.478518	0.025
pep:novel chromosome:ASM18318v1:Chromosome:436313:438700:-1 gene:MHP168_364 transcript:ADQ90568 description: ABC transporter ATP binding protein	ADQ90568	91 kDa	31	19	14	0.21	0.11	-0.08		9.65	0.43004	0.00298	9.66	0.469219	0.00298	9.65	0.474373	0.00298	9.62	0.459027	0.0282	9.55	0.448136	0.0282	9.55	0.448058	0.0282
pep:novel chromosome:ASM18318v1:Chromosome:4636:5094:1 gene:MHP168_004 transcript:ADQ90232 description: Ribosomal RNA large subunit methyltransferase H	ADQ90232	18 kDa	2	2	2	0.13	0.12	-0.74		10.11	0.408344	0.0442	10.23	0.394992	0.0442	10.22	0.392726	0.0442	9.4	0.409373	0.124	9.64	0.436264	0.124	9.28	0.606724	0.124
pep:novel chromosome:ASM18318v1:Chromosome:24828:25652:-1 gene:MHP168_022 transcript:ADQ90247 description: Putative uncharacterized protein	ADQ90247	31 kDa	3	2	2	0.069	0.12	-1.08		9.63	0.634306	0.029	9.6	0.48444	0.029	9.69	0.48684	0.029	8.63	0.478892	0.153	8.33	0.551236	0.153	8.76	0.810579	0.153
pep:novel chromosome:ASM18318v1:Chromosome:25970:26452:1 gene:MHP168_023 transcript:ADQ90248 description: signal peptidase I	ADQ90248	18 kDa	3	2	2	0.16	0.12	-0.67		8.51	0.507613	0.042	8.61	0.457591	0.042	8.5	0.44052	0.042	7.95	0.49781	0.0466	7.83	0.432205	0.0466	7.85	0.49191	0.0466
pep:novel chromosome:ASM18318v1:Chromosome:58539:58826:1 gene:MHP168_053 transcript:ADQ90276 description: Predicted protein	ADQ90276	11 kDa	11	4	2	0.23	0.12	-0.26		9.86	0.489158	0.0307	9.95	0.507978	0.0307	9.93	0.444437	0.0307	9.58	0.540892	0.0423	9.65	0.503129	0.0423	9.7	0.460284	0.0423
pep:novel chromosome:ASM18318v1:Chromosome:68227:69000:1 gene:MHP168_061 transcript:ADQ90284 description: Putative uncharacterized protein	ADQ90284	30 kDa	2	2	2	0.078	0.12	-0.34		9.76	0.396276	0.117	9.58	0.442923	0.117	9.92	0.404256	0.117	9.5	0.395699	0.124	9.22	0.395855	0.124	9.55	0.404979	0.124
pep:novel chromosome:ASM18318v1:Chromosome:88662:89609:1 gene:MHP168_077 transcript:ADQ90299 description: hypothetical protein	ADQ90299	38 kDa	3	3	2	0.073	0.12	-0.39		9.11	0.422158	0.206	8.82	0.417304	0.206	9.41	0.44351	0.206	8.74	0.531921	0.0853	8.82	0.510175	0.0853	8.58	0.552843	0.0853
pep:novel chromosome:ASM18318v1:Chromosome:97871:99154:-1 gene:MHP168_086 transcript:ADQ90308 description: Thymidine phosphorylase	ADQ90308	47 kDa	85	39	20	0.48	0.12	1.06		10.01	0.501926	0.141	9.7	1.29798	0.141	9.63	0.964471	0.141	11.04	0.749614	0.0147	11.03	0.451119	0.0147	11	0.613531	0.0147
pep:novel chromosome:ASM18318v1:Chromosome:109734:109982:1 gene:MHP168_094 transcript:ADQ90314 description: Putative uncharacterized protein	ADQ90314	10 kDa	113	6	2	0.48	0.12	0.47		10.39	0.475838	0.0642	10.31	0.602314	0.0642	10.49	0.458833	0.0642	10.74	0.566654	0.142	11.11	0.478955	0.142	10.77	0.471312	0.142
pep:novel chromosome:ASM18318v1:Chromosome:161805:162500:-1 gene:MHP168_141 transcript:ADQ90358 description: hypothetical protein	ADQ90358	28 kDa	2	2	2	0.078	0.12	0.23		9.43	0.411077	0.0402	9.37	0.403828	0.0402	9.31	0.406227	0.0402	9.67	0.405104	0.144	9.35	0.47385	0.144	9.74	0.433616	0.144
pep:novel chromosome:ASM18318v1:Chromosome:178328:178852:-1 gene:MHP168_160 transcript:ADQ90376 description: TRNA/rRNA methyltransferase	ADQ90376	20 kDa	3	2	2	0.1	0.12	0.4		9.62	0.394575	0.0906	9.36	0.426623	0.0906	9.46	0.409372	0.0906	9.75	0.394586	0.162	9.74	0.483628	0.162	10.15	0.408257	0.162
pep:novel chromosome:ASM18318v1:Chromosome:191685:192344:1 gene:MHP168_173 transcript:ADQ90388 description: Uracil-DNA glycosylase	ADQ90388	26 kDa	5	2	2	0.082	0.12	0.29		9.71	0.469822	0.0174	9.71	0.461135	0.0174	9.66	0.396313	0.0174	9.98	0.421591	0.0948	9.85	0.402202	0.0948	10.12	0.478815	0.0948
pep:novel chromosome:ASM18318v1:Chromosome:224720:225403:-1 gene:MHP168_199 transcript:ADQ90413 description: Ribosomal RNA small subunit methyltransferase E	ADQ90413	26 kDa	2	2	2	0.11	0.12	0.94		7.73	0.527713	0.204	7.38	1.13692	0.204	7.15	0.713881	0.204	8.3	0.64498	0.253	8.76	0.473253	0.253	8.05	0.536533	0.253
pep:novel chromosome:ASM18318v1:Chromosome:351095:351937:1 gene:MHP168_297 transcript:ADQ90505 description: tRNA pseudouridine synthase B	ADQ90505	32 kDa	3	2	2	0.061	0.12	-0.37		9.66	0.410588	0.0945	9.81	0.488813	0.0945	9.53	0.479193	0.0945	8.94	0.549664	0.532	9.12	0.43094	0.532	10.27	0.882374	0.532
pep:novel chromosome:ASM18318v1:Chromosome:352762:353607:1 gene:MHP168_300 transcript:ADQ90507 description: Riboflavin biosynthesis protein	ADQ90507	33 kDa	3	2	2	0.071	0.12	-0.29		6.57	0.625229	0.15	6.98	0.478039	0.15	6.68	0.51941	0.15	6.2	0.689715	0.173	6.7	0.585697	0.173	6.45	0.506112	0.173
pep:novel chromosome:ASM18318v1:Chromosome:403485:404918:-1 gene:MHP168_332 transcript:ADQ90538 description: Putative permease, putative mpn421	ADQ90538	54 kDa	2	2	2	0.042	0.12	0.49		8.55	0.411099	0.148	8.13	0.647559	0.148	8.38	0.615009	0.148	8.4	0.466309	0.667	8.78	0.448944	0.667	10.07	1.65201	0.667
pep:novel chromosome:ASM18318v1:Chromosome:405248:405496:1 gene:MHP168_333 transcript:ADQ90539 description: Putative uncharacterized protein	ADQ90539	10 kDa	107	17	6	0.48	0.12	0.53		10.32	0.518414	0.0545	10.23	0.568554	0.0545	10.39	0.423197	0.0545	10.73	0.506242	0.141	11.09	0.50009	0.141	10.75	0.466428	0.141
pep:novel chromosome:ASM18318v1:Chromosome:457470:459116:-1 gene:MHP168_380 transcript:ADQ90584 description: Putative uncharacterized protein	ADQ90584	64 kDa	2	2	2	0.027	0.12	-0.22		10.25	0.385774	0.0946	10.52	0.386604	0.0946	10.32	0.426116	0.0946	9.95	0.386643	0.118	10.25	0.38805	0.118	10.22	0.38512	0.118
pep:novel chromosome:ASM18318v1:Chromosome:460902:462458:1 gene:MHP168_383 transcript:ADQ90585 description: Amino acid permease	ADQ90585	57 kDa	6	2	2	0.037	0.12	0.63		8.32	0.465003	0.0507	8.17	0.455781	0.0507	8.22	0.498626	0.0507	8.91	0.611995	0.079	8.74	0.45734	0.079	8.96	0.543528	0.079
pep:novel chromosome:ASM18318v1:Chromosome:597395:597616:1 gene:MHP168_466 transcript:ADQ90664 description: 50S ribosomal protein L31	ADQ90664	8 kDa	5	2	2	0.42	0.12	-0.18		10.56	0.411848	0.0819	10.36	0.42719	0.0819	10.56	0.426431	0.0819	10.3	0.416704	0.0674	10.42	0.457261	0.0674	10.23	0.39592	0.0674
pep:novel chromosome:ASM18318v1:Chromosome:614828:616564:1 gene:MHP168_482 transcript:ADQ90678 description: Phosphoenolpyruvate protein phosphotransferase	ADQ90678	65 kDa	128	4	2	0.47	0.12	1.83		9.3	0.450315	0.253	8.99	0.538363	0.253	8.58	0.658535	0.253	10.89	0.556389	0.115	10.91	0.458427	0.115	10.62	0.502049	0.115
pep:novel chromosome:ASM18318v1:Chromosome:679400:679996:1 gene:MHP168_525 transcript:ADQ90721 description: hypothetical protein	ADQ90721	24 kDa	3	2	2	0.096	0.12	-0.47		9.84	0.456628	0.11	10.01	0.526357	0.11	9.7	0.415086	0.11	9.54	0.432201	0.186	9.07	0.423184	0.186	9.52	0.474602	0.186
pep:novel chromosome:ASM18318v1:Chromosome:736611:737066:-1 gene:MHP168_565 transcript:ADQ90761 description: PTS system enzyme IIA component	ADQ90761	17 kDa	3	3	2	0.12	0.12	1.69		9.39	0.400926	0.163	9.07	0.408938	0.163	8.93	0.432346	0.163	10.83	0.420001	0.202	10.53	0.396298	0.202	11.1	0.398999	0.202
pep:novel chromosome:ASM18318v1:Chromosome:745828:746490:1 gene:MHP168_577 transcript:ADQ90770 description: Putative uncharacterized protein	ADQ90770	25 kDa	6	5	5	0.31	0.12	0.23		8.68	0.56086	0.11	8.68	0.456473	0.11	8.41	0.665546	0.11	8.62	0.505155	0.132	8.95	0.535934	0.132	8.94	0.481988	0.132
pep:novel chromosome:ASM18318v1:Chromosome:763087:763377:-1 gene:MHP168_741 transcript:ADQ90918 description: hypothetical protein	ADQ90918	11 kDa	3	2	2	0.2	0.12	-0.17		9.91	0.407599	0.0899	9.99	0.395351	0.0899	9.74	0.418062	0.0899	9.8	0.391989	0.104	9.54	0.390688	0.104	9.79	0.410689	0.104
pep:novel chromosome:ASM18318v1:Chromosome:776598:776900:1 gene:MHP168_602 transcript:ADQ90795 description: Probable exported protein	ADQ90795	11 kDa	19	5	2	0.19	0.12	0.37		9.81	0.426094	0.0352	9.71	0.443524	0.0352	9.77	0.453808	0.0352	10.12	0.477675	0.0155	10.16	0.484637	0.0155	10.12	0.498828	0.0155
pep:novel chromosome:ASM18318v1:Chromosome:794811:795722:1 gene:MHP168_617 transcript:ADQ90807 description: sugar ABC transporter permease protein	ADQ90807	33 kDa	3	2	2	0.092	0.12	1.08		11.06	0.531619	0.129	10.7	0.456177	0.129	10.91	0.426299	0.129	12.17	0.407992	0.132	11.81	0.555294	0.132	11.88	0.453799	0.132
pep:novel chromosome:ASM18318v1:Chromosome:819232:820881:-1 gene:MHP168_630 transcript:ADQ90820 description: DNA adenine methylase	ADQ90820	65 kDa	2	2	2	0.033	0.12	0.64		9.92	0.399363	0.0447	9.82	0.410149	0.0447	9.81	0.618315	0.0447	10.59	0.391443	0.0887	10.5	0.395958	0.0887	10.34	0.480397	0.0887
pep:novel chromosome:ASM18318v1:Chromosome:829827:831443:1 gene:MHP168_637 transcript:ADQ90826 description: Putative ABC transporter ATP-binding-Pr2-like protein	ADQ90826	63 kDa	3	2	2	0.032	0.12	0.45		9.48	0.425757	0.0259	9.55	0.462689	0.0259	9.48	0.478246	0.0259	9.96	0.465744	0.0524	9.88	0.431957	0.0524	10.03	0.410306	0.0524
pep:novel chromosome:ASM18318v1:Chromosome:849125:849562:-1 gene:MHP168_654 transcript:ADQ90842 description: 50S ribosomal protein L9	ADQ90842	16 kDa	14	4	2	0.26	0.12	0.55		9.13	0.474336	0.0717	8.93	0.507179	0.0717	9.05	0.462687	0.0717	9.61	0.47074	0.0581	9.5	0.521908	0.0581	9.66	0.463904	0.0581
pep:novel chromosome:ASM18318v1:Chromosome:913915:914880:1 gene:MHP168_699 transcript:ADQ90881 description: Putative uncharacterized protein	ADQ90881	37 kDa	4	2	2	0.05	0.12	-0.31		9.73	0.5124	0.0563	9.61	0.472964	0.0563	9.77	0.480789	0.0563	9.46	0.454749	0.0501	9.32	0.424108	0.0501	9.41	0.57097	0.0501
pep:novel chromosome:ASM40085v1:Chromosome:616114:617850:1 gene:MHP168L_482 transcript:AGM22254 description: Phosphoenolpyruvate protein phosphotransferase	AGM22254	64 kDa	126	45	26	0.47	0.12	-1.49		10.72	0.76733	0.148	10.81	0.924863	0.148	11.12	0.650317	0.148	9.45	0.921114	0.0102	9.48	0.963139	0.0102	9.45	0.70112	0.0102
pep:novel chromosome:ASM18318v1:Chromosome:754307:755134:1 gene:MHP168_587 transcript:ADQ90780 description: DNA glycosylase	ADQ90780	32 kDa	3	3	3	0.095	0.13	0.17		9.19	0.446075	0.148	8.8	0.576687	0.148	8.85	0.444472	0.148	9.23	0.542578	0.0738	9.03	0.619771	0.0738	9.09	0.533848	0.0738
pep:novel chromosome:ASM18318v1:Chromosome:757985:760930:-1 gene:MHP168_591 transcript:ADQ90784 description: DNA polymerase III alpha subunit	ADQ90784	114 kDa	23	17	14	0.14	0.13	0.05		8.89	0.455885	0.0115	8.89	0.563282	0.0115	8.86	0.526916	0.0115	8.94	0.46657	0.0257	8.9	0.559972	0.0257	8.97	0.481076	0.0257
pep:novel chromosome:ASM18318v1:Chromosome:858905:860152:-1 gene:MHP168_663 transcript:ADQ90851 description: Putative uncharacterized protein	ADQ90851	49 kDa	5	3	3	0.08	0.13	0.48		9.76	0.497371	0.021	9.76	0.505913	0.021	9.81	0.502061	0.021	10.27	0.469456	0.0784	10.13	0.479664	0.0784	10.36	0.449075	0.0784
pep:novel chromosome:ASM18318v1:Chromosome:868390:870060:1 gene:MHP168_672 transcript:ADQ90858 description: Putative uncharacterized protein	ADQ90858	65 kDa	5	3	3	0.052	0.13	-0.16		10.2	0.411484	0.0496	10.35	0.417274	0.0496	10.28	0.419294	0.0496	10.06	0.509173	0.0726	10.22	0.402511	0.0726	10.03	0.452849	0.0726
pep:novel chromosome:ASM18318v1:Chromosome:353594:354409:-1 gene:MHP168_301 transcript:ADQ90508 description: Putative transcriptional regulator	ADQ90508	31 kDa	19	13	8	0.35	0.14	0.13		10.1	0.508203	0.0649	10.13	0.558098	0.0649	9.95	0.516893	0.0649	10.23	0.481466	0.113	10.01	0.518661	0.113	10.32	0.487808	0.113
pep:novel chromosome:ASM18318v1:Chromosome:699586:700200:-1 gene:MHP168_536 transcript:ADQ90732 description: Uracil phosphoribosyltransferase	ADQ90732	23 kDa	48	12	8	0.37	0.14	0.07		10.01	0.46259	0.0428	9.99	0.463925	0.0428	10.11	0.450028	0.0428	10.12	0.464642	0.0196	10.09	0.426004	0.0196	10.15	0.453452	0.0196
pep:novel chromosome:ASM18318v1:Chromosome:864084:867023:1 gene:MHP168_670 transcript:ADQ90856 description: Putative ABC transporter ATP-binding protein P115-like protein	ADQ90856	111 kDa	70	43	36	0.42	0.14	0.02		9.6	0.462508	0.0101	9.59	0.493047	0.0101	9.62	0.449567	0.0101	9.63	0.483929	0.0281	9.58	0.464622	0.0281	9.66	0.464384	0.0281
pep:novel chromosome:ASM18318v1:Chromosome:661578:662618:-1 gene:MHP168_511 transcript:ADQ90707 description: Oligopeptide ABC transporter permease protein	ADQ90707	39 kDa	14	6	4	0.1	0.15	-0.07		10.42	0.420478	0.0339	10.34	0.477205	0.0339	10.42	0.429544	0.0339	10.38	0.54532	0.0817	10.2	0.565931	0.0817	10.42	0.521976	0.0817
pep:novel chromosome:ASM18318v1:Chromosome:684574:686397:-1 gene:MHP168_530 transcript:ADQ90726 description: Oligoendopeptidase F	ADQ90726	71 kDa	185	52	28	0.48	0.16	0.04		9.7	0.465944	0.0324	9.62	0.488049	0.0324	9.7	0.473696	0.0324	9.75	0.519176	0.0355	9.65	0.484894	0.0355	9.74	0.466298	0.0355
pep:novel chromosome:ASM18318v1:Chromosome:712398:713108:-1 gene:MHP168_546 transcript:ADQ90742 description: Uridylate kinase	ADQ90742	26 kDa	41	18	13	0.53	0.16	0.03		10.64	0.457837	0.0368	10.55	0.51122	0.0368	10.55	0.502806	0.0368	10.55	0.520096	0.0644	10.65	0.494968	0.0644	10.74	0.488741	0.0644
pep:novel chromosome:ASM18318v1:Chromosome:700293:700958:-1 gene:MHP168_537 transcript:ADQ90733 description: Deoxyribose-phosphate aldolase	ADQ90733	24 kDa	34	14	9	0.57	0.17	0.1		9.42	0.454731	0.00652	9.41	0.443526	0.00652	9.4	0.509133	0.00652	9.61	0.563646	0.0581	9.45	0.459344	0.0581	9.48	0.478172	0.0581
pep:novel chromosome:ASM18318v1:Chromosome:447995:448696:-1 gene:MHP168_372 transcript:ADQ90576 description: Putative uncharacterized protein	ADQ90576	27 kDa	76	10	7	0.19	0.18	-0.16		9.73	0.465485	0.0725	9.84	0.459902	0.0725	9.94	0.484238	0.0725	9.53	0.563848	0.121	9.86	0.49409	0.121	9.62	0.523572	0.121
pep:novel chromosome:ASM18318v1:Chromosome:57164:58579:1 gene:MHP168_052 transcript:ADQ90275 description: ATP synthase subunit beta	ADQ90275	52 kDa	63	30	19	0.51	0.19	0.03		9.26	0.460464	0.019	9.24	0.488744	0.019	9.3	0.491494	0.019	9.28	0.49272	0.051	9.24	0.466002	0.051	9.38	0.48726	0.051
pep:novel chromosome:ASM18318v1:Chromosome:5108:6091:1 gene:MHP168_005 transcript:ADQ90233 description: Putative MgpA-like protein	ADQ90233	38 kDa	16	10	9	0.29	0.2	0.05		8.91	0.466972	0.101	8.75	0.476607	0.101	8.62	0.493388	0.101	8.86	0.45731	0.147	8.58	0.514044	0.147	8.99	0.558351	0.147
pep:novel chromosome:ASM18318v1:Chromosome:488383:489924:-1 gene:MHP168_402 transcript:ADQ90604 description: Methionyl-tRNA synthetase	ADQ90604	61 kDa	28	17	16	0.29	0.2	-0.1		9.63	0.445758	0.0137	9.61	0.482092	0.0137	9.65	0.501858	0.0137	9.61	0.504735	0.058	9.45	0.519227	0.058	9.49	0.505447	0.058
pep:novel chromosome:ASM18318v1:Chromosome:38412:39422:1 gene:MHP168_032 transcript:ADQ90256 description: Glyceraldehyde 3-phosphate dehydrogenase	ADQ90256	37 kDa	176	30	15	0.57	0.22	0.12		10.52	0.482739	0.0154	10.48	0.496033	0.0154	10.5	0.477601	0.0154	10.64	0.537763	0.0224	10.58	0.523711	0.0224	10.62	0.525886	0.0224
pep:novel chromosome:ASM18318v1:Chromosome:857578:858012:-1 gene:MHP168_661 transcript:ADQ90849 description: 50S ribosomal protein L13	ADQ90849	17 kDa	57	14	7	0.52	0.22	-0.09		10.7	0.438993	0.0756	10.65	0.458459	0.0756	10.86	0.409816	0.0756	10.62	0.476096	0.0111	10.64	0.462116	0.0111	10.65	0.424049	0.0111
pep:novel chromosome:ASM18318v1:Chromosome:442847:443860:-1 gene:MHP168_367 transcript:ADQ90571 description: Putative uncharacterized protein	ADQ90571	38 kDa	33	12	9	0.28	0.23	-0.11		9.99	0.48535	0.0299	10.07	0.497076	0.0299	10.01	0.458279	0.0299	9.76	0.539457	0.118	9.86	0.47783	0.118	10.09	0.475927	0.118
pep:novel chromosome:ASM18318v1:Chromosome:883935:885584:1 gene:MHP168_679 transcript:ADQ90865 description: Putative uncharacterized protein	ADQ90865	65 kDa	28	17	14	0.23	0.23	-0.1		9.95	0.418747	0.05	9.9	0.43928	0.05	10.04	0.474624	0.05	9.83	0.435609	0.0195	9.88	0.448287	0.0195	9.88	0.503855	0.0195
pep:novel chromosome:ASM18318v1:Chromosome:93479:93991:-1 gene:MHP168_082 transcript:ADQ90304 description: hypothetical protein	ADQ90304	20 kDa	10	4	4	0.24	0.25	0.25		8.97	0.449326	0.0643	8.81	0.484141	0.0643	8.96	0.47167	0.0643	9.31	0.55135	0.107	9	0.703909	0.107	9.14	0.432802	0.107
pep:novel chromosome:ASM18318v1:Chromosome:150679:152100:1 gene:MHP168_128 transcript:ADQ90345 description: Preprotein translocase SecY subunit	ADQ90345	53 kDa	4	4	4	0.089	0.25	0.14		8.24	0.693098	0.0971	8.5	0.473229	0.0971	8.46	0.441161	0.0971	8.67	0.469337	0.144	8.3	0.55078	0.144	8.64	0.446545	0.144
pep:novel chromosome:ASM18318v1:Chromosome:655789:656844:-1 gene:MHP168_507 transcript:ADQ90703 description: asparagine synthetase A	ADQ90703	41 kDa	7	5	4	0.1	0.25	-0.11		8.91	0.52283	0.0619	9.02	0.452032	0.0619	9.09	0.444664	0.0619	8.93	0.461766	0.0603	8.81	0.444962	0.0603	8.98	0.576215	0.0603
pep:novel chromosome:ASM18318v1:Chromosome:779936:781726:1 gene:MHP168_605 transcript:ADQ90798 description: Putative uncharacterized protein	ADQ90798	72 kDa	10	7	7	0.12	0.25	0.17		9.07	0.434353	0.0153	9.03	0.454876	0.0153	9.05	0.46162	0.0153	9.24	0.463532	0.017	9.22	0.484732	0.017	9.2	0.503213	0.017
pep:novel chromosome:ASM18318v1:Chromosome:789255:789812:1 gene:MHP168_612 transcript:ADQ90803 description: Inorganic pyrophosphatase	ADQ90803	22 kDa	95	21	8	0.53	0.25	0.05		9.89	0.489836	0.0377	9.86	0.531484	0.0377	9.79	0.487751	0.0377	9.94	0.521163	0.0301	9.87	0.490653	0.0301	9.87	0.482897	0.0301
pep:novel chromosome:ASM18318v1:Chromosome:835896:836633:1 gene:MHP168_640 transcript:ADQ90829 description: 1-acyl-sn-glycerol-3-phosphate acyltransferase	ADQ90829	29 kDa	12	9	6	0.24	0.26	0.09		9.67	0.402466	0.0334	9.63	0.475965	0.0334	9.72	0.47908	0.0334	9.86	0.461593	0.0738	9.65	0.412233	0.0738	9.78	0.454733	0.0738
pep:novel chromosome:ASM18318v1:Chromosome:1:1392:1 gene:MHP168_001 transcript:ADQ90229 description: Chromosomal replication initiator protein dnaA	ADQ90229	54 kDa	13	9	7	0.16	0.28	0.05		8.53	0.49395	0.0334	8.44	0.492047	0.0334	8.52	0.534496	0.0334	8.51	0.463933	0.0353	8.51	0.496875	0.0353	8.6	0.581081	0.0353
pep:novel chromosome:ASM18318v1:Chromosome:489917:490687:-1 gene:MHP168_403 transcript:ADQ90605 description: DNA methylase	ADQ90605	30 kDa	3	3	3	0.098	0.28	-0.62		9.17	0.683949	0.0993	9.29	0.660924	0.0993	9.46	0.555697	0.0993	8.84	0.747888	0.159	8.79	0.736756	0.159	8.42	0.555033	0.159
pep:novel chromosome:ASM18318v1:Chromosome:716075:717790:-1 gene:MHP168_551 transcript:ADQ90747 description: hypothetical protein	ADQ90747	67 kDa	3	3	3	0.046	0.28	0.18		7.37	0.488285	0.135	7.65	0.464679	0.135	7.74	0.484209	0.135	7.6	0.500525	0.14	7.72	0.477098	0.14	7.99	0.462533	0.14
pep:novel chromosome:ASM18318v1:Chromosome:787551:788414:1 gene:MHP168_610 transcript:ADQ90801 description: Putative uncharacterized protein	ADQ90801	34 kDa	3	3	3	0.087	0.28	-0.18		8.95	0.419299	0.0922	9.04	0.428625	0.0922	8.78	0.474649	0.0922	8.77	0.425744	0.0734	8.86	0.535346	0.0734	8.65	0.436472	0.0734
pep:novel chromosome:ASM18318v1:Chromosome:659376:660428:-1 gene:MHP168_509 transcript:ADQ90705 description: Oligopeptide ABC transporter ATP binding protein	ADQ90705	39 kDa	53	20	14	0.43	0.29	-0.03		10.06	0.502994	0.0222	10.09	0.459336	0.0222	10.13	0.442854	0.0222	10.11	0.528582	0.0387	10	0.451768	0.0387	10.09	0.50534	0.0387
pep:novel chromosome:ASM18318v1:Chromosome:7158:7727:1 gene:MHP168_007 transcript:ADQ90235 description: Putative uncharacterized protein	ADQ90235	23 kDa	6	3	1	0.053	0.32	-0.57		9.06	0.454934	0.0503	8.92	0.492025	0.0503	8.96	0.487874	0.0503	8.48	0.47509	0.126	8.21	0.499287	0.126	8.56	0.56257	0.126
pep:novel chromosome:ASM18318v1:Chromosome:53634:54179:1 gene:MHP168_048 transcript:ADQ90271 description: ATP synthase subunit b	ADQ90271	21 kDa	2	2	1	0.039	0.32	-0.15		11.24	0.399839	0.0783	11.05	0.385838	0.0783	11.26	0.38466	0.0783	11.11	0.374906	0.0643	11.06	0.382457	0.0643	10.93	0.517452	0.0643
pep:novel chromosome:ASM18318v1:Chromosome:78866:80416:-1 gene:MHP168_067 transcript:ADQ90290 description: Excinuclease ABC subunit C	ADQ90290	61 kDa	1	1	1	0.016	0.32	0.18		10.14	0	0.0716	10.27	0	0.0716	10.34	0	0.0716	10.45	0	0.138	10.61	0	0.138	10.22	0	0.138
pep:novel chromosome:ASM18318v1:Chromosome:86561:86791:1 gene:MHP168_075 transcript:ADQ90297 description: 30 kDa GTP-binding protein lepA	ADQ90297	9 kDa	2	1	1	0.18	0.32	-0.47		9.1	0.766715	0.0954	9.36	0.419444	0.0954	9.3	0.413301	0.0954	9.2	0.592318	0.24	8.53	0.519181	0.24	8.77	0.422729	0.24
pep:novel chromosome:ASM18318v1:Chromosome:92545:92889:-1 gene:MHP168_080 transcript:ADQ90302 description: 30S ribosomal protein S12	ADQ90302	13 kDa	1	1	1	0.061	0.32	-0.42		9.05	0	0.0866	8.83	0	0.0866	9.05	0	0.0866	8.53	0	0.645	9.5	0	0.645	7.8	0	0.645
pep:novel chromosome:ASM18318v1:Chromosome:96308:97690:1 gene:MHP168_085 transcript:ADQ90307 description: NADH oxidase	ADQ90307	51 kDa	168	1	1	0.4	0.32	2.51		10.45	0.501319	0.246	9.91	0.592476	0.246	9.8	0.543097	0.246	12.74	0.558399	0.111	12.42	0.507798	0.111	12.58	0.524218	0.111
pep:novel chromosome:ASM18318v1:Chromosome:110256:110972:1 gene:MHP168_095 transcript:ADQ90315 description: Putative uncharacterized protein	ADQ90315	27 kDa	1	1	1	0.055	0.32	0.35		8.43	0	0.547	8.83	0	0.547	7.4	0	0.547	8.65	0	0.116	8.51	0	0.116	8.85	0	0.116
pep:novel chromosome:ASM18318v1:Chromosome:145615:146025:1 gene:MHP168_716 transcript:ADQ90897 description: 50S ribosomal protein L16	ADQ90897	15 kDa	2	1	1	0.059	0.32	-0.23		12.52	0.379417	0.0516	12.59	0.379427	0.0516	12.44	0.394028	0.0516	12.17	0.400779	0.108	12.25	0.402438	0.108	12.47	0.385985	0.108
pep:novel chromosome:ASM18318v1:Chromosome:150236:150679:1 gene:MHP168_127 transcript:ADQ90344 description: 50S ribosomal protein L15	ADQ90344	17 kDa	35	2	1	0.52	0.32	1.63		10.22	0.669028	0.077	10.09	0.689531	0.077	10	0.797895	0.077	11.75	0.711242	0.0305	11.78	0.695216	0.0305	11.7	0.660932	0.0305
pep:novel chromosome:ASM18318v1:Chromosome:158408:159118:-1 gene:MHP168_137 transcript:ADQ90354 description: ribosomal large subunit pseudouridine synthase B	ADQ90354	28 kDa	1	1	1	0.064	0.32	0		7.39	0	0.436	6.36	0	0.436	7.42	0	0.436	7.37	0	0.178	6.86	0	0.178	7.13	0	0.178
pep:novel chromosome:ASM18318v1:Chromosome:159099:159527:-1 gene:MHP168_138 transcript:ADQ90355 description: hypothetical protein	ADQ90355	17 kDa	1	1	1	0.07	0.32	0.06		9.18	0	0.112	9.25	0	0.112	8.94	0	0.112	9.29	0	0.102	9.25	0	0.102	9.02	0	0.102
pep:novel chromosome:ASM18318v1:Chromosome:159520:160665:-1 gene:MHP168_139 transcript:ADQ90356 description: Nitrogen fixation protein	ADQ90356	43 kDa	2	2	1	0.047	0.32	0.13		8.21	0.5642	0.0618	8.03	0.537742	0.0618	8.14	0.460585	0.0618	7.92	0.912293	0.256	8.6	0.443185	0.256	8.04	0.576665	0.256
pep:novel chromosome:ASM18318v1:Chromosome:166410:166862:1 gene:MHP168_145 transcript:ADQ90362 description: Putative metalloprotease	ADQ90362	18 kDa	1	1	1	0.08	0.32	0.87		7.31	0	0.127	7.48	0	0.127	7.12	0	0.127	8.22	0	0.228	7.82	0	0.228	8.47	0	0.228
pep:novel chromosome:ASM18318v1:Chromosome:177583:178341:-1 gene:MHP168_159 transcript:ADQ90375 description: putative tRNA/rRNA methyltransferase	ADQ90375	29 kDa	2	1	1	0.044	0.32	-0.02		9.43	0.578061	0.0338	9.51	0.42972	0.0338	9.43	0.479874	0.0338	9.47	0.499889	0.0156	9.42	0.433315	0.0156	9.45	0.44305	0.0156
pep:novel chromosome:ASM18318v1:Chromosome:185795:186742:-1 gene:MHP168_167 transcript:ADQ90382 description: L-lactate dehydrogenase	ADQ90382	34 kDa	309	2	1	0.7	0.32	1.95		8.98	8.01907	0.127	8.74	1.35378	0.127	8.62	1.80781	0.127	10.76	1.3322	0.0408	10.64	1.37389	0.0408	10.67	1.57604	0.0408
pep:novel chromosome:ASM18318v1:Chromosome:197045:197239:1 gene:MHP168_179 transcript:ADQ90394 description: 50S ribosomal protein L35	ADQ90394	7 kDa	36	4	1	0.16	0.32	0		10.43	0.418793	0.0629	10.48	0.415754	0.0629	10.6	0.432343	0.0629	10.56	0.415202	0.0888	10.35	0.42645	0.0888	10.58	0.424309	0.0888
pep:novel chromosome:ASM18318v1:Chromosome:197693:197887:1 gene:MHP168_721 transcript:ADQ90902 description: 50S ribosomal protein L28	ADQ90902	7 kDa	3	2	1	0.17	0.32	-0.33		10.07	0.397388	0.121	10.19	0.399365	0.121	10.41	0.577331	0.121	9.85	0.397163	0.0624	9.81	0.416915	0.0624	9.98	0.442534	0.0624
pep:novel chromosome:ASM18318v1:Chromosome:256001:256243:1 gene:MHP168_222 transcript:ADQ90434 description: Putative uncharacterized protein	ADQ90434	9 kDa	1	1	1	0.1	0.32	0.16		9.93	0	0.118	9.75	0	0.118	9.59	0	0.118	9.72	0	0.12	9.99	0	0.12	10.05	0	0.12
pep:novel chromosome:ASM18318v1:Chromosome:263716:263904:1 gene:MHP168_229 transcript:ADQ90441 description: Predicted protein	ADQ90441	7 kDa	1	1	1	0.18	0.32	0.88		9.05	0	0.123	9.28	0	0.123	9.4	0	0.123	10.26	0	0.129	10.2	0	0.129	9.92	0	0.129
pep:novel chromosome:ASM18318v1:Chromosome:275492:276733:1 gene:MHP168_237 transcript:ADQ90448 description: Putative uncharacterized protein	ADQ90448	49 kDa	2	1	1	0.022	0.32	0.45		13.56	0.379522	0.0881	13.75	0.378242	0.0881	13.8	0.371624	0.0881	14.26	0.537899	0.134	14.3	0.4916	0.134	13.95	0.372859	0.134
pep:novel chromosome:ASM18318v1:Chromosome:315909:318155:-1 gene:MHP168_268 transcript:ADQ90478 description: Putative uncharacterized protein	ADQ90478	85 kDa	1	1	1	0.015	0.32	-0.53		9.69	0	0.141	9.46	0	0.141	9.86	0	0.141	9.08	0	0.202	8.88	0	0.202	9.45	0	0.202
pep:novel chromosome:ASM18318v1:Chromosome:339487:339924:1 gene:MHP168_290 transcript:ADQ90499 description: SsrA-binding protein	ADQ90499	17 kDa	3	1	1	0.076	0.32	-0.21		7.16	0.640661	0.0625	7.06	0.522323	0.0625	7.24	0.568063	0.0625	7.13	0.529583	0.137	6.74	0.522823	0.137	6.94	0.527029	0.137
pep:novel chromosome:ASM18318v1:Chromosome:350268:350465:1 gene:MHP168_726 transcript:ADQ90906 description: 50S ribosomal protein L32	ADQ90906	8 kDa	14	2	1	0.2	0.32	-0.45		10.68	0.424405	0.0508	10.6	0.400336	0.0508	10.75	0.436957	0.0508	10.1	0.461244	0.15	10.46	0.411071	0.15	10.08	0.441237	0.15
pep:novel chromosome:ASM18318v1:Chromosome:360140:360823:-1 gene:MHP168_307 transcript:ADQ90514 description: tRNA (guanine-N(1)-)-methyltransferase	ADQ90514	26 kDa	1	1	1	0.04	0.32	-0.06		9.19	0	0.169	8.72	0	0.169	9.04	0	0.169	8.81	0	0.0755	8.95	0	0.0755	9.03	0	0.0755
pep:novel chromosome:ASM18318v1:Chromosome:451832:453172:-1 gene:MHP168_376 transcript:ADQ90580 description: Putative uncharacterized protein	ADQ90580	52 kDa	1	1	1	0.029	0.32	0.13		9.33	0	0.142	9.18	0	0.142	9.58	0	0.142	9.89	0	0.238	9.27	0	0.238	9.35	0	0.238
pep:novel chromosome:ASM18318v1:Chromosome:455453:457051:1 gene:MHP168_378 transcript:ADQ90582 description: P60-like lipoprotein	ADQ90582	61 kDa	104	1	1	0.66	0.32	1.72		5.66	0	0.401	4.58	0	0.401	4.87	0	0.401	7.03	0	0.389	6.08	0	0.389	7	0	0.389
pep:novel chromosome:ASM18318v1:Chromosome:457083:457415:1 gene:MHP168_379 transcript:ADQ90583 description: HIT-like protein	ADQ90583	13 kDa	26	1	1	0.7	0.32	3.48		7.92	0.689356	0.241	7.42	0.862739	0.241	7.26	0.985589	0.241	11.16	0.504203	0.0607	10.99	0.513403	0.0607	11.02	0.925197	0.0607
pep:novel chromosome:ASM18318v1:Chromosome:466718:467488:1 gene:MHP168_387 transcript:ADQ90589 description: ABC transporter ATP-binding protein	ADQ90589	29 kDa	1	1	1	0.059	0.32	0.62		6.14	0	>1000%	6.03	0	>1000%	0.66	0	>1000%	6.71	0	0.265	5.96	0	0.265	6.28	0	0.265
pep:novel chromosome:ASM18318v1:Chromosome:470995:471924:1 gene:MHP168_390 transcript:ADQ90592 description: hypothetical protein	ADQ90592	36 kDa	2	2	1	0.023	0.32	0.93		8.79	0.427453	0.0452	8.74	0.474868	0.0452	8.66	0.7585	0.0452	9.61	0.417605	0.0649	9.78	0.406695	0.0649	9.63	0.454408	0.0649
pep:novel chromosome:ASM18318v1:Chromosome:477552:479729:1 gene:MHP168_394 transcript:ADQ90596 description: ABC transporter permease protein	ADQ90596	85 kDa	34	1	1	0.27	0.32	2.33		9.07	0	0.193	8.89	0	0.193	8.53	0	0.193	11.2	0	0.25	10.78	0	0.25	11.49	0	0.25
pep:novel chromosome:ASM18318v1:Chromosome:491918:492901:-1 gene:MHP168_405 transcript:ADQ90607 description: Cell division protein ftsZ	ADQ90607	37 kDa	3	1	1	0.037	0.32	-1.63		9.87	0.49456	0.0729	9.71	0.40572	0.0729	9.91	0.490495	0.0729	8.17	0.417002	0.0874	8.07	0.498536	0.0874	8.32	0.413813	0.0874
pep:novel chromosome:ASM18318v1:Chromosome:642616:648237:-1 gene:MHP168_503 transcript:ADQ90699 description: P216 surface protein	ADQ90699	215 kDa	1226	2	1	0.56	0.32	5.24		1.93	2.42837	0.671	0.43	1.54105	0.671	0.39	1.54105	0.671	6.78	2.05373	0.651	5.06	2.76879	0.651	5.97	1.45067	0.651
pep:novel chromosome:ASM18318v1:Chromosome:648364:652605:-1 gene:MHP168_504 transcript:ADQ90700 description: P110 membrane protein	ADQ90700	159 kDa	1180	4	1	0.57	0.32	4.32		5.3	4.3781	0.101	5.04	2.68002	0.101	5.05	2.69042	0.101	9.41	1.46222	0.0318	9.49	1.62207	0.0318	9.4	1.59068	0.0318
pep:novel chromosome:ASM18318v1:Chromosome:682181:682708:-1 gene:MHP168_528 transcript:ADQ90724 description: hypothetical protein	ADQ90724	21 kDa	1	1	1	0.063	0.32	0.37		8.56	0	0.164	8.27	0	0.164	8.74	0	0.164	9.26	0	0.404	8.2	0	0.404	9.04	0	0.404
pep:novel chromosome:ASM18318v1:Chromosome:704515:704976:-1 gene:MHP168_540 transcript:ADQ90736 description: Putative uncharacterized protein	ADQ90736	18 kDa	6	2	1	0.052	0.32	0.67		8.42	0.450426	0.0653	8.37	0.469828	0.0653	8.24	0.454696	0.0653	9.13	0.45736	0.117	8.82	0.473172	0.117	9.1	0.551253	0.117
pep:novel chromosome:ASM18318v1:Chromosome:732205:733680:-1 gene:MHP168_561 transcript:ADQ90757 description: Pts system, mannitol-specific IIbc component	ADQ90757	54 kDa	2	1	1	0.02	0.32	0.65		6.19	0.558052	0.196	5.83	0.547738	0.196	6.38	0.548671	0.196	6.81	0.571005	0.0459	6.72	0.549082	0.0459	6.85	0.591207	0.0459
pep:novel chromosome:ASM18318v1:Chromosome:748159:749313:1 gene:MHP168_580 transcript:ADQ90773 description: N-acetylglucosamine-6-phosphate deacetylase	ADQ90773	44 kDa	1	1	1	0.029	0.32	1.51		6.4	0	0.333	5.58	0	0.333	6.38	0	0.333	7.84	0	0.205	7.8	0	0.205	7.31	0	0.205
pep:novel chromosome:ASM18318v1:Chromosome:772288:772644:1 gene:MHP168_599 transcript:ADQ90792 description: PTS system glucose-specific enzyme IIB component	ADQ90792	13 kDa	1	1	1	0.076	0.32	0.07		10.61	0	0.108	10.35	0	0.108	10.62	0	0.108	10.63	0	0.0757	10.48	0	0.0757	10.69	0	0.0757
pep:novel chromosome:ASM18318v1:Chromosome:836633:837382:1 gene:MHP168_641 transcript:ADQ90830 description: segregation and condensation protein A	ADQ90830	29 kDa	1	1	1	0.036	0.32	-0.45		7.98	0	0.127	7.85	0	0.127	7.62	0	0.127	7.21	0	0.424	6.96	0	0.424	8.08	0	0.424
pep:novel chromosome:ASM18318v1:Chromosome:837966:840803:1 gene:MHP168_643 transcript:ADQ90832 description: hypothetical protein	ADQ90832	112 kDa	1	1	1	0.012	0.32	-0.62		8.79	0	0.433	9.51	0	0.433	8.32	0	0.433	7.2	0	1.18	8.21	0	1.18	9.86	0	1.18
pep:novel chromosome:ASM18318v1:Chromosome:843149:843289:-1 gene:MHP168_744 transcript:ADQ90921 description: 50S ribosomal protein L33	ADQ90921	6 kDa	3	1	1	0.2	0.32	-0.44		11.69	0.406255	0.0296	11.66	0.399882	0.0296	11.75	0.420435	0.0296	11.38	0.395115	0.0984	11.32	0.495211	0.0984	11.11	0.377283	0.0984
pep:novel chromosome:ASM18318v1:Chromosome:856125:856988:1 gene:MHP168_659 transcript:ADQ90847 description: Putative uncharacterized protein	ADQ90847	34 kDa	2	2	1	0.035	0.32	0.04		8.05	0.510609	0.212	7.5	0.771517	0.212	7.99	0.72299	0.212	7.86	0.45775	0.135	7.79	0.451052	0.135	8.15	0.484614	0.135
pep:novel chromosome:ASM18318v1:Chromosome:862951:863886:1 gene:MHP168_668 transcript:ADQ90855 description: Prolipoprotein p65	ADQ90855	35 kDa	184	4	1	0.68	0.32	2.62		8.22	0.908778	0.173	8.13	0.835035	0.173	7.75	1.4127	0.173	10.64	0.797657	0.268	11.12	0.742394	0.268	10.37	0.668386	0.268
pep:novel chromosome:ASM40085v1:Chromosome:96245:97621:1 gene:MHP168L_085 transcript:AGM21864 description: NADH oxidase	AGM21864	51 kDa	163	40	17	0.41	0.32	-2.46		11.69	1.12025	0.0808	11.55	1.07356	0.0808	11.79	0.98906	0.0808	8.9	1.0476	0.224	9.23	1.24221	0.224	9.54	1.19462	0.224
pep:novel chromosome:ASM40085v1:Chromosome:97814:99097:-1 gene:MHP168L_086 transcript:AGM21865 description: Thymidine phosphorylase	AGM21865	47 kDa	83	1	1	0.48	0.32	-2.71		9.76	0.530076	0.035	9.79	0.591651	0.035	9.85	0.565465	0.035	7.09	0.506448	0.26	6.69	1.13312	0.26	7.43	0.999661	0.26
pep:novel chromosome:ASM40085v1:Chromosome:105829:107313:-1 gene:MHP168L_747 transcript:AGM21870 description: hypothetical protein	AGM21870	59 kDa	32	1	1	0.27	0.32	-0.44		9.1	0	0.215	8.52	0	0.215	8.63	0	0.215	8.15	0	0.28	8.03	0	0.28	8.77	0	0.28
pep:novel chromosome:ASM40085v1:Chromosome:150194:150637:1 gene:MHP168L_127 transcript:AGM21909 description: 50S ribosomal protein L15	AGM21909	17 kDa	31	14	8	0.48	0.32	-5.43		12.74	0	0.112	12.88	0	0.112	13.06	0	0.112	7.2	0	0.369	7.28	0	0.369	8.13	0	0.369
pep:novel chromosome:ASM40085v1:Chromosome:185752:186699:-1 gene:MHP168L_167 transcript:AGM21949 description: L-lactate dehydrogenase	AGM21949	34 kDa	323	53	23	0.7	0.32	0.69		9.77	1.68662	0.0178	9.72	1.68159	0.0178	9.76	1.99517	0.0178	10.47	1.72974	0.0559	10.34	1.5716	0.0559	10.49	1.98016	0.0559
pep:novel chromosome:ASM40085v1:Chromosome:381625:381993:-1 gene:MHP168L_749 transcript:AGM22099 description: Putative type III restriction-modification system: methylase	AGM22099	14 kDa	7	1	1	0.13	0.32	-1.74		10.41	0.987908	0.0875	10.64	0.957252	0.0875	10.62	1.05925	0.0875	8.69	1.23557	0.0856	8.82	0.932974	0.0856	8.93	0.983183	0.0856
pep:novel chromosome:ASM40085v1:Chromosome:456471:458069:1 gene:MHP168L_378 transcript:AGM22156 description: P60-like lipoprotein	AGM22156	61 kDa	104	47	32	0.66	0.32	-2.08		7.82	0	0.106	7.51	0	0.106	7.69	0	0.106	5.46	0	0.122	5.55	0	0.122	5.8	0	0.122
pep:novel chromosome:ASM40085v1:Chromosome:458101:458433:1 gene:MHP168L_379 transcript:AGM22157 description: HIT-like protein	AGM22157	13 kDa	26	14	8	0.7	0.32	-0.88		7.92	0.728186	0.0908	7.83	1.40382	0.0908	7.66	0.482042	0.0908	6.99	0.496658	0.134	6.63	0.948466	0.134	6.93	0.583483	0.134
pep:novel chromosome:ASM40085v1:Chromosome:478573:480750:1 gene:MHP168L_394 transcript:AGM22171 description: ABC transporter permease protein	AGM22171	85 kDa	35	25	18	0.27	0.32	-1.57		9.78	0.443829	0.0786	9.65	0.452861	0.0786	9.56	0.444289	0.0786	8.03	0.512369	0.0714	8.04	0.433655	0.0714	8.22	0.488821	0.0714
pep:novel chromosome:ASM40085v1:Chromosome:643919:649528:-1 gene:MHP168L_503 transcript:AGM22277 description: P216 surface protein	AGM22277	215 kDa	1233	210	88	0.56	0.32	-8.24		9.03	0.875927	0.052	9.02	1.00441	0.052	9.16	0.835239	0.052	0.81	0.9265	0.0372	0.8	0.9265	0.0372	0.9	0.9265	0.0372
pep:novel chromosome:ASM40085v1:Chromosome:649655:653896:-1 gene:MHP168L_504 transcript:AGM22278 description: P110 membrane protein	AGM22278	159 kDa	1191	186	77	0.57	0.32	-4.71		9.81	0.906737	0.0675	10	1.02736	0.0675	9.94	0.937084	0.0675	2.19	4.98693	2.11	4.68	4.04234	2.11	5.86	0.911057	2.11
pep:novel chromosome:ASM40085v1:Chromosome:862335:863270:1 gene:MHP168L_668 transcript:AGM22433 description: Prolipoprotein p65	AGM22433	35 kDa	178	40	20	0.68	0.32	-2.82		12.15	0.652903	0.175	12.15	0.637836	0.175	12.59	0.630802	0.175	9.35	0.67571	0.075	9.53	0.473758	0.075	9.54	0.728075	0.075
pep:novel chromosome:ASM18318v1:Chromosome:122034:122951:1 gene:MHP168_102 transcript:ADQ90322 description: Thioredoxin reductase	ADQ90322	34 kDa	57	21	10	0.45	0.33	0.05		10	0.462117	0.0588	9.84	0.475869	0.0588	9.94	0.449094	0.0588	10	0.465003	0.022	9.93	0.449743	0.022	9.98	0.494213	0.022
pep:novel chromosome:ASM18318v1:Chromosome:331035:331853:1 gene:MHP168_284 transcript:ADQ90493 description: Cobalt import ATP-binding protein cbiO 1	ADQ90493	30 kDa	39	13	8	0.32	0.34	0.04		9.35	0.42904	0.0345	9.26	0.471179	0.0345	9.34	0.436526	0.0345	9.46	0.484399	0.0643	9.27	0.469201	0.0643	9.38	0.448535	0.0643
pep:novel chromosome:ASM18318v1:Chromosome:180716:181432:-1 gene:MHP168_163 transcript:ADQ90379 description: Protoporphyrinogen oxidase-like protein	ADQ90379	28 kDa	11	5	5	0.24	0.35	0.11		7.97	0.460243	0.078	8	0.473315	0.078	7.79	0.576756	0.078	8.11	0.508943	0.0436	7.99	0.49886	0.0436	8.03	0.499585	0.0436
pep:novel chromosome:ASM18318v1:Chromosome:553548:555758:-1 gene:MHP168_451 transcript:ADQ90653 description: hypothetical protein	ADQ90653	83 kDa	14	7	5	0.08	0.35	-0.32		10.89	0.467572	0.119	11.08	0.504834	0.119	11.23	0.486593	0.119	10.63	0.535709	0.0671	10.83	0.477533	0.0671	10.74	0.552977	0.0671
pep:novel chromosome:ASM18318v1:Chromosome:814214:816712:1 gene:MHP168_628 transcript:ADQ90818 description: Putative uncharacterized protein	ADQ90818	95 kDa	8	5	4	0.055	0.39	-0.11		12.15	0.4	0.0796	12.27	0.456905	0.0796	12.04	0.512975	0.0796	11.95	0.434947	0.0901	12.19	0.439121	0.0901	11.99	0.52651	0.0901
pep:novel chromosome:ASM18318v1:Chromosome:189889:190713:1 gene:MHP168_170 transcript:ADQ90385 description: lipase-esterase	ADQ90385	32 kDa	29	12	8	0.33	0.4	0.05		10.51	0.424986	0.0611	10.39	0.470436	0.0611	10.57	0.447729	0.0611	10.52	0.454651	0.0172	10.55	0.468146	0.0172	10.57	0.484718	0.0172
pep:novel chromosome:ASM18318v1:Chromosome:438687:440606:-1 gene:MHP168_365 transcript:ADQ90569 description: hypothetical protein	ADQ90569	76 kDa	37	17	14	0.2	0.4	0.04		10.01	0.427543	0.0264	9.98	0.416413	0.0264	9.94	0.457071	0.0264	10.07	0.433452	0.0367	9.99	0.479915	0.0367	9.98	0.429541	0.0367
pep:novel chromosome:ASM18318v1:Chromosome:641352:642284:1 gene:MHP168_502 transcript:ADQ90698 description: Mannnose-6 phosphate isomerase	ADQ90698	36 kDa	36	16	9	0.39	0.4	-0.08		9.52	0.481543	0.0236	9.47	0.480512	0.0236	9.53	0.485784	0.0236	9.42	0.587377	0.0151	9.41	0.464572	0.0151	9.45	0.527028	0.0151
pep:novel chromosome:ASM18318v1:Chromosome:842320:842892:-1 gene:MHP168_645 transcript:ADQ90834 description: Transcription antitermination protein	ADQ90834	23 kDa	35	15	10	0.55	0.41	0.04		10.26	0.437318	0.0359	10.16	0.43634	0.0359	10.25	0.426668	0.0359	10.3	0.529277	0.0251	10.23	0.431696	0.0251	10.28	0.459366	0.0251
pep:novel chromosome:ASM18318v1:Chromosome:144179:144304:1 gene:MHP168_115 transcript:ADQ90333 description: 30S ribosomal protein S19	ADQ90333	5 kDa	146	8	2	0.56	0.44	0.03		9.82	0.427185	0.114	9.56	0.469978	0.114	9.86	0.438033	0.114	9.72	0.460713	0.0529	9.87	0.444319	0.0529	9.76	0.445993	0.0529
pep:novel chromosome:ASM18318v1:Chromosome:202785:203789:-1 gene:MHP168_185 transcript:ADQ90400 description: Pyruvate dehydrogenase E1 component beta subunit	ADQ90400	37 kDa	335	44	17	0.64	0.44	0.05		10.26	0.458904	0.0128	10.24	0.509645	0.0128	10.23	0.523002	0.0128	10.29	0.644497	0.0117	10.32	0.565828	0.0117	10.29	0.474791	0.0117
pep:novel chromosome:ASM18318v1:Chromosome:220855:221454:1 gene:MHP168_197 transcript:ADQ90411 description: Putative uncharacterized protein	ADQ90411	24 kDa	2	2	2	0.07	0.44	-0.25		12.67	0.380753	0.0579	12.75	0.405152	0.0579	12.58	0.460425	0.0579	12.22	0.481526	0.126	12.42	0.432635	0.126	12.58	0.386451	0.126
pep:novel chromosome:ASM18318v1:Chromosome:324653:324988:-1 gene:MHP168_276 transcript:ADQ90485 description: Putative uncharacterized protein	ADQ90485	14 kDa	5	2	2	0.15	0.44	0.4		8.38	0.458685	0.0428	8.27	0.526625	0.0428	8.27	0.607654	0.0428	8.84	0.594221	0.114	8.53	0.527945	0.114	8.78	0.492561	0.114
pep:novel chromosome:ASM18318v1:Chromosome:327345:327626:1 gene:MHP168_278 transcript:ADQ90487 description: hypothetical protein	ADQ90487	11 kDa	6	2	2	0.17	0.44	-0.58		11.46	0.639243	0.338	12.02	1.22565	0.338	11.07	0.635273	0.338	10.79	0.928774	0.0274	10.74	0.466436	0.0274	10.81	0.449777	0.0274
pep:novel chromosome:ASM18318v1:Chromosome:421692:423113:-1 gene:MHP168_352 transcript:ADQ90556 description: Putative uncharacterized protein	ADQ90556	55 kDa	3	3	2	0.047	0.44	0.11		8.78	0.452485	0.083	8.88	0.460761	0.083	8.64	0.623208	0.083	8.92	0.495695	0.0343	8.92	0.467127	0.0343	8.84	0.476003	0.0343
pep:novel chromosome:ASM18318v1:Chromosome:486074:486559:1 gene:MHP168_399 transcript:ADQ90601 description: Putative uncharacterized protein	ADQ90601	19 kDa	2	2	2	0.11	0.44	-0.06		7.85	0.469208	0.0623	7.69	0.46338	0.0623	7.7	0.465748	0.0623	8	0.474861	0.194	7.47	0.478621	0.194	7.6	0.563902	0.194
pep:novel chromosome:ASM18318v1:Chromosome:528942:529718:1 gene:MHP168_429 transcript:ADQ90631 description: Putative uncharacterized protein	ADQ90631	31 kDa	3	2	2	0.11	0.44	0.43		9.74	0.433645	0.04	9.63	0.49442	0.04	9.72	0.482465	0.04	10.15	0.459183	0.269	9.61	0.897734	0.269	10.34	0.428576	0.269
pep:novel chromosome:ASM18318v1:Chromosome:544288:545514:-1 gene:MHP168_443 transcript:ADQ90645 description: Putative uncharacterized protein	ADQ90645	47 kDa	6	3	2	0.059	0.44	0.05		9.4	0.42806	0.0915	9.58	0.461843	0.0915	9.66	0.446355	0.0915	9.6	0.440115	0.0499	9.54	0.425018	0.0499	9.68	0.580779	0.0499
pep:novel chromosome:ASM18318v1:Chromosome:598049:598963:1 gene:MHP168_467 transcript:ADQ90665 description: ribosomal large subunit pseudouridine synthase D	ADQ90665	35 kDa	3	2	2	0.062	0.44	-0.06		8.33	0.473652	0.0954	8.35	0.421557	0.0954	8.58	0.466914	0.0954	8.28	0.469508	0.203	8.15	0.448522	0.203	8.7	0.467626	0.203
pep:novel chromosome:ASM18318v1:Chromosome:867145:867297:1 gene:MHP168_745 transcript:ADQ90922 description: 50S ribosomal protein L33	ADQ90922	6 kDa	36	6	2	0.3	0.44	-0.43		11.51	0.556182	0.182	11.21	0.730895	0.182	11.73	0.645669	0.182	10.91	0.716574	0.178	11.01	0.48908	0.178	11.39	0.86397	0.178
pep:novel chromosome:ASM18318v1:Chromosome:550988:551710:-1 gene:MHP168_448 transcript:ADQ90650 description: Sugar isomerase SgaE	ADQ90650	27 kDa	55	21	11	0.44	0.45	-0.01		10.91	0.431636	0.0635	10.74	0.482848	0.0635	10.86	0.4787	0.0635	10.85	0.512134	0.0409	10.89	0.449853	0.0409	10.77	0.469669	0.0409
pep:novel chromosome:ASM18318v1:Chromosome:17595:19880:-1 gene:MHP168_017 transcript:ADQ90244 description: ABC transporter ATP-binding protein	ADQ90244	88 kDa	16	9	8	0.12	0.46	0.02		10.13	0.55382	0.0853	10.02	0.445821	0.0853	9.88	0.702549	0.0853	10.07	0.449222	0.0416	9.99	0.436796	0.0416	10.11	0.527075	0.0416
pep:novel chromosome:ASM18318v1:Chromosome:169405:169893:1 gene:MHP168_149 transcript:ADQ90366 description: DNA methylase	ADQ90366	19 kDa	8	6	5	0.35	0.46	-0.06		8.69	0.510532	0.0717	8.56	0.466856	0.0717	8.49	0.437795	0.0717	8.53	0.432754	0.109	8.37	0.46277	0.109	8.69	0.523149	0.109
pep:novel chromosome:ASM18318v1:Chromosome:619963:620583:-1 gene:MHP168_487 transcript:ADQ90683 description: Putative uncharacterized protein	ADQ90683	23 kDa	13	8	5	0.29	0.46	-0.22		9.96	0.450971	0.042	9.88	0.489149	0.042	9.85	0.544776	0.042	9.62	0.526036	0.0501	9.65	0.459675	0.0501	9.76	0.509224	0.0501
pep:novel chromosome:ASM18318v1:Chromosome:785393:787180:1 gene:MHP168_609 transcript:ADQ90800 description: hypothetical protein	ADQ90800	72 kDa	7	3	3	0.092	0.51	-0.06		8.63	0.433771	0.0266	8.55	0.429129	0.0266	8.58	0.4395	0.0266	8.24	0.672942	0.176	8.69	0.748615	0.176	8.65	0.458998	0.176
pep:novel chromosome:ASM18318v1:Chromosome:280245:280697:-1 gene:MHP168_241 transcript:ADQ90452 description: Ribonucleotide reductase	ADQ90452	17 kDa	33	9	6	0.51	0.52	0		7.6	0.508893	0.053	7.45	0.60855	0.053	7.54	0.563205	0.053	7.37	0.739211	0.102	7.67	0.541007	0.102	7.5	0.506972	0.102
pep:novel chromosome:ASM18318v1:Chromosome:426737:427369:-1 gene:MHP168_356 transcript:ADQ90560 description: Lipoprotein	ADQ90560	24 kDa	14	8	6	0.31	0.52	-0.06		9.7	0.430824	0.0174	9.67	0.53803	0.0174	9.65	0.533151	0.0174	9.68	0.486445	0.0356	9.58	0.489439	0.0356	9.63	0.452275	0.0356
pep:novel chromosome:ASM18318v1:Chromosome:120911:121897:1 gene:MHP168_101 transcript:ADQ90321 description: Prolipoprotein diacylglyceryl transferase	ADQ90321	39 kDa	8	4	4	0.13	0.56	-0.16		10.52	0.446464	0.0955	10.61	0.526022	0.0955	10.34	0.531709	0.0955	10.44	0.574294	0.0726	10.23	0.477779	0.0726	10.35	0.508237	0.0726
pep:novel chromosome:ASM18318v1:Chromosome:329708:330442:1 gene:MHP168_282 transcript:ADQ90491 description: Putative uncharacterized protein	ADQ90491	28 kDa	6	4	4	0.16	0.56	0.03		9.53	0.468143	0.0281	9.61	0.51171	0.0281	9.56	0.451313	0.0281	9.65	0.50151	0.168	9.3	0.522364	0.168	9.76	0.453565	0.168
pep:novel chromosome:ASM18318v1:Chromosome:726239:730360:-1 gene:MHP168_559 transcript:ADQ90755 description: hypothetical protein	ADQ90755	160 kDa	4	4	4	0.03	0.56	0.18		8.68	0.54031	0.0599	8.83	0.573038	0.0599	8.82	0.489969	0.0599	9.11	0.452586	0.0906	8.87	0.45033	0.0906	8.9	0.495877	0.0906
pep:novel chromosome:ASM18318v1:Chromosome:757098:757982:-1 gene:MHP168_590 transcript:ADQ90783 description: 5'-3' exonuclease	ADQ90783	34 kDa	5	5	4	0.14	0.56	0.04		9.59	0.429214	0.031	9.68	0.469722	0.031	9.62	0.413024	0.031	9.8	0.454059	0.108	9.5	0.511112	0.108	9.71	0.509051	0.108
pep:novel chromosome:ASM18318v1:Chromosome:146391:146678:1 gene:MHP168_119 transcript:ADQ90337 description: 30S ribosomal protein S17	ADQ90337	11 kDa	55	14	7	0.47	0.57	-0.06		11.45	0.462442	0.107	11.67	0.446158	0.107	11.75	0.476303	0.107	11.36	0.515162	0.144	11.77	0.524268	0.144	11.54	0.449432	0.144
pep:novel chromosome:ASM18318v1:Chromosome:140903:141223:1 gene:MHP168_715 transcript:ADQ90896 description: 30S ribosomal protein S10	ADQ90896	12 kDa	18	6	5	0.35	0.6	-0.06		11.03	0.395259	0.0867	11.01	0.405847	0.0867	11.24	0.469027	0.0867	10.79	0.566214	0.156	11.09	0.461158	0.156	11.23	0.562776	0.156
pep:novel chromosome:ASM18318v1:Chromosome:359715:360080:-1 gene:MHP168_306 transcript:ADQ90513 description: 50S ribosomal protein L19	ADQ90513	14 kDa	27	9	5	0.45	0.6	-0.02		10.24	0.420062	0.0421	10.12	0.451193	0.0421	10.15	0.436775	0.0421	10.22	0.467296	0.108	9.97	0.486944	0.108	10.26	0.449371	0.108
pep:novel chromosome:ASM18318v1:Chromosome:621435:622808:-1 gene:MHP168_488 transcript:ADQ90684 description: ATP synthase beta chain	ADQ90684	51 kDa	13	6	5	0.16	0.6	0		9.4	0.442673	0.0466	9.48	0.490806	0.0466	9.53	0.46881	0.0466	9.33	0.520403	0.0791	9.54	0.441995	0.0791	9.51	0.457366	0.0791
pep:novel chromosome:ASM18318v1:Chromosome:837372:837959:1 gene:MHP168_642 transcript:ADQ90831 description: segregation and condensation protein B	ADQ90831	22 kDa	10	5	5	0.37	0.6	-0.05		9.73	0.419003	0.0661	9.55	0.426629	0.0661	9.57	0.467158	0.0661	9.59	0.44959	0.0198	9.59	0.471086	0.0198	9.54	0.478928	0.0198
pep:novel chromosome:ASM18318v1:Chromosome:490677:491690:-1 gene:MHP168_404 transcript:ADQ90606 description: Putative uncharacterized protein	ADQ90606	38 kDa	42	15	11	0.32	0.62	-0.05		9.93	0.459699	0.029	9.96	0.469979	0.029	10.02	0.454441	0.029	9.96	0.489593	0.0385	9.86	0.469225	0.0385	9.95	0.475801	0.0385
pep:novel chromosome:ASM18318v1:Chromosome:6084:7055:1 gene:MHP168_006 transcript:ADQ90234 description: DHH family phosphoesterase	ADQ90234	37 kDa	22	11	8	0.29	0.67	0.02		9.36	0.43468	0.0259	9.29	0.453478	0.0259	9.31	0.427788	0.0259	9.38	0.510709	0.0574	9.26	0.427217	0.0574	9.42	0.514677	0.0574
pep:novel chromosome:ASM18318v1:Chromosome:429041:429562:1 gene:MHP168_358 transcript:ADQ90562 description: Putative uncharacterized protein	ADQ90562	20 kDa	28	11	8	0.59	0.67	0.01		8.98	0.469297	0.0383	8.99	0.48046	0.0383	8.89	0.447295	0.0383	8.73	0.98088	0.176	8.79	0.563957	0.176	9.19	0.463737	0.176
pep:novel chromosome:ASM18318v1:Chromosome:59741:60592:1 gene:MHP168_055 transcript:ADQ90278 description: 30S ribosomal protein S2	ADQ90278	32 kDa	75	25	13	0.46	0.7	0		10.1	0.463603	0.0158	10.09	0.481187	0.0158	10.13	0.453473	0.0158	10.11	0.488987	0.0271	10.13	0.470762	0.0271	10.06	0.44506	0.0271
pep:novel chromosome:ASM18318v1:Chromosome:8987:11008:1 gene:MHP168_010 transcript:ADQ90237 description: Putative uncharacterized protein	ADQ90237	78 kDa	267	40	25	0.37	0.73	-0.03		9.92	0.474453	0.0199	9.87	0.538523	0.0199	9.86	0.516249	0.0199	9.87	0.533787	0.0346	9.8	0.502631	0.0346	9.9	0.582202	0.0346
pep:novel chromosome:ASM18318v1:Chromosome:114189:116645:-1 gene:MHP168_097 transcript:ADQ90317 description: Putative serine protease, subtilase family active site	ADQ90317	95 kDa	116	37	28	0.33	0.73	-0.01		10.25	0.720911	0.142	9.88	0.516284	0.142	10.21	0.632225	0.142	9.97	0.604176	0.0898	10.09	0.486618	0.0898	10.23	0.59354	0.0898
pep:novel chromosome:ASM18318v1:Chromosome:465469:466734:1 gene:MHP168_386 transcript:ADQ90588 description: P37-like ABC transporter substrate-binding lipoprotein	ADQ90588	48 kDa	39	19	13	0.33	0.74	0		9.61	0.42656	0.0404	9.65	0.469015	0.0404	9.72	0.440958	0.0404	9.79	0.534217	0.0861	9.65	0.472085	0.0861	9.55	0.486122	0.0861
pep:novel chromosome:ASM18318v1:Chromosome:26654:26947:1 gene:MHP168_024 transcript:ADQ90249 description: Asp-tRNAAsn/Glu-tRNAGln amidotransferase C subunit	ADQ90249	11 kDa	28	8	6	0.71	0.75	0.04		10.47	0.439427	0.0332	10.39	0.468769	0.0332	10.47	0.572273	0.0332	10.61	0.582853	0.185	10.66	0.50287	0.185	10.18	0.474101	0.185
pep:novel chromosome:ASM18318v1:Chromosome:413347:413610:1 gene:MHP168_343 transcript:ADQ90549 description: 30S ribosomal protein S18	ADQ90549	10 kDa	13	9	6	0.46	0.75	-0.01		10.87	0.432158	0.0767	10.74	0.515475	0.0767	10.96	0.510926	0.0767	10.77	0.562227	0.0606	10.81	0.665596	0.0606	10.94	0.518028	0.0606
pep:novel chromosome:ASM18318v1:Chromosome:749368:750198:-1 gene:MHP168_581 transcript:ADQ90774 description: Fructose-bisphosphate aldolase	ADQ90774	31 kDa	6	6	5	0.25	0.75	0.05		8.63	0.554927	0.0832	8.65	0.490707	0.0832	8.43	0.528777	0.0832	8.63	0.511847	0.0355	8.58	0.48592	0.0355	8.68	0.518015	0.0355
pep:novel chromosome:ASM18318v1:Chromosome:86792:88588:1 gene:MHP168_076 transcript:ADQ90298 description: GTP-binding protein lepA	ADQ90298	67 kDa	26	15	12	0.21	0.77	-0.01		9.32	0.443694	0.0218	9.26	0.512175	0.0218	9.28	0.473862	0.0218	9.21	0.516797	0.0587	9.28	0.512497	0.0587	9.38	0.494897	0.0587
pep:novel chromosome:ASM18318v1:Chromosome:149356:149472:1 gene:MHP168_125 transcript:ADQ90342 description: 50S ribosomal protein L18	ADQ90342	4 kDa	39	6	4	0.74	0.77	0		9.76	0.460507	0.0687	9.89	0.47672	0.0687	9.96	0.498516	0.0687	9.66	0.515698	0.119	9.94	0.443275	0.119	9.97	0.494871	0.119
pep:novel chromosome:ASM18318v1:Chromosome:172529:173926:-1 gene:MHP168_154 transcript:ADQ90370 description: trigger factor	ADQ90370	54 kDa	301	59	26	0.59	0.77	-0.03		10.72	0.440238	0.0359	10.64	0.492323	0.0359	10.62	0.486661	0.0359	10.7	0.53285	0.0419	10.63	0.504359	0.0419	10.58	0.471594	0.0419
pep:novel chromosome:ASM18318v1:Chromosome:229004:229558:1 gene:MHP168_203 transcript:ADQ90416 description: Peptidyl-tRNA hydrolase	ADQ90416	21 kDa	10	5	4	0.23	0.77	-0.02		10.39	0.78281	0.0533	10.54	0.583454	0.0533	10.51	0.469059	0.0533	10.5	0.476501	0.0742	10.37	0.447411	0.0742	10.58	0.855112	0.0742
pep:novel chromosome:ASM18318v1:Chromosome:266318:268147:1 gene:MHP168_233 transcript:ADQ90444 description: Putative uncharacterized protein	ADQ90444	70 kDa	5	4	4	0.061	0.77	0.01		9.2	0.438521	0.208	8.63	0.450045	0.208	9.06	0.466414	0.208	9.05	0.451636	0.0925	9.06	0.479362	0.0925	8.82	0.429397	0.0925
pep:novel chromosome:ASM18318v1:Chromosome:766679:767758:1 gene:MHP168_595 transcript:ADQ90788 description: Pullulanase	ADQ90788	41 kDa	20	12	10	0.31	0.82	-0.02		9.79	0.426427	0.0316	9.71	0.442788	0.0316	9.72	0.500598	0.0316	9.83	0.479111	0.103	9.56	0.466423	0.103	9.8	0.461928	0.103
pep:novel chromosome:ASM18318v1:Chromosome:178845:179261:-1 gene:MHP168_161 transcript:ADQ90377 description: hypothetical protein	ADQ90377	16 kDa	18	5	3	0.31	0.83	0.02		9.36	0.547153	0.0753	9.28	0.478114	0.0753	9.14	0.46402	0.0753	9.29	0.55624	0.0415	9.32	0.503259	0.0415	9.21	0.493801	0.0415
pep:novel chromosome:ASM18318v1:Chromosome:190971:191225:-1 gene:MHP168_171 transcript:ADQ90386 description: 50S ribosomal protein L27	ADQ90386	9 kDa	34	8	3	0.5	0.83	0.04		9.83	0.46181	0.0537	9.74	0.4883	0.0537	9.9	0.638943	0.0537	9.8	0.568463	0.0355	9.88	0.487622	0.0355	9.89	0.5208	0.0355
pep:novel chromosome:ASM18318v1:Chromosome:360845:361111:-1 gene:MHP168_727 transcript:ADQ90907 description: 30S ribosomal protein S16	ADQ90907	10 kDa	16	5	3	0.38	0.83	0.04		10.54	0.418786	0.0589	10.37	0.573767	0.0589	10.44	0.405449	0.0589	10.39	0.514461	0.0595	10.55	0.455544	0.0595	10.53	0.568856	0.0595
pep:novel chromosome:ASM18318v1:Chromosome:654159:655787:-1 gene:MHP168_506 transcript:ADQ90702 description: Putative uncharacterized protein	ADQ90702	64 kDa	14	11	9	0.17	0.83	0.02		9.28	0.442632	0.0275	9.34	0.470333	0.0275	9.26	0.527586	0.0275	9.41	0.470317	0.0584	9.24	0.493708	0.0584	9.3	0.435195	0.0584
pep:novel chromosome:ASM18318v1:Chromosome:874233:877838:-1 gene:MHP168_675 transcript:ADQ90861 description: hypothetical protein	ADQ90861	135 kDa	664	121	61	0.56	0.84	-0.01		10.6	0.446863	0.0142	10.58	0.495598	0.0142	10.62	0.504615	0.0142	10.62	0.554983	0.013	10.62	0.522138	0.013	10.58	0.477795	0.013
pep:novel chromosome:ASM18318v1:Chromosome:36273:38201:-1 gene:MHP168_031 transcript:ADQ90255 description: Topoisomerase IV subunit B	ADQ90255	73 kDa	38	19	13	0.18	0.9	-0.04		9.44	0.48878	0.0216	9.44	0.453129	0.0216	9.49	0.528757	0.0216	9.38	0.52669	0.0249	9.45	0.539606	0.0249	9.43	0.477427	0.0249
pep:novel chromosome:ASM18318v1:Chromosome:584712:585509:-1 gene:MHP168_460 transcript:ADQ90658 description: hypothetical protein	ADQ90658	30 kDa	10	5	5	0.22	0.92	0.01		8.98	0.526061	0.146	8.88	0.611922	0.146	9.28	0.474917	0.146	9.05	0.493982	0.0258	9.04	0.517878	0.0258	9.11	0.438107	0.0258
pep:novel chromosome:ASM18318v1:Chromosome:660428:661585:-1 gene:MHP168_510 transcript:ADQ90706 description: Oligopeptide transport system permease protein	ADQ90706	43 kDa	11	5	5	0.14	0.92	-0.02		10.52	0.496627	0.0366	10.55	0.425241	0.0366	10.45	0.454505	0.0366	10.61	0.439527	0.126	10.28	0.45478	0.126	10.58	0.482258	0.126
pep:novel chromosome:ASM18318v1:Chromosome:817926:819194:1 gene:MHP168_629 transcript:ADQ90819 description: lipoprotein	ADQ90819	48 kDa	83	41	22	0.55	0.94	-0.01		9.74	0.433156	0.0423	9.71	0.48658	0.0423	9.82	0.465673	0.0423	9.74	0.501327	0.0147	9.77	0.453863	0.0147	9.73	0.47041	0.0147
pep:novel chromosome:ASM18318v1:Chromosome:306636:307091:1 gene:MHP168_262 transcript:ADQ90473 description: Putative uncharacterized protein	ADQ90473	18 kDa	25	13	7	0.46	0.95	0.03		10.44	0.430362	0.0225	10.49	0.433546	0.0225	10.51	0.472933	0.0225	10.56	0.53351	0.0839	10.59	0.481784	0.0839	10.36	0.503341	0.0839
pep:novel chromosome:ASM18318v1:Chromosome:149474:150124:1 gene:MHP168_126 transcript:ADQ90343 description: 30S ribosomal protein S5	ADQ90343	24 kDa	30	15	9	0.42	0.96	0.01		10.24	0.456493	0.0815	10.1	0.513049	0.0815	10.33	0.51129	0.0815	10.13	0.541295	0.0728	10.34	0.444108	0.0728	10.2	0.4923	0.0728
pep:novel chromosome:ASM18318v1:Chromosome:8468:8818:1 gene:MHP168_009 transcript:ADQ90236 description: Cell division protein ftsY	ADQ90236	13 kDa	6	3	2	0.14	1	-0.02		10.14	0.434997	0.0317	10.09	0.397841	0.0317	10.18	0.40164	0.0317	10.28	0.539249	0.169	9.85	0.418674	0.169	10.26	0.467036	0.169
pep:novel chromosome:ASM18318v1:Chromosome:627932:628492:-1 gene:MHP168_493 transcript:ADQ90689 description: Putative uncharacterized protein	ADQ90689	21 kDa	6	4	4	0.17	1	-0.1		9.69	0.446232	0.08	9.5	0.461816	0.08	9.71	0.458773	0.08	9.49	0.46468	0.0428	9.55	0.431825	0.0428	9.61	0.470221	0.0428
