# Supplementary material for: Quantitative Proteomic Analyses of a Pathogenic Strain and Its Highly Passaged Attenuated Strain of Mycoplasma hyopneumoniae
Source: Biomed Res Int. 2019 Jul 1;2019:4165735. doi: 10.1155/2019/4165735 (PMC6634062; doi:10.1155/2019/4165735)
Supplement: Supplementary 2 — Table S2: Gene Ontology enrichment analysis for differentially expressed proteins. [file 4165735.f2.xlsx]

## Sheet: Diff GO Enrichment
Supplementary Table 2: Gene Ontology enrichment analysis for the differentially expressed proteins
GO-ID	Term	Category	FDR	-LogP	TestSeqs	RefSeqs
GO:0003824	catalytic activity	F	0.321738	2.88774	ADQ90454, ADQ90455, ADQ90532, ADQ90231, ADQ90492, ADQ90691, ADQ90637, ADQ90711, ADQ90458, ADQ90833, ADQ90459, ADQ90613, ADQ90632, ADQ90456, ADQ90852, ADQ90512, ADQ90875, ADQ90457, ADQ90611, ADQ90719, ADQ90838, ADQ90619, ADQ90480, ADQ90246, ADQ90389, ADQ90587, ADQ90760, ADQ90265, ADQ90464, ADQ90461, ADQ90264, ADQ90460, AGM21970, ADQ90727, ADQ90309, ADQ90824, ADQ90722, ADQ90524, ADQ90525, ADQ90602,…	ADQ90630, AGM21782, ADQ90510, ADQ90750, AGM21784, AGM21783, ADQ90515, ADQ90757, ADQ90876, ADQ90877, ADQ90514, ADQ90756, ADQ90874, ADQ90633, ADQ90883, ADQ90520, AGM21793, ADQ90400, AGM21792, AGM22400, AGM22401, ADQ90640, AGM22402, AGM21797, AGM21796, AGM21794, ADQ90649, ADQ90528, AGM22407, ADQ90408, ADQ90405, ADQ90526, AGM21799, ADQ90406, ADQ90527, ADQ90769, ADQ90887, AGM22403, ADQ90401, AGM22405,…
GO:0008170	N-methyltransferase activity	F	0.321738	2.4815	ADQ90637, ADQ90824, ADQ90525, ADQ90611	AGM22130, AGM22428, ADQ90556, ADQ90850, AGM22401, AGM22098, AGM22099, AGM22187
GO:0016301	kinase activity	F	0.510079	2.1301	ADQ90711, ADQ90722, ADQ90456, ADQ90587, ADQ90808, ADQ90264	AGM22272, ADQ90696, AGM22059, AGM22450, AGM22154, ADQ90294, AGM22299, ADQ90874, AGM22317, AGM22161, AGM22289, AGM22025, ADQ90367, AGM22384, AGM22385, AGM21851, AGM21972, ADQ90580, AGM21911, ADQ90405, ADQ90489, ADQ90742, ADQ90346, AGM21934, ADQ90809, AGM21818
GO:0000287	magnesium ion binding	F	0.519678	2.09718	ADQ90480, ADQ90459, ADQ90852, ADQ90265	AGM22050, ADQ90803, ADQ90392, AGM22074, ADQ90504, AGM21820, ADQ90359, AGM21959, AGM22379, AGM22028, AGM22430
GO:0048037	cofactor binding	F	0.718812	1.80255	ADQ90459, ADQ90454, ADQ90532, ADQ90231	ADQ90256, AGM22345, ADQ90771, AGM22028, AGM22331, AGM22023, AGM21783, AGM22288, AGM21810, AGM21864, ADQ90307, AGM22106, ADQ90756, ADQ90710
GO:0016740	transferase activity	F	0.718812	1.77003	ADQ90454, ADQ90587, ADQ90760, ADQ90264, ADQ90492, AGM21970, ADQ90637, ADQ90824, ADQ90711, ADQ90722, ADQ90525, ADQ90456, ADQ90852, ADQ90611, ADQ90808	AGM21782, AGM22234, ADQ90477, ADQ90510, ADQ90232, AGM22357, ADQ90230, ADQ90351, AGM22078, AGM21784, AGM22199, ADQ90592, AGM21943, ADQ90757, AGM21942, ADQ90514, ADQ90874, ADQ90357, AGM21946, AGM22085, AGM22081, ADQ90366, ADQ90367, AGM22368, AGM22401, AGM22247, ADQ90486, ADQ90405, AGM21959, ADQ90489, ADQ90402, ADQ90644, AGM22406, ADQ90809, AGM21839, AGM22290, ADQ90850, ADQ90696, AGM21880, ADQ90697,…
GO:0016836	hydro-lyase activity	F	0.718812	1.7539	ADQ90480, ADQ90460	AGM22050, AGM22029
GO:0016773	phosphotransferase activity, alcohol group as acceptor	F	0.718812	1.74917	ADQ90722, ADQ90456, ADQ90587, ADQ90760, ADQ90264	AGM22161, ADQ90392, AGM22025, ADQ90697, AGM22368, AGM22335, AGM22450, AGM22274, AGM22154, ADQ90792, AGM21972, ADQ90580, AGM22199, AGM22332, AGM22299, ADQ90405, ADQ90757, ADQ90623, AGM22348, AGM21959, ADQ90874, ADQ90775, AGM21818
GO:0046872	metal ion binding	F	0.821044	1.58361	ADQ90913, ADQ90480, ADQ90459, ADQ90852, ADQ90498, ADQ90265, ADQ90460	AGM22050, ADQ90392, AGM22271, AGM22074, AGM22372, AGM22093, ADQ90355, ADQ90796, ADQ90774, AGM22379, ADQ90695, ADQ90670, AGM22197, AGM22353, AGM22430, AGM22276, AGM21789, AGM21921, ADQ90317, AGM21820, AGM21842, ADQ90359, AGM21926, ADQ90698, ADQ90237, ADQ90282, AGM22240, AGM21793, AGM22246, AGM22347, AGM22028, ADQ90241, ADQ90780, ADQ90285, ADQ90363, AGM22068, ADQ90803, ADQ90504, AGM21875, AGM21930,…
GO:0043169	cation binding	F	0.821044	1.58361	ADQ90913, ADQ90480, ADQ90459, ADQ90852, ADQ90498, ADQ90265, ADQ90460	AGM22050, ADQ90392, AGM22271, AGM22074, AGM22372, AGM22093, ADQ90355, ADQ90796, ADQ90774, AGM22379, ADQ90695, ADQ90670, AGM22197, AGM22353, AGM22430, AGM22276, AGM21789, AGM21921, ADQ90317, AGM21820, AGM21842, ADQ90359, AGM21926, ADQ90698, ADQ90237, ADQ90282, AGM22240, AGM21793, AGM22246, AGM22347, AGM22028, ADQ90241, ADQ90780, ADQ90285, ADQ90363, AGM22068, ADQ90803, ADQ90504, AGM21875, AGM21930,…
GO:0016491	oxidoreductase activity	F	0.821044	1.429	ADQ90458, ADQ90613, ADQ90455, ADQ90532, ADQ90464, ADQ90231	AGM22093, AGM21881, AGM22311, ADQ90256, ADQ90771, ADQ90453, ADQ90451, AGM22033, AGM22253, AGM22331, AGM21783, ADQ90735, AGM21864, AGM22238, ADQ90756, AGM21969, ADQ90830, ADQ90677, ADQ90710, AGM21949, AGM22020, ADQ90663, ADQ90322, AGM22345, ADQ90320, AGM22027, AGM22022, AGM22364, ADQ90382, AGM22288, AGM22024, AGM22189, AGM22407, AGM21810, ADQ90307, AGM22106, ADQ90789, ADQ90401, AGM21879
GO:0016835	carbon-oxygen lyase activity	F	0.821044	1.38807	ADQ90480, ADQ90460	AGM22050, AGM22029, ADQ90780, AGM22353
GO:0044282	small molecule catabolic process	P	0.321738	2.81629	ADQ90459, ADQ90457, ADQ90455, ADQ90460	AGM22372, AGM22029, ADQ90796, AGM22026, AGM22028, AGM22024
GO:0019310	inositol catabolic process	P	0.321738	2.51204	ADQ90459, ADQ90457, ADQ90460	AGM22029, AGM22026, AGM22028
GO:1901616	organic hydroxy compound catabolic process	P	0.321738	2.51204	ADQ90459, ADQ90457, ADQ90460	AGM22029, AGM22026, AGM22028
GO:0044275	cellular carbohydrate catabolic process	P	0.321738	2.51204	ADQ90459, ADQ90457, ADQ90460	AGM22029, AGM22026, AGM22028
GO:0046164	alcohol catabolic process	P	0.321738	2.51204	ADQ90459, ADQ90457, ADQ90460	AGM22029, AGM22026, AGM22028
GO:0046174	polyol catabolic process	P	0.321738	2.51204	ADQ90459, ADQ90457, ADQ90460	AGM22029, AGM22026, AGM22028
GO:0044728	DNA methylation or demethylation	P	0.321738	2.4815	ADQ90637, ADQ90824, ADQ90525, ADQ90611	AGM22130, ADQ90820, ADQ90556, AGM22401, AGM22098, AGM22099, AGM22187, AGM22397
GO:0006305	DNA alkylation	P	0.321738	2.4815	ADQ90637, ADQ90824, ADQ90525, ADQ90611	AGM22130, ADQ90820, ADQ90556, AGM22401, AGM22098, AGM22099, AGM22187, AGM22397
GO:0006306	DNA methylation	P	0.321738	2.4815	ADQ90637, ADQ90824, ADQ90525, ADQ90611	AGM22130, ADQ90820, ADQ90556, AGM22401, AGM22098, AGM22099, AGM22187, AGM22397
GO:0006020	inositol metabolic process	P	0.321738	2.4815	ADQ90459, ADQ90457, ADQ90455, ADQ90460	ADQ90326, AGM22029, AGM21793, AGM22026, AGM22028, AGM21885, ADQ90241, AGM22024
GO:0019751	polyol metabolic process	P	0.447607	2.21317	ADQ90459, ADQ90457, ADQ90455, ADQ90460	ADQ90537, ADQ90326, AGM22029, AGM21793, AGM22026, AGM22028, AGM21885, ADQ90241, AGM22111, AGM22024
GO:1901615	organic hydroxy compound metabolic process	P	0.447607	2.21317	ADQ90459, ADQ90457, ADQ90455, ADQ90460	ADQ90537, ADQ90326, AGM22029, AGM21793, AGM22026, AGM22028, AGM21885, ADQ90241, AGM22111, AGM22024
GO:0006304	DNA modification	P	0.447607	2.21317	ADQ90637, ADQ90824, ADQ90525, ADQ90611	AGM22130, ADQ90820, ADQ90556, AGM22125, AGM22401, ADQ90551, AGM22098, AGM22099, AGM22187, AGM22397
GO:0006066	alcohol metabolic process	P	0.447607	2.21317	ADQ90459, ADQ90457, ADQ90455, ADQ90460	ADQ90537, ADQ90326, AGM22029, AGM21793, AGM22026, AGM22028, AGM21885, ADQ90241, AGM22111, AGM22024
GO:0044262	cellular carbohydrate metabolic process	P	0.628797	1.99092	ADQ90459, ADQ90457, ADQ90455, ADQ90460	ADQ90738, ADQ90537, ADQ90326, AGM22029, AGM21793, AGM22026, AGM22313, AGM22028, AGM21885, ADQ90241, AGM22111, AGM22024
GO:0043412	macromolecule modification	P	0.647703	1.95578	ADQ90637, ADQ90824, ADQ90833, ADQ90525, ADQ90611, ADQ90531, ADQ90231, ADQ90484	AGM22130, AGM22390, ADQ90850, AGM22410, AGM21880, ADQ90375, ADQ90551, ADQ90376, ADQ90354, AGM22076, AGM22054, AGM22098, AGM22450, ADQ90671, AGM22099, AGM22397, AGM21783, AGM22431, AGM22319, ADQ90837, AGM21943, AGM21942, AGM21920, AGM22415, ADQ90874, ADQ90379, AGM21946, ADQ90853, ADQ90556, AGM21989, ADQ90421, ADQ90366, AGM22125, AGM22401, AGM22247, AGM22105, ADQ90321, AGM22241, ADQ90242, AGM22187,…
GO:0044248	cellular catabolic process	P	0.718812	1.88529	ADQ90602, ADQ90459, ADQ90457, ADQ90455, ADQ90460	AGM22026, AGM22424, AGM22028, AGM21874, ADQ90780, ADQ90363, AGM22111, AGM22353, AGM22397, AGM22177, AGM22024, AGM22309, ADQ90537, ADQ90846, AGM21930, ADQ90733, AGM22029, ADQ90316, AGM22405, ADQ90820, ADQ90828
GO:0043414	macromolecule methylation	P	0.718812	1.80255	ADQ90637, ADQ90824, ADQ90525, ADQ90611	AGM22130, ADQ90366, AGM22401, ADQ90376, AGM22098, AGM22099, AGM22187, AGM22397, AGM21933, AGM21943, ADQ90379, AGM21946, ADQ90820, ADQ90556
GO:0044710	single-organism metabolic process	P	0.718812	1.79924	ADQ90480, ADQ90454, ADQ90455, ADQ90532, ADQ90587, ADQ90464, ADQ90231, ADQ90492, ADQ90460, AGM21970, ADQ90913, ADQ90309, ADQ90711, ADQ90458, ADQ90459, ADQ90613, ADQ90632, ADQ90852, ADQ90457, ADQ90808, ADQ90838, ADQ90509	AGM22073, AGM22074, AGM22190, ADQ90510, AGM22078, AGM21783, ADQ90877, ADQ90756, ADQ90633, AGM22080, AGM22081, ADQ90883, AGM21793, ADQ90521, AGM21792, AGM22400, AGM22407, ADQ90408, ADQ90405, ADQ90526, ADQ90769, AGM22405, ADQ90402, AGM22050, AGM22051, ADQ90290, AGM22174, AGM21881, AGM22058, AGM22179, AGM22059, AGM21885, ADQ90294, ADQ90738, ADQ90614, ADQ90735, ADQ90612, ADQ90733, AGM22062, AGM22181,…
GO:0044699	single-organism process	P	0.718812	1.78143	ADQ90454, ADQ90455, ADQ90532, ADQ90231, ADQ90693, ADQ90492, ADQ90913, ADQ90711, ADQ90458, ADQ90459, ADQ90613, ADQ90632, ADQ90852, ADQ90875, ADQ90457, ADQ90838, ADQ90480, ADQ90587, ADQ90760, ADQ90464, ADQ90264, ADQ90460, AGM21970, ADQ90309, ADQ90786, ADQ90622, ADQ90808, ADQ90509	AGM22073, AGM22074, AGM22190, ADQ90510, ADQ90750, AGM22198, AGM22078, AGM22199, AGM21783, ADQ90759, AGM21789, ADQ90757, AGM21788, ADQ90876, ADQ90877, ADQ90756, ADQ90753, ADQ90633, ADQ90754, AGM22080, AGM22081, ADQ90883, AGM21793, ADQ90521, AGM21792, AGM22400, AGM22402, ADQ90880, AGM22407, ADQ90408, AGM22408, ADQ90405, ADQ90526, ADQ90769, ADQ90403, AGM22403, AGM22405, ADQ90402, ADQ90886, AGM22050,…
GO:0043101	purine-containing compound salvage	P	0.718812	1.7539	ADQ90492, AGM21970	AGM22062, ADQ90402
GO:0032259	methylation	P	0.821044	1.49828	ADQ90637, ADQ90824, ADQ90525, ADQ90611	AGM22130, AGM22180, ADQ90366, AGM22401, ADQ90376, AGM22098, AGM22099, AGM22187, AGM22397, ADQ90605, AGM21933, AGM21943, ADQ90379, ADQ90357, AGM21946, ADQ90820, ADQ90556, AGM21923
GO:0055114	oxidation-reduction process	P	0.821044	1.4718	ADQ90913, ADQ90458, ADQ90455, ADQ90532, ADQ90464, ADQ90231	AGM22093, AGM21881, AGM22311, ADQ90256, ADQ90771, ADQ90453, ADQ90451, AGM22033, AGM22253, AGM22331, AGM21783, ADQ90735, AGM21864, AGM22238, ADQ90756, ADQ90830, ADQ90677, ADQ90710, AGM21949, AGM22240, AGM22020, ADQ90663, ADQ90322, AGM22345, ADQ90521, ADQ90320, AGM22027, AGM22022, AGM22364, ADQ90382, AGM22288, AGM22024, AGM22407, AGM21810, ADQ90307, AGM22106, ADQ90789, AGM21879
GO:0044237	cellular metabolic process	P	0.821044	1.46752	ADQ90454, ADQ90531, ADQ90455, ADQ90331, ADQ90231, ADQ90492, ADQ90339, ADQ90637, ADQ90238, ADQ90711, ADQ90833, ADQ90459, ADQ90338, ADQ90632, ADQ90456, ADQ90852, ADQ90512, ADQ90457, ADQ90611, ADQ90838, ADQ90480, ADQ90587, ADQ90484, ADQ90264, ADQ90460, AGM21970, ADQ90309, ADQ90329, ADQ90824, ADQ90722, ADQ90525, ADQ90602, ADQ90786, ADQ90808, ADQ90729, ADQ90509	AGM21782, ADQ90510, AGM21781, AGM21784, AGM21783, ADQ90639, ADQ90879, ADQ90758, ADQ90513, ADQ90877, ADQ90514, ADQ90874, ADQ90633, ADQ90641, ADQ90883, ADQ90520, AGM21793, AGM21792, AGM22400, AGM22401, AGM21790, AGM21794, ADQ90408, ADQ90405, ADQ90526, ADQ90406, ADQ90769, ADQ90887, AGM22405, ADQ90402, ADQ90644, ADQ90850, AGM21880, AGM21885, ADQ90738, ADQ90614, ADQ90735, AGM21886, ADQ90612, ADQ90733,…
GO:0044281	small molecule metabolic process	P	0.821044	1.46546	ADQ90480, ADQ90454, ADQ90455, ADQ90492, ADQ90460, AGM21970, ADQ90309, ADQ90711, ADQ90459, ADQ90613, ADQ90852, ADQ90457, ADQ90808, ADQ90838, ADQ90509	AGM22073, AGM22074, AGM22234, ADQ90472, ADQ90351, AGM22111, AGM22078, ADQ90471, AGM21827, ADQ90359, AGM21826, AGM21945, AGM21829, AGM21828, AGM21949, AGM22080, ADQ90883, AGM22366, AGM21793, AGM22367, AGM21792, ADQ90367, ADQ90241, AGM21830, ADQ90363, ADQ90481, ADQ90240, ADQ90803, AGM21833, ADQ90405, AGM21832, AGM21831, AGM21838, AGM21959, ADQ90489, AGM22405, ADQ90402, AGM22050, AGM22051, ADQ90696,…
GO:0044723	single-organism carbohydrate metabolic process	P	0.821044	1.41148	ADQ90480, ADQ90459, ADQ90457, ADQ90455, ADQ90460	AGM22050, ADQ90392, AGM22272, AGM22372, ADQ90696, ADQ90256, ADQ90796, AGM22313, AGM21885, AGM22111, AGM22276, ADQ90738, ADQ90537, ADQ90698, ADQ90710, AGM21949, AGM21793, AGM22026, AGM22028, ADQ90241, AGM21972, ADQ90382, AGM22288, AGM22024, ADQ90405, AGM21810, ADQ90326, AGM22029, AGM21959
GO:0009249	protein lipoylation	P	0.821044	1.38807	ADQ90531, ADQ90484	AGM21880, AGM22105, ADQ90321, AGM22054
GO:0018065	protein-cofactor linkage	P	0.821044	1.38807	ADQ90531, ADQ90484	AGM21880, AGM22105, ADQ90321, AGM22054
GO:0044712	single-organism catabolic process	P	0.821044	1.31753	ADQ90480, ADQ90459, ADQ90457, ADQ90455, ADQ90460	AGM22050, ADQ90392, AGM22272, AGM22372, ADQ90696, ADQ90796, AGM22313, AGM21885, AGM22111, ADQ90738, ADQ90537, ADQ90733, ADQ90710, AGM21949, AGM21793, AGM22026, AGM22028, ADQ90241, ADQ90363, AGM21972, ADQ90382, AGM22288, AGM22024, AGM22309, ADQ90405, AGM21930, ADQ90326, AGM22029, AGM21959, AGM22405, ADQ90828
GO:1901575	organic substance catabolic process	P	0.821044	1.30895	ADQ90480, ADQ90602, ADQ90459, ADQ90457, ADQ90455, ADQ90460	AGM22050, ADQ90392, AGM22272, AGM22372, ADQ90696, ADQ90730, ADQ90796, AGM22313, AGM21885, AGM22111, AGM22353, AGM22397, AGM22177, ADQ90738, ADQ90537, ADQ90733, ADQ90316, ADQ90710, AGM21949, AGM21793, AGM22026, AGM22424, AGM22028, ADQ90241, AGM21874, ADQ90780, ADQ90363, AGM21972, ADQ90382, AGM22288, AGM22024, AGM22309, ADQ90405, ADQ90846, AGM21930, ADQ90326, AGM22029, AGM21959, AGM22306, AGM22405,…
