# Supplementary material for: Quantitative Proteomic Analyses of a Pathogenic Strain and Its Highly Passaged Attenuated Strain of Mycoplasma hyopneumoniae
Source: Biomed Res Int. 2019 Jul 1;2019:4165735. doi: 10.1155/2019/4165735 (PMC6634062; doi:10.1155/2019/4165735)
Supplement: Supplementary 4 — Table S4: bioinformatic analyses of the differentially expressed uncharacterized/hypothetical proteins. [file 4165735.f4.xlsx]

## Sheet: Sheet1
Supplementary Table 4: Bioinformatic analyses of the differentially expressed uncharacterized/hypothetical proteins.
		LipoP	LIPO	TMHMM	PSORTb	CELLO	SignalP	SecretomeP	BlastP	pfam	InterPro
Gene_locus	Accession Number	Lipoprotein		Number of predicted TMHs	Subcellular location		Signal peptide	non-classical secretion	Family/Domains	Domains	Homologous superfamily	Family	Domains and repeats	Site	Biological Process	Molecular Function	Cellular Component
proteins which were more abundant in 168
MHP168_495	ADQ90691			0	Cytoplasmic	Cytoplasmic	No	No	Cof-type HAD-IIB family hydrolase	Hydrolase_3 Domain	HAD-like superfamily; HAD superfamily	HAD-superfamily hydrolase, subfamily IIB; Cof family	None predicted		None predicted	hydrolase activity	None predicted
MHP168_323	ADQ90530			0	Cytoplasmic	Cytoplasmic	No	No	deacetylase SIR2	No result	DHS-like NAD/FAD-binding domain superfamily; Sirtuin, catalytic core small domain superfamily	None predicted	Sirtuin family, catalytic core domain		None predicted	None predicted	None predicted
MHP168_634	ADQ90824			0	Cytoplasmic	Cytoplasmic	No	No	SAM-dependent DNA methyltransferase	N6_Mtase Family	S-adenosyl-L-methionine-dependent methyltransferase	None predicted	DNA methylase, adenine-specific	DNA methylase, N-6 adenine-specific, conserved site	DNA methylation; methylation	nucleic acid binding; DNA binding; methyltransferase activity; N-methyltransferase activity	None predicted
MHP168_549	ADQ90745	SpⅡ	Lipoprotein	0	Unknown	OuterMembrane	Yes	No	Leucine-rich repeat domain-containing protein	LRR_5 Repeat	Leucine-rich repeat domain superfamily	None predicted	BspA type Leucine rich repeat region		None predicted	None predicted	None predicted
MHP168_673	ADQ90859	SpⅡ		0	Unknown	OuterMembrane	No	Yes	LppA family lipoprotein	No result	None predicted	Mycoides cluster lipoprotein, LppA/p72	None predicted		None predicted	None predicted	None predicted
MHP168_731	ADQ90910			0	Unknown	Cytoplasmic	No	No	Glycine cleavage system protein H	GCV_H Domain	Single hybrid motif	Glycine cleavage system H-protein/Simiate; Glycine cleavage system H-protein	None predicted		glycine decarboxylation via glycine cleavage system	None predicted	glycine cleavage complex
MHP168_638	ADQ90827	SpⅡ		1	OuterMembrane	OuterMembrane	No	Yes	DUF31 domain-containing protein	DUF31 Domain (Putative peptidase)	None predicted	Uncharacterised protein family MG067	Putative peptidase DUF31		None predicted	None predicted	None predicted
MHP168_104	ADQ90324	SpⅠ		1	Unknown	OuterMembrane	No	Yes	No result	No result	None predicted	None predicted	None predicted		None predicted	None predicted	None predicted
proteins which were more abundant in 168-L
MHP168_066	ADQ90289			0	Unknown (This protein may have multiple localization sites.)	OuterMembrane	No	No	SGNH/GDSL hydrolase family protein	No result	None predicted	None predicted	Bromodomain		None predicted	protein binding	None predicted
MHP168_531	ADQ90727	SpⅠ		0	OuterMembrane	OuterMembrane	No	No	SGNH/GDSL hydrolase family protein	Lipase_GDSL Family	None predicted	None predicted	GDSL lipase/esterase		None predicted	hydrolase activity, acting on ester bonds	None predicted
MHP168_317	ADQ90524			0	Cytoplasmic	Cytoplasmic	No	No	DEAD/DEAH box helicase	ResIII Family	P-loop containing nucleoside triphosphate hydrolase	None predicted	Helicase/UvrB, N-terminal		None predicted	DNA binding; ATP binding; hydrolase activity	None predicted
